# Supplementary material for: A zwitterionic disilanylium from an unsymmetrical disilene
Source: Royal Society of Chemistry journal article supplement (doi:10.1039/d2cc06954g), 2023-01-01
Supplement: d2cc06954g1.pdf [file d2cc06954g1.pdf]

## Supporting Information

for

### A zwitterionic disilanylium from an unsymmetric disilene

Milan Kumar Bisai,<sup>ab†</sup> V. S. Ajithkumar,<sup>ab†</sup> K. Vipin Raj,<sup>bc</sup> Kumar Vanka\*,<sup>bc</sup> Rajesh G. Gonnade\*,<sup>bc</sup>  
and Sakya S. Sen<sup>\*ab</sup>

<sup>a</sup>*Inorganic Chemistry and Catalysis Division, CSIR-National Chemical Laboratory, Dr. Homi Bhabha Road, Pashan, Pune 411008, India.*

<sup>b</sup>*Academy of Scientific and Innovative Research (AcSIR), Ghaziabad-201002, India.*

<sup>c</sup>*Physical and Materials Chemistry Division, CSIR-National Chemical Laboratory, Dr. Homi Bhabha Road, Pashan, Pune 411008, India.*

Author to whom correspondence should be addressed: E-mail: [ss.sen@ncl.res.in](mailto:ss.sen@ncl.res.in)

#### Content

- ❖ General experimental information
- ❖ Synthesis and analytical data of  $[\text{PhC}(\text{N}t\text{Bu})_2]\text{Si}(\text{CH}_2\text{SiMe}_3)=\text{Si}(\text{SiMe}_3)_2$  (**2**).
- ❖ Synthesis and analytical data of  $[\text{PhC}(\text{N}t\text{Bu})_2]\text{Si}(\text{CH}_2\text{SiMe}_3)\text{Cl}_2$  (**3**).
- ❖ Synthesis and analytical data of  $[\text{PhC}(\text{N}t\text{Bu})_2]\text{Si}(=\text{S})\text{CH}_2\text{SiMe}_3$  (**4**).
- ❖ Synthesis and analytical data of  $[\text{PhC}(\text{N}t\text{Bu})_2]\text{Si}(=\text{Se})\text{CH}_2\text{SiMe}_3$  (**5**).
- ❖ Synthesis and analytical data of  $[\text{PhC}(\text{N}t\text{Bu})_2]\text{Si}(\text{CH}_2\text{SiMe}_3)\text{Si}(\text{Te})(\text{SiMe}_3)_2$  (**6**).
- ❖ Synthesis and analytical data of  $[\text{PhC}(\text{N}t\text{Bu})_2]\text{Si}(\text{H})(\text{CH}_2\text{SiMe}_3)\text{Si}(\text{TeBcat})(\text{SiMe}_3)_2$  (**7**).
- ❖ Representative NMR spectra.
- ❖ Details of DFT calculations.
- ❖ Reaction with  $\text{Me}_3\text{NO}$
- ❖ Crystallographic data for the structural analysis of compounds **2-4** and **6**.
- ❖ References

**General Experimental Information.** All experiments were carried out under argon atmosphere using Schlenk techniques or inside a MBRAUN glove box. Toluene and *n*-hexane, were purified by MBRAUN solvent purification system MB SPS-800 and stored over activated 4 Å molecular sieves prior to use. Benzene-*d*<sub>6</sub> was distilled over Na/benzophenone and stored over activated 4 Å molecular sieves prior to use. The precursors, [PhC(*Nt*Bu)<sub>2</sub>SiSi(Si(Me)<sub>3</sub>)<sub>3</sub>] (**1**)<sup>1</sup> and [PhC(*Nt*Bu)<sub>2</sub>SiCl] (**1'**)<sup>2</sup> and (SiMe<sub>3</sub>)<sub>3</sub>SiK·2thf,<sup>3</sup> were synthesized by using literature procedure. Chemical purchased from Sigma Aldrich and TCI Chemicals were used without further purification. <sup>1</sup>H, <sup>13</sup>C, <sup>29</sup>Si, and <sup>77</sup>Se NMR spectra were recorded in C<sub>6</sub>D<sub>6</sub> using a Bruker Advance DPX 200 or a Bruker Advance DRX 400 or 500 spectrometers. Melting points were measured in a sealed glass tube using Stuart SMP-30 melting point apparatus.

**Synthesis of [PhC(*Nt*Bu)<sub>2</sub>]Si(CH<sub>2</sub>SiMe<sub>3</sub>)=Si(SiMe<sub>3</sub>)<sub>2</sub> (**2**).** To the 20 mL toluene solution of **1** (1.000 g, 1.97 mmol), 5 mL toluene solution of Me<sub>3</sub>SiCH<sub>2</sub>Cl (0.242 g, 1.97 mmol) was added drop by drop at room temperature. The dark orange-red reaction mixture was allowed to stir for 12 h. After that all the volatiles were removed under reduced pressure, dried for 1 h and the residue was extracted with *n*-hexane (10 mL). The solution was filtered through cannula and the resulting filtrate concentrated to ~3 mL and stored at -4°C in a freezer for overnight to isolate red crystals of **2** (0.802 g, 78% yield). Mp: 84-85 °C. <sup>1</sup>H NMR (400 MHz, C<sub>6</sub>D<sub>6</sub>, 298 K): δ 7.46-7.44 (d, <sup>3</sup>J<sub>H-H</sub> = 7.63 Hz, 1H, Ph), 7.12-7.10 (d, <sup>3</sup>J<sub>H-H</sub> = 8.39 Hz, 1H, Ph), 6.98-6.95 (m, 1H, Ph), 6.91-6.87 (m, 2H, Ph), 1.19 (s, 18H, *t*Bu), 0.89 (s, 2H, CH<sub>2</sub>SiMe<sub>3</sub>), 0.68 (s, 18H, Si(SiMe<sub>3</sub>)<sub>2</sub>), 0.28 (s, 9H, CH<sub>2</sub>SiMe<sub>3</sub>) ppm; <sup>13</sup>C {<sup>1</sup>H} NMR (100.6 MHz, C<sub>6</sub>D<sub>6</sub>, 298 K): δ 172.0 (NCN), 134.4 (Ph), 129.6 (Ph), 129.3 (Ph), 53.9 (CMe<sub>3</sub>), 32.1 (CMe<sub>3</sub>), 9.1 (CH<sub>2</sub>SiMe<sub>3</sub>), 2.4 (CH<sub>2</sub>SiMe<sub>3</sub>), -1.1 {=Si(SiMe<sub>3</sub>)<sub>2</sub>}, -1.3 {=Si(SiMe<sub>3</sub>)<sub>2</sub>} ppm; <sup>29</sup>Si {<sup>1</sup>H} NMR (99.3 MHz, C<sub>6</sub>D<sub>6</sub>, 298 K): δ 65.1 {s, LSi(CH<sub>2</sub>SiMe<sub>3</sub>)=Si(SiMe<sub>3</sub>)<sub>2</sub>}, -0.02 {s, LSi(CH<sub>2</sub>SiMe<sub>3</sub>)=Si(SiMe<sub>3</sub>)<sub>2</sub>}, -1.1 {s, LSi(CH<sub>2</sub>SiMe<sub>3</sub>)=Si(SiMe<sub>3</sub>)<sub>2</sub>}, -7.0 {s, LSi(CH<sub>2</sub>SiMe<sub>3</sub>)=Si(SiMe<sub>3</sub>)<sub>2</sub>} ppm. Elemental Analysis: calcd. C, 57.62; H, 10.06; N, 5.38; found C, 57.93; H, 10.31; N, 5.21.

**Synthesis of [PhC(*Nt*Bu)<sub>2</sub>]Si(CH<sub>2</sub>SiMe<sub>3</sub>)Cl<sub>2</sub> (**3**).** To the 20 mL toluene solution of [PhC(*Nt*Bu)<sub>2</sub>SiCl] (**1'**) (0.500 g, 1.69 mmol), toluene solution (5 mL) of Me<sub>3</sub>SiCH<sub>2</sub>Cl (0.210 g, 1.69 mmol) was added at room temperature. The resultant reaction mixture was heated at 60 °C for 12 h with vigorous stirring. Upon completion, the solution was filtered through cannula and the resulting filtrate was concentrated to ~2 mL to get colorless crystal of **3**, suitable for single crystal X-ray analysis (0.642 g, 90% yield). Mp: 228-229 °C. <sup>1</sup>H NMR (500 MHz, C<sub>6</sub>D<sub>6</sub>, 298 K): δ 6.93-6.91 (m, 3H, Ph), 6.85-6.84 (m, 2H, Ph), 1.20 (s, 18H, *t*Bu), 1.08 (s, 2H, CH<sub>2</sub>SiMe<sub>3</sub>), 0.43 (s, 9H, CH<sub>2</sub>SiMe<sub>3</sub>) ppm; <sup>13</sup>C {<sup>1</sup>H} NMR (125.7 MHz, C<sub>6</sub>D<sub>6</sub>, 298 K): δ 168.9 (NCN), 127.9 (Ph), 126.9 (Ph), 125.7 (Ph), 53.8 (CMe<sub>3</sub>), 30.4 (CMe<sub>3</sub>), 15.3 (CH<sub>2</sub>SiMe<sub>3</sub>), 0.04 (CH<sub>2</sub>SiMe<sub>3</sub>) ppm; <sup>29</sup>Si {<sup>1</sup>H} NMR (99.3 MHz, C<sub>6</sub>D<sub>6</sub>, 298 K): δ 0.05

{LSi(CH<sub>2</sub>SiMe<sub>3</sub>)Cl<sub>2</sub>}, -74.3 {LSi(CH<sub>2</sub>SiMe<sub>3</sub>)Cl<sub>2</sub>} ppm. Elemental Analysis: calcd. C, 54.65; H, 8.21; N, 6.71; found C, 54.52; H, 8.43; N, 6.69.

**Synthesis of [PhC(N*t*Bu)<sub>2</sub>]Si(=S)CH<sub>2</sub>SiMe<sub>3</sub> (4).** 8 mL of toluene was added to the mixture of **2** (0.200 g, 0.38 mmol) and S (13 mg, 0.38 mmol) at -78 °C. The reaction mixture was allowed to reach room temperature slowly and stirred further for 2-3 h. After that, the yellow colored solution was reduced to half, the filtrate was separated using a cannula and then kept for crystallization at -4 °C to get pale yellow crystals of **4** (0.070 g, 48% yield). Mp: 139-140 °C. <sup>1</sup>H NMR (400 MHz, C<sub>6</sub>D<sub>6</sub>, 298 K): δ 6.98-6.95 (m, 2H, Ph), 6.92-6.87 (m, 2H, Ph), 6.82-6.81 (m, 1H, Ph), 1.13 (s, 18H, *t*Bu), 0.68 (s, 2H, CH<sub>2</sub>SiMe<sub>3</sub>), 0.50 (s, 9H, CH<sub>2</sub>SiMe<sub>3</sub>) ppm; <sup>13</sup>C{<sup>1</sup>H} NMR (100.6 MHz, C<sub>6</sub>D<sub>6</sub>, 298 K): δ 173.5 (NCN), 131.0 (Ph), 130.4 (Ph), 129.3 (Ph), 125.7 (Ph), 55.0 (CMe<sub>3</sub>), 31.4 (CMe<sub>3</sub>), 9.4 (CH<sub>2</sub>SiMe<sub>3</sub>), 1.9 (CH<sub>2</sub>SiMe<sub>3</sub>) ppm; <sup>29</sup>Si{<sup>1</sup>H} NMR (99.3 MHz, C<sub>6</sub>D<sub>6</sub>, 298 K): δ 19.4 {s, LSi(CH<sub>2</sub>SiMe<sub>3</sub>)=S}, 0.02 {s, LSi(CH<sub>2</sub>SiMe<sub>3</sub>)=S} ppm. Elemental Analysis: calcd. C, 60.26; H, 9.05; N, 7.40; found C, 60.10; H, 8.85; N, 7.98.

**Synthesis of [PhC(N*t*Bu)<sub>2</sub>]Si(=Se)CH<sub>2</sub>SiMe<sub>3</sub> (5).** 8 mL of toluene was added to the mixture of **2** (0.200 g, 0.38 mmol) and Se (13 mg, 0.38 mmol) at -78 °C. The reaction mixture was allowed to reach room temperature slowly and stirred further for 5-6 h. After that, the pale yellow colored solution was reduced to half, the filtrate was separated using a cannula, and kept for crystallization at -4 °C to get colorless crystals of **5** (0.080 g, 49% yield). Mp: 198-199 °C. <sup>1</sup>H NMR (400 MHz, C<sub>6</sub>D<sub>6</sub>, 298 K): δ 6.96-6.92 (m, 2H, Ph), 6.89-6.84 (m, 2H, Ph), 6.82-6.81 (m, 1H, Ph), 1.15 (s, 18H, *t*Bu), 0.79 (s, 2H, CH<sub>2</sub>SiMe<sub>3</sub>), 0.49 (s, 9H, CH<sub>2</sub>SiMe<sub>3</sub>) ppm; <sup>13</sup>C{<sup>1</sup>H} NMR (100.6 MHz, C<sub>6</sub>D<sub>6</sub>, 298 K): δ 171.3 (NCN), 129.2 (Ph), 128.4 (Ph), 126.4 (Ph), 53.3 (CMe<sub>3</sub>), 29.5 (CMe<sub>3</sub>), 9.5 (CH<sub>2</sub>SiMe<sub>3</sub>), -0.09 (CH<sub>2</sub>SiMe<sub>3</sub>) ppm; <sup>29</sup>Si{<sup>1</sup>H} NMR (99.3 MHz, C<sub>6</sub>D<sub>6</sub>, 298 K): δ 20.3 {s, LSi(CH<sub>2</sub>SiMe<sub>3</sub>)=Se}, 0.4 {s, LSi(CH<sub>2</sub>SiMe<sub>3</sub>)=Se} ppm; <sup>77</sup>Se{<sup>1</sup>H} NMR (76.3 MHz, C<sub>6</sub>D<sub>6</sub>, 298 K): δ -413.7 ppm. Elemental Analysis: calcd. C, 53.62; H, 8.05; N, 6.58; found C, 53.45; H, 8.01; N, 6.86.

**Synthesis of [PhC(N*t*Bu)<sub>2</sub>]Si(CH<sub>2</sub>SiMe<sub>3</sub>)-SiTe(SiMe<sub>3</sub>)<sub>2</sub> (6).** 8 mL of toluene was added to the mixture of **2** (0.200 g, 0.38 mmol) and Te (13 mg, 0.38 mmol) at -78 °C. The reaction mixture was allowed to reach room temperature slowly and stirred further for 6 h. After that, the orange-red colored solution was reduced to half, the filtrate was separated using a cannula and then kept for crystallization at -4 °C to get red crystals of **6** (0.088 g, 35% yield). Mp: 79-80 °C. <sup>1</sup>H NMR (400 MHz, C<sub>6</sub>D<sub>6</sub>, 298 K): δ 7.69 (d, J = 7.7 Hz, 1H), 7.12-7.10 (m, 1H, Ph), 7.01-6.97 (m, 1H, Ph), 6.92-6.87 (m, 2H, Ph), 1.39 (s, 2H, CH<sub>2</sub>SiMe<sub>3</sub>), 1.20 (s, 18H, *t*Bu), 0.67 (s, 18H, Si(SiMe<sub>3</sub>)<sub>2</sub>), 0.15 (s, 9H, CH<sub>2</sub>SiMe<sub>3</sub>) ppm; <sup>13</sup>C{<sup>1</sup>H} NMR (100.6 MHz, CDCl<sub>3</sub>, 298 K): δ 172.2 (NCN), 129.4 (Ph), 128.4 (Ph), 126.8 (d, Ph), 126.7 (Ph), 54.0 (CMe<sub>3</sub>), 30.3 (CMe<sub>3</sub>), 29.6 (CH<sub>2</sub>SiMe<sub>3</sub>), 0.09 {Si(SiMe<sub>3</sub>)<sub>2</sub>}, -0.09 (CH<sub>2</sub>SiMe<sub>3</sub>) ppm; <sup>29</sup>Si{<sup>1</sup>H} NMR (99.3 MHz, C<sub>6</sub>D<sub>6</sub>, 298 K): δ 21.2 {s, LSi(CH<sub>2</sub>SiMe<sub>3</sub>)=SiTe(SiMe<sub>3</sub>)<sub>2</sub>}, 1.5 {s, LSi(CH<sub>2</sub>SiMe<sub>3</sub>)=SiTe(SiMe<sub>3</sub>)<sub>2</sub>}, 0.35 {s, LSi(CH<sub>2</sub>SiMe<sub>3</sub>)=SiTe(SiMe<sub>3</sub>)<sub>2</sub>}, -20.4 {s,

$\text{LSi}(\text{CH}_2\text{SiMe}_3)=\text{SiTe}(\text{SiMe}_3)_2\}$  ppm;  $^{125}\text{Te}\{^1\text{H}\}$  NMR (126.3 MHz,  $\text{C}_6\text{D}_6$ , 298 K):  $\delta$  -396.8 ppm. Elemental Analysis: calcd. C, 46.29; H, 8.08; N, 4.32; found C, 47.12; H, 8.94; N, 5.09. Due to the air and moisture sensitivity of the crystals, the obtained values deviate from the calculated ones.

**Synthesis of  $[\text{PhC}(\text{N}t\text{Bu})_2]\text{Si}(\text{H})(\text{CH}_2\text{SiMe}_3)\text{-Si}(\text{TeBcat})(\text{SiMe}_3)_2$  (7).** To the 0.6 mL  $\text{C}_6\text{D}_6$  solution of **6** (0.060 g, 0.09 mmol) taken in a NMR tube, HBcat (0.012 g, 0.09 mmol) was added drop by drop at room temperature. The colour of the reaction mixture was started changing from red to pale green over 15 min to afford compound **7**.

N.B. The formation of **7** is always accompanied by  $\text{PhC}(\text{N}t\text{Bu})_2\text{Bcat}$  (**8**).

$^1\text{H}$  NMR (400 MHz,  $\text{C}_6\text{D}_6$ , 298 K):  $\delta$  7.08-7.06(m, 2H, Ph), 6.95-6.92 (m, 2H, Ph), 6.88-6.86 (m, 3H, Ph), 6.78-6.77 (m, 2H, Ph), 3.01 (s, 1H, SiH), 1.18 (s, 18H, *t*Bu), 0.93 (s, 2H,  $\text{CH}_2\text{SiMe}_3$ ), 0.41 (s, 9H,  $\text{CH}_2\text{SiMe}_3$ ), 0.29 (s, 18H,  $\text{Si}(\text{SiMe}_3)_2$ ) ppm;  $^{13}\text{C}\{^1\text{H}\}$  NMR (100.6 MHz,  $\text{C}_6\text{D}_6$ , 298 K):  $\delta$  172.7 (NCN), 131.4 (Ph), 130.5(Ph), 128.6 (Ph), 128.4 (Ph), 128.0 (Ph), 123.0 (Ph), 112.8 (Ph), 55.8 ( $\text{CMe}_3$ ), 31.6 ( $\text{CMe}_3$ ), 15.2 ( $\text{CH}_2\text{SiMe}_3$ ), 2.0  $\{\text{Si}(\text{SiMe}_3)_2$ , 1.2 ( $\text{CH}_2\text{SiMe}_3$ ) ppm;  $^{11}\text{B}$  NMR (128.3 MHz,  $\text{C}_6\text{D}_6$ , 298 K):  $\delta$  38.8 ppm;  $^{29}\text{Si}\{^1\text{H}\}$  NMR (99.3 MHz,  $\text{C}_6\text{D}_6$ , 298 K):  $\delta$  1.4  $\{\text{s, LSiH}(\text{CH}_2\text{SiMe}_3)=\text{Si}(\text{TeBcat})(\text{SiMe}_3)_2\}$ , 0.30  $\{\text{s, LSiH}(\text{CH}_2\text{SiMe}_3)=\text{Si}(\text{TeBcat})(\text{SiMe}_3)_2\}$ , -2.7  $\{\text{s, LSiH}(\text{CH}_2\text{SiMe}_3)=\text{Si}(\text{TeBcat})(\text{SiMe}_3)_2\}$ , -12.2  $\{\text{s, LSiH}(\text{CH}_2\text{SiMe}_3)=\text{Si}(\text{TeBcat})(\text{SiMe}_3)_2\}$  ppm;  $^{125}\text{Te}\{^1\text{H}\}$  NMR (126.3 MHz,  $\text{C}_6\text{D}_6$ , 298 K):  $\delta$  -234.6 ppm. Due to the sensitivity of the compound we could not obtain a reliable elemental analysis data despite several attempts.

Representative NMR spectra:

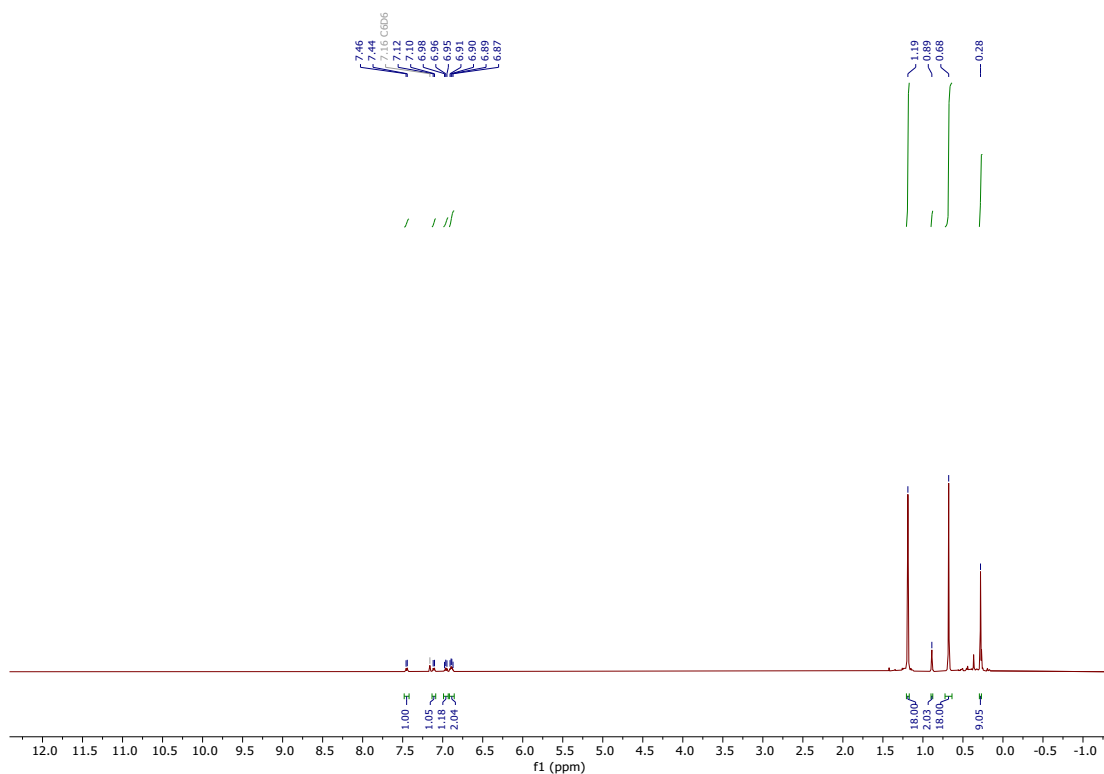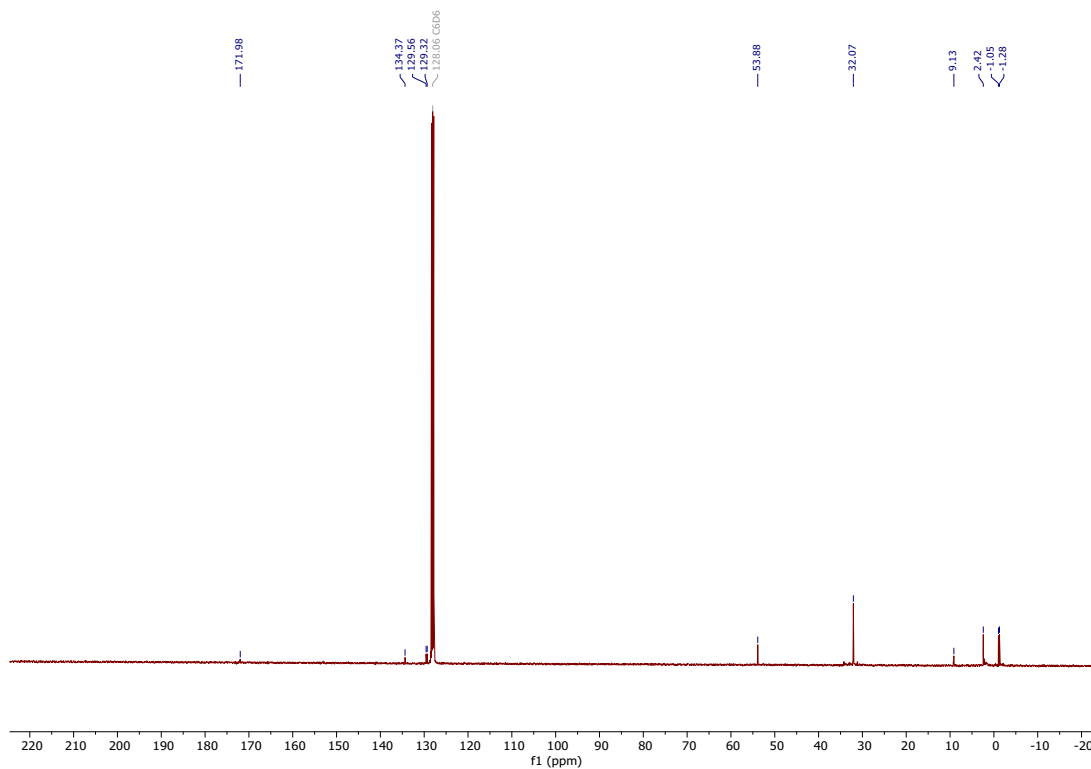

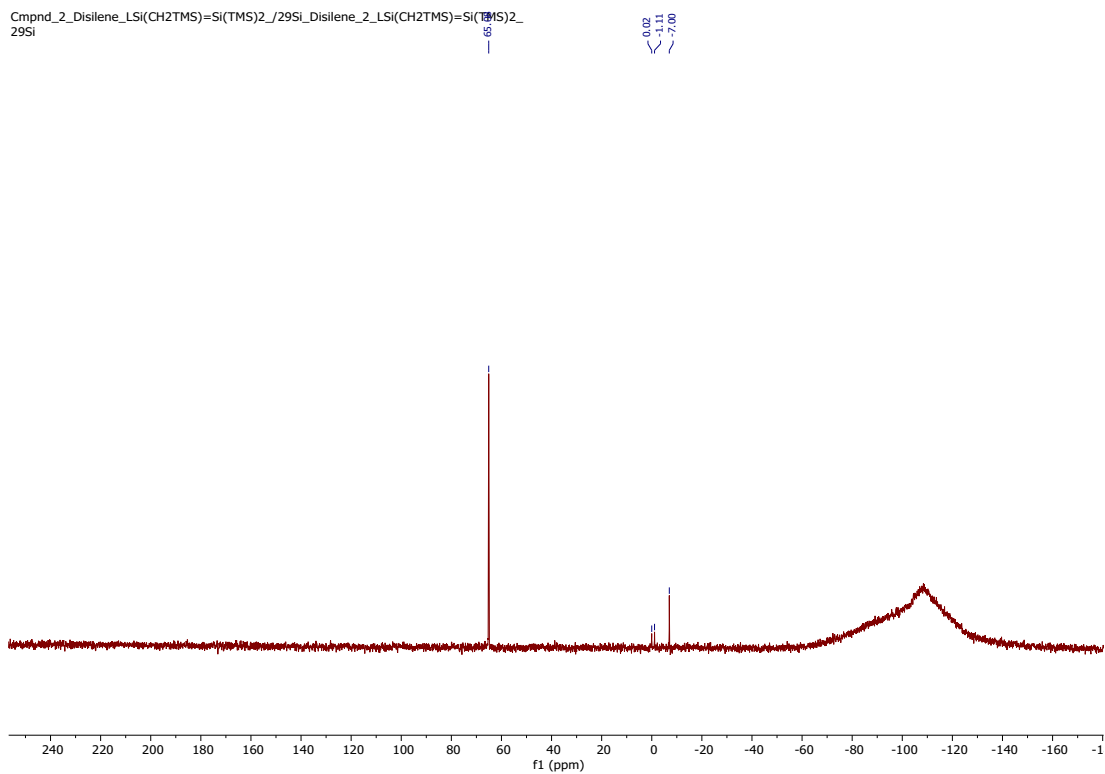

Figure S3.  $^{29}\text{Si}$  NMR Spectrum of **2** ( $\text{C}_6\text{D}_6$ , 99.3 MHz, 298 K)

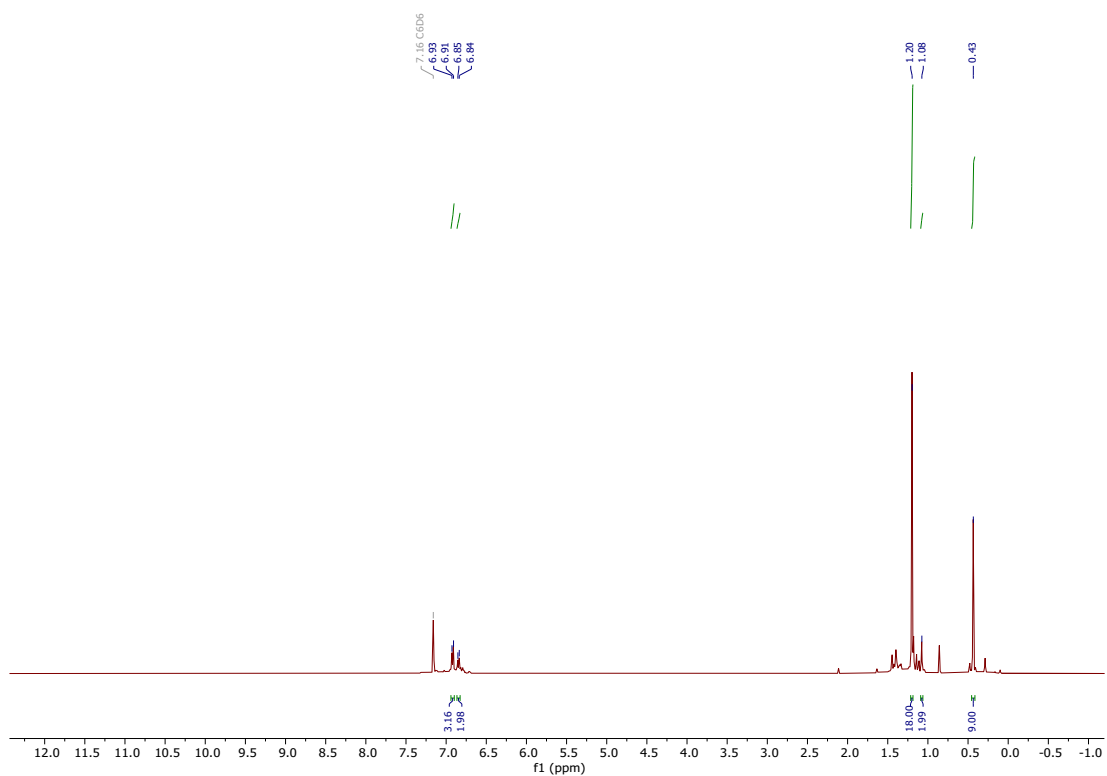

Figure S4.  $^1\text{H}$  NMR Spectrum of **3** ( $\text{C}_6\text{D}_6$ , 500 MHz, 298 K)

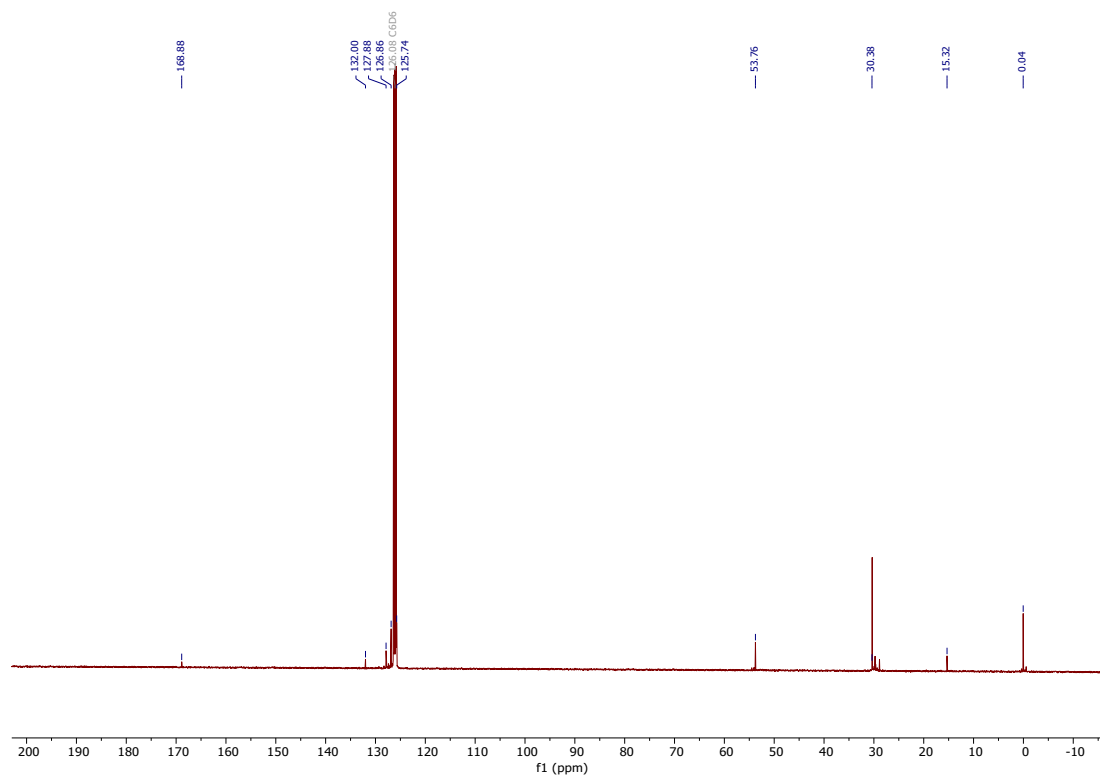

Figure S5.  $^{13}\text{C}$  NMR Spectrum of **3** ( $\text{C}_6\text{D}_6$ , 125.7 MHz, 298 K)

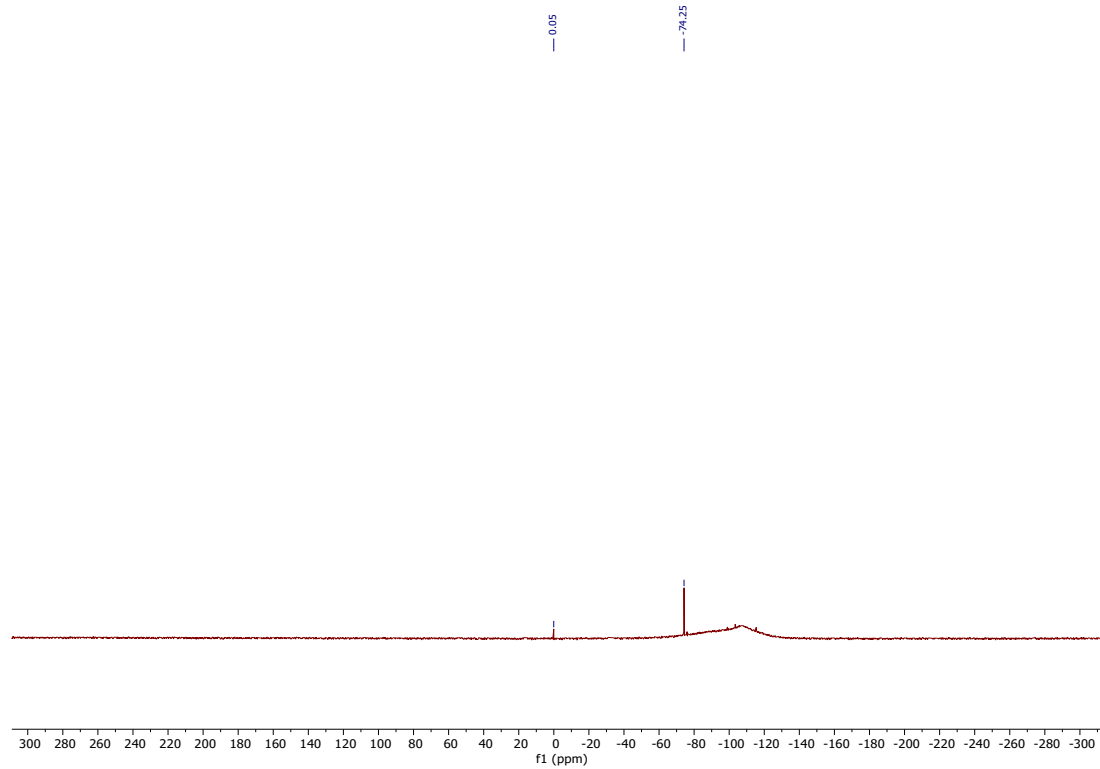

Figure S6.  $^{29}\text{Si}$  NMR Spectrum of **3** ( $\text{C}_6\text{D}_6$ , 99.3 MHz, 298 K)





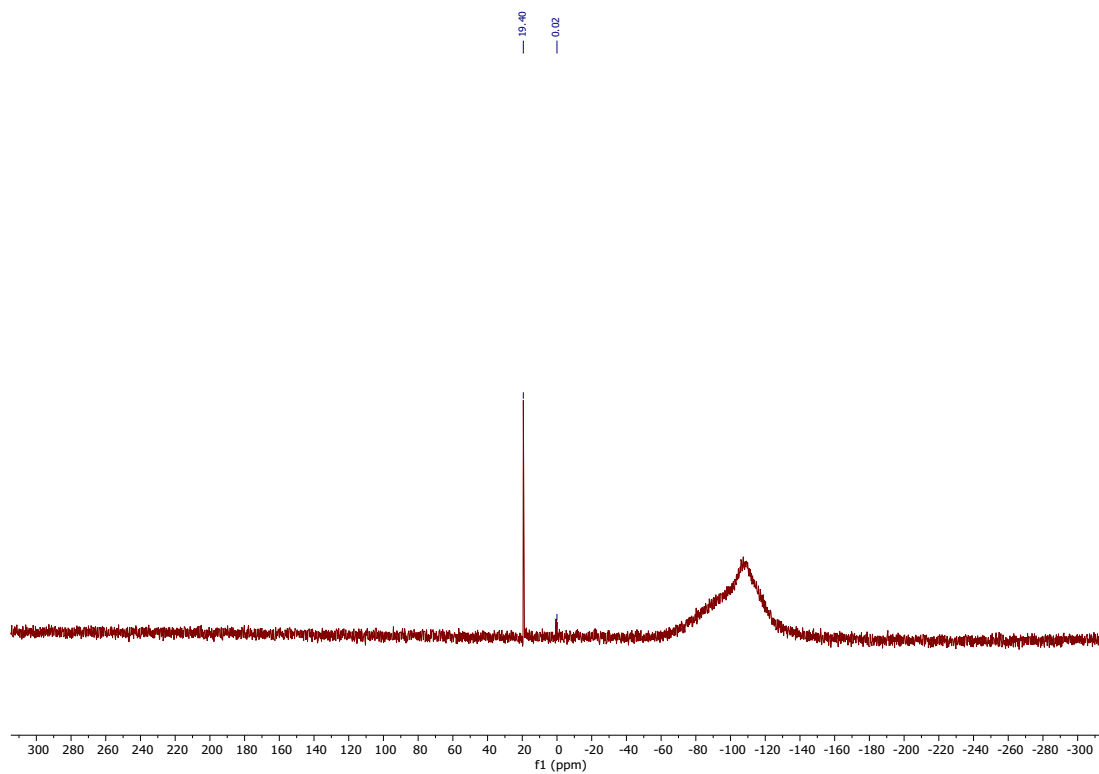

Figure S9.  $^{29}\text{Si}$  NMR Spectrum of **4** ( $\text{C}_6\text{D}_6$ , 99.3 MHz, 298 K)

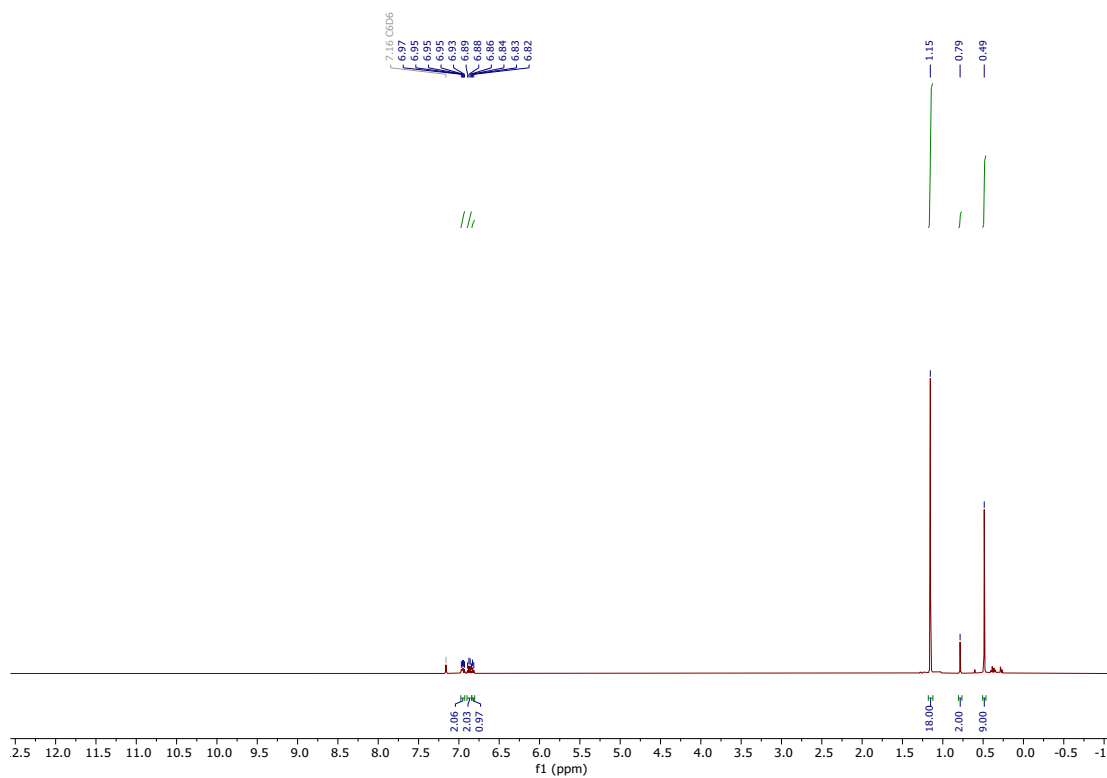

Figure S10.  $^1\text{H}$  NMR Spectrum of **5** ( $\text{C}_6\text{D}_6$ , 400 MHz, 298 K)

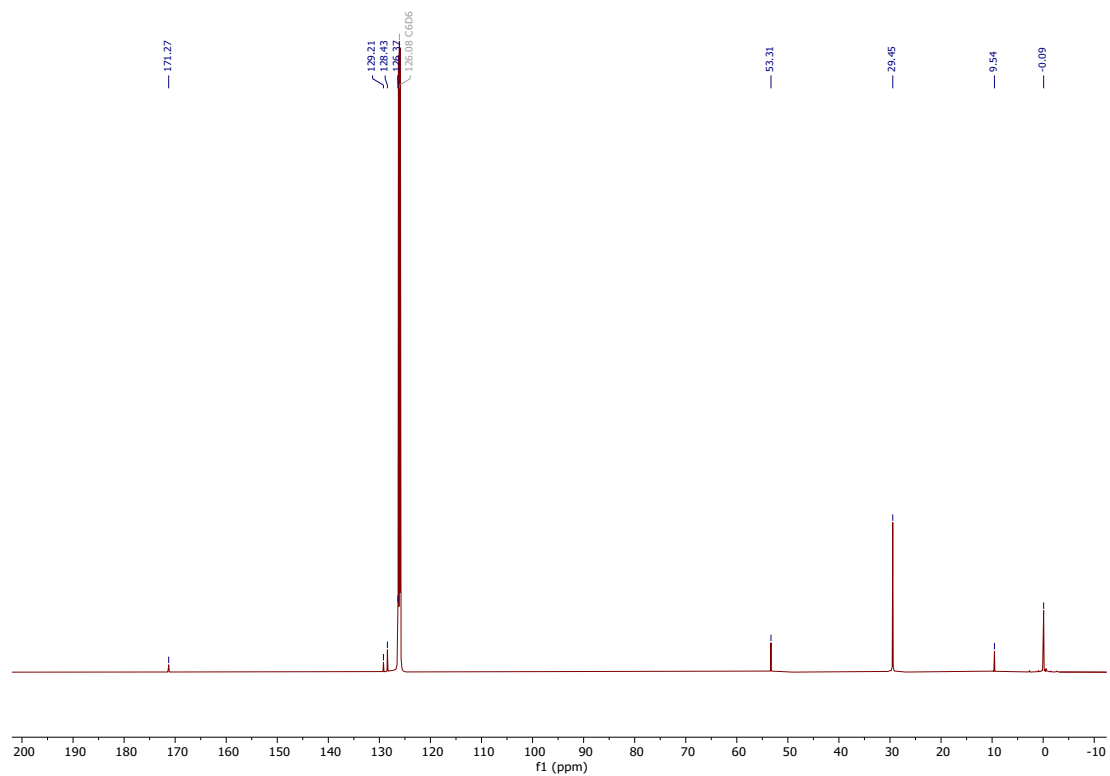

S11.  $^{13}\text{C}$  NMR Spectrum of **5** ( $\text{C}_6\text{D}_6$ , 100.6 MHz, 298 K)

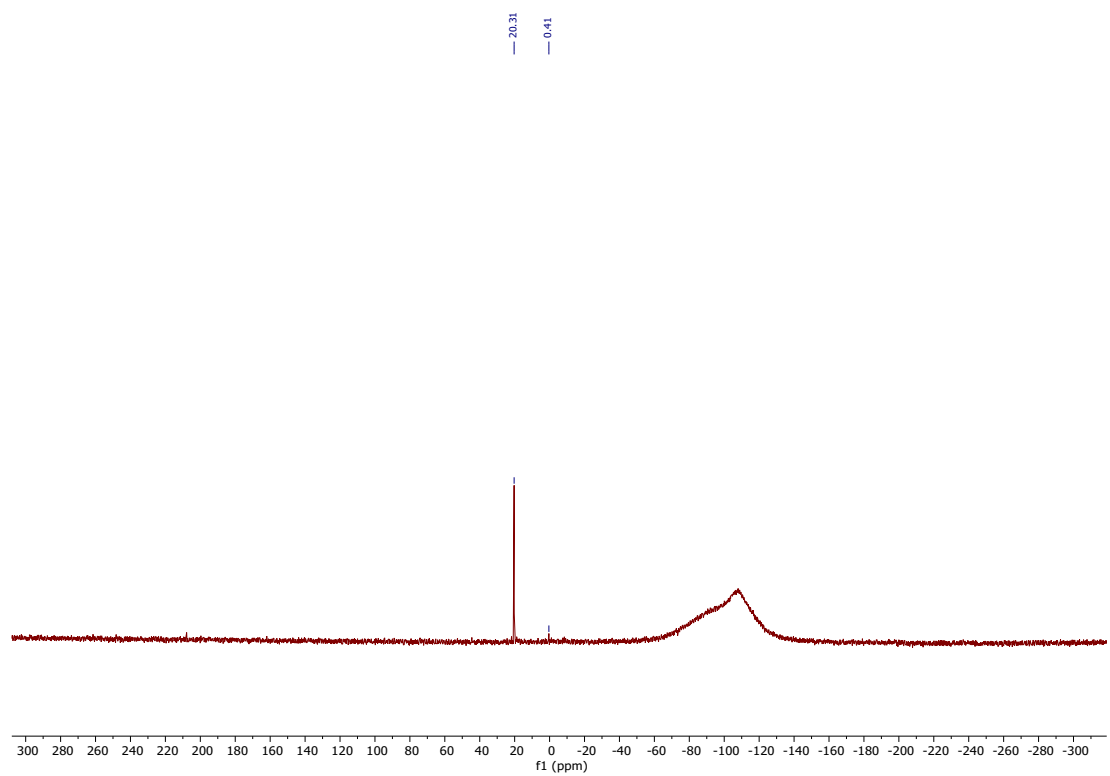

Figure S12.  $^{29}\text{Si}$  NMR Spectrum of **5** ( $\text{C}_6\text{D}_6$ , 99.3 MHz, 298 K)

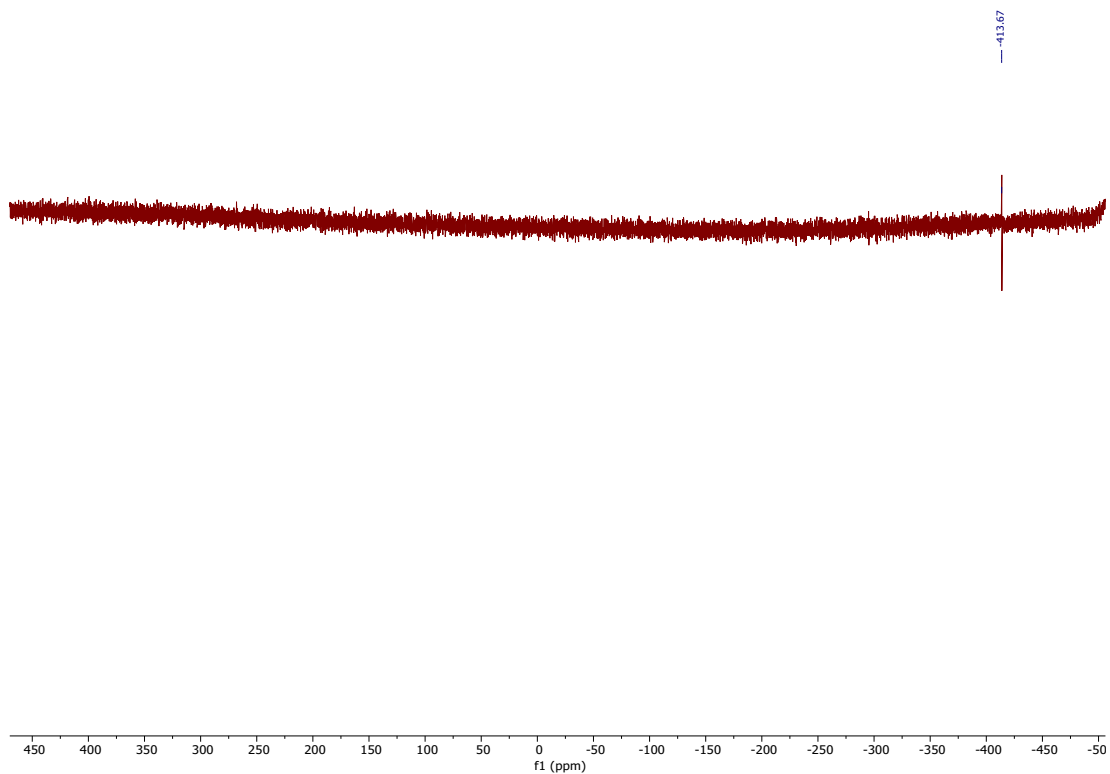

Figure S13. <sup>77</sup>Se NMR Spectrum of **5** (C<sub>6</sub>D<sub>6</sub>, 76.3 MHz, 298 K)

20220616-ns-disi-te.1.fid

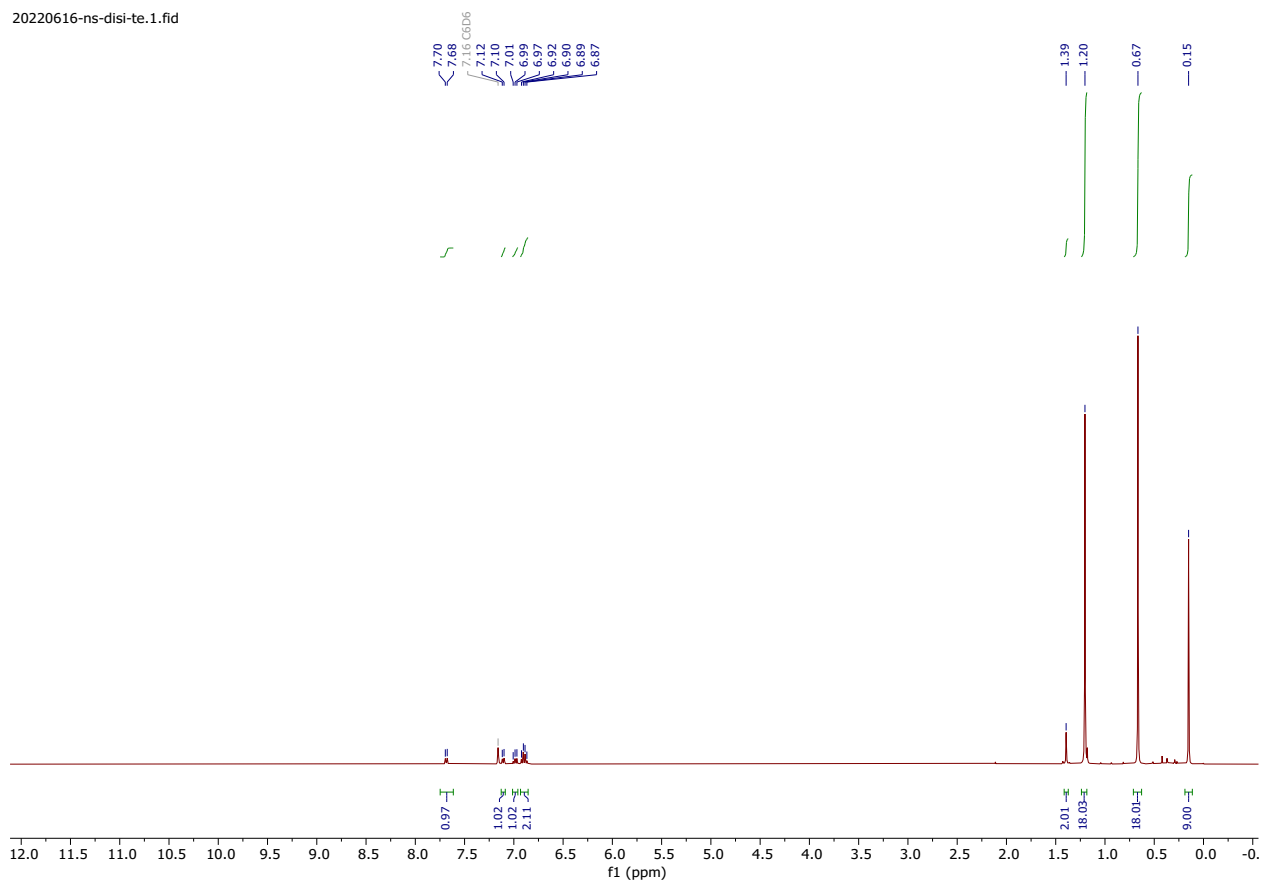

Figure S14. <sup>1</sup>H NMR Spectrum of **6** (C<sub>6</sub>D<sub>6</sub>, 400 MHz, 298 K)

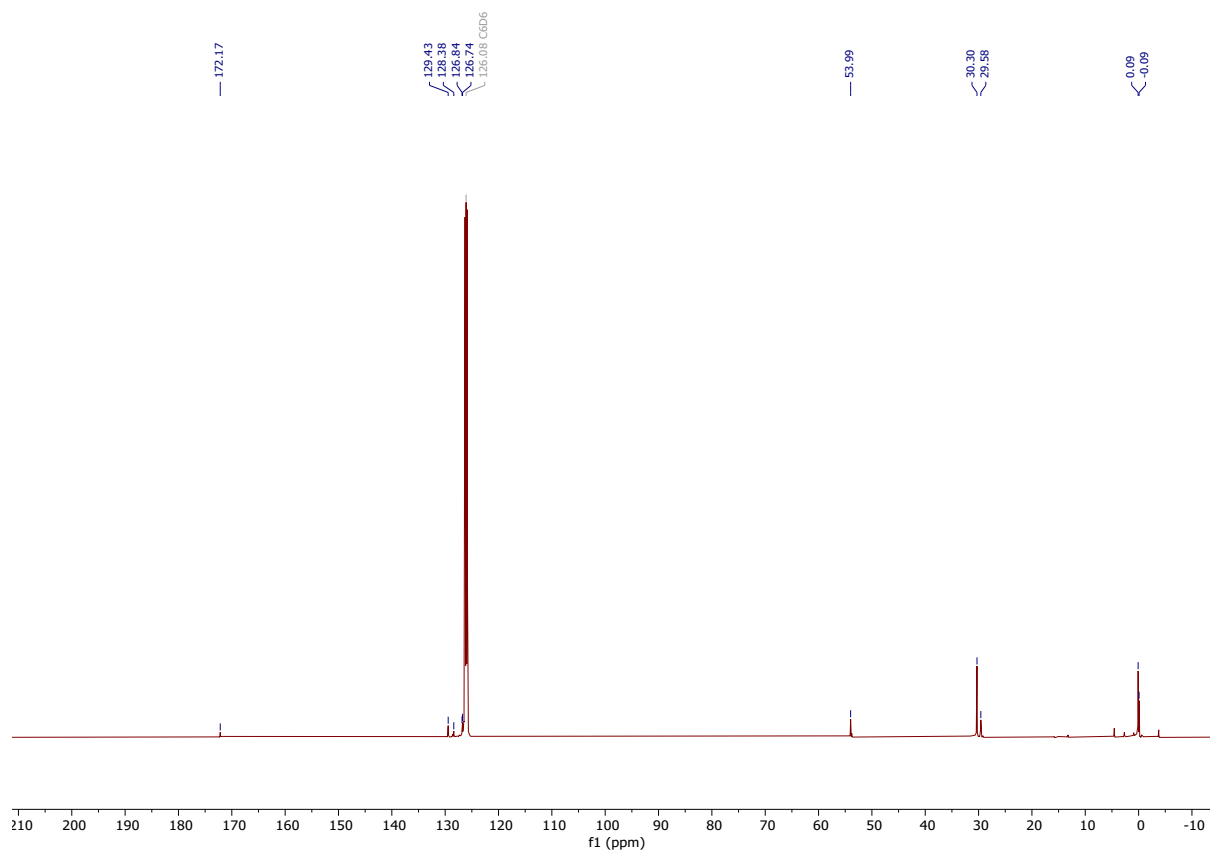

S15. <sup>13</sup>C NMR Spectrum of **6** (C<sub>6</sub>D<sub>6</sub>, 100.6 MHz, 298 K)

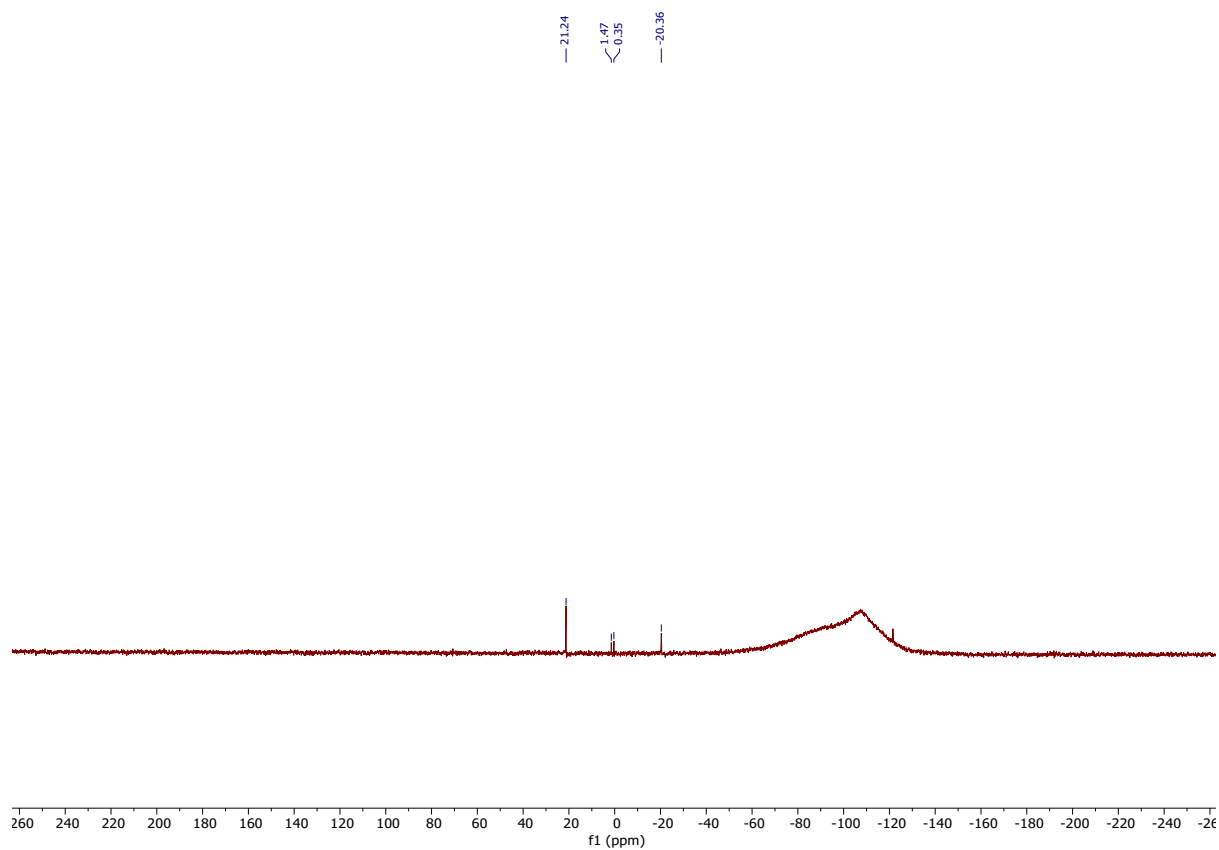

Figure S16. <sup>29</sup>Si NMR Spectrum of **6** (C<sub>6</sub>D<sub>6</sub>, 99.3 MHz, 298 K)

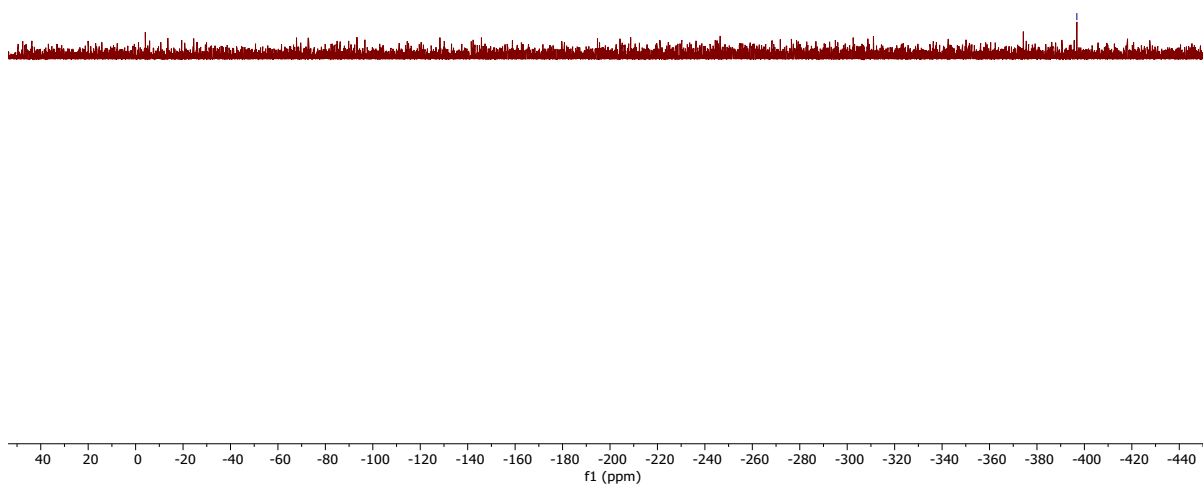Figure S17.  $^{125}\text{Te}$  NMR Spectrum of **6** ( $\text{C}_6\text{D}_6$ , 126.3 MHz, 298 K).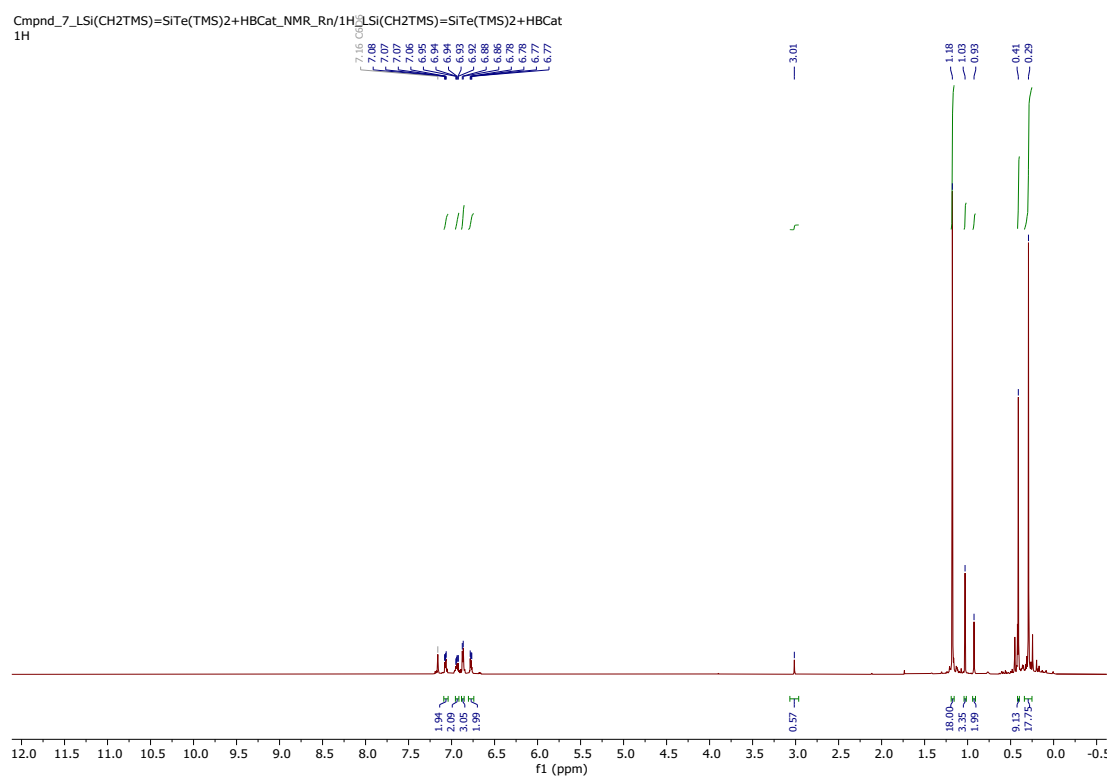Figure S18.  $^1\text{H}$  NMR Spectrum of **6** + HBCat reaction ( $\text{C}_6\text{D}_6$ , 400 MHz, 298 K)

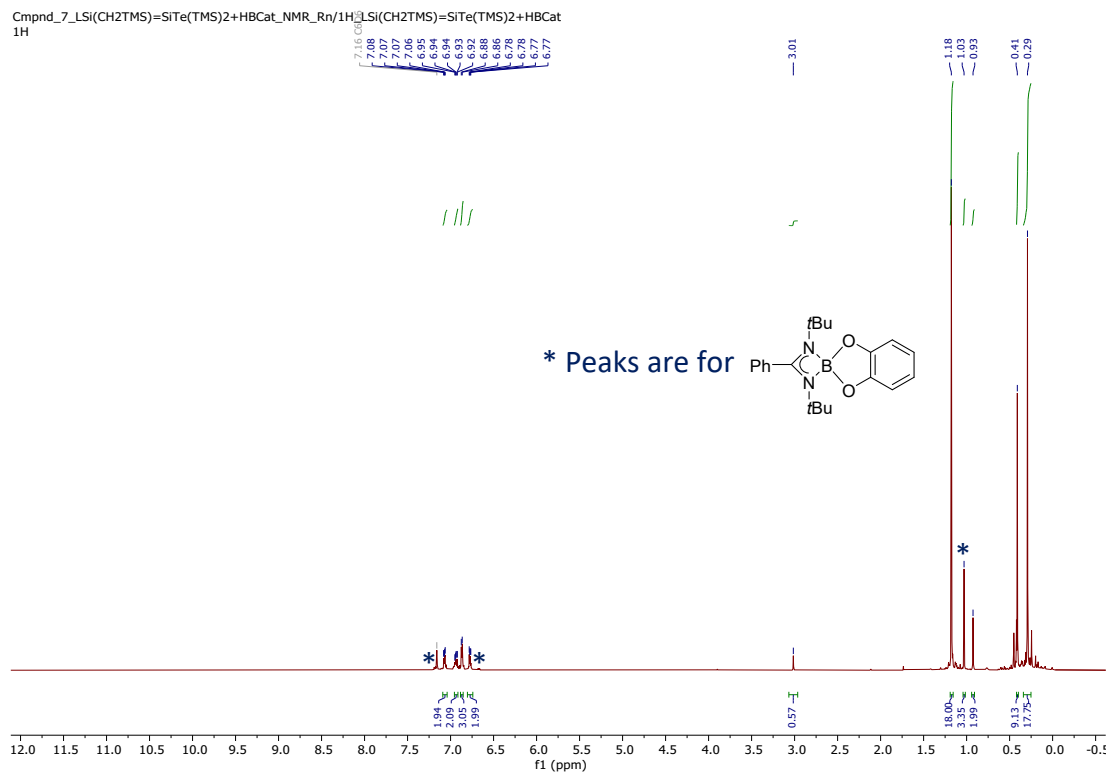

Figure S19.  $^1\text{H}$  NMR Spectrum of **6** + HBCat reaction ( $\text{C}_6\text{D}_6$ , 400 MHz, 298 K)

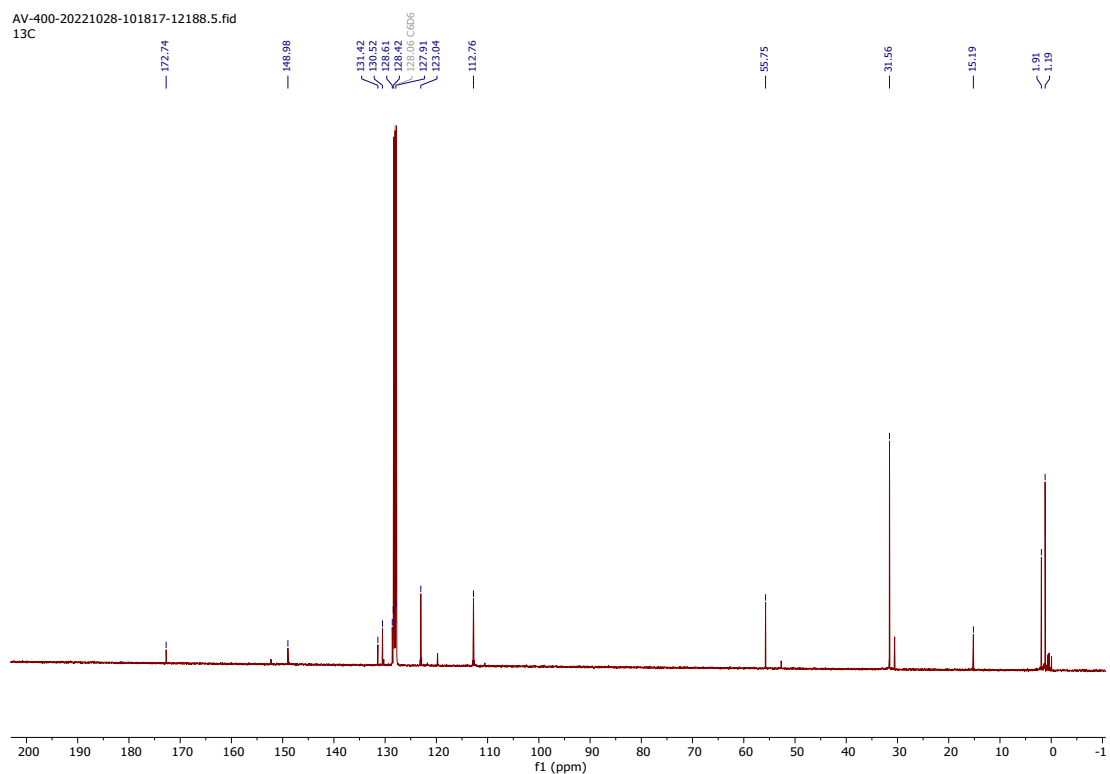

Figure S20.  $^{13}\text{C}$  NMR Spectrum of **6** + HBCat reaction ( $\text{C}_6\text{D}_6$ , 100.6 MHz, 298 K)

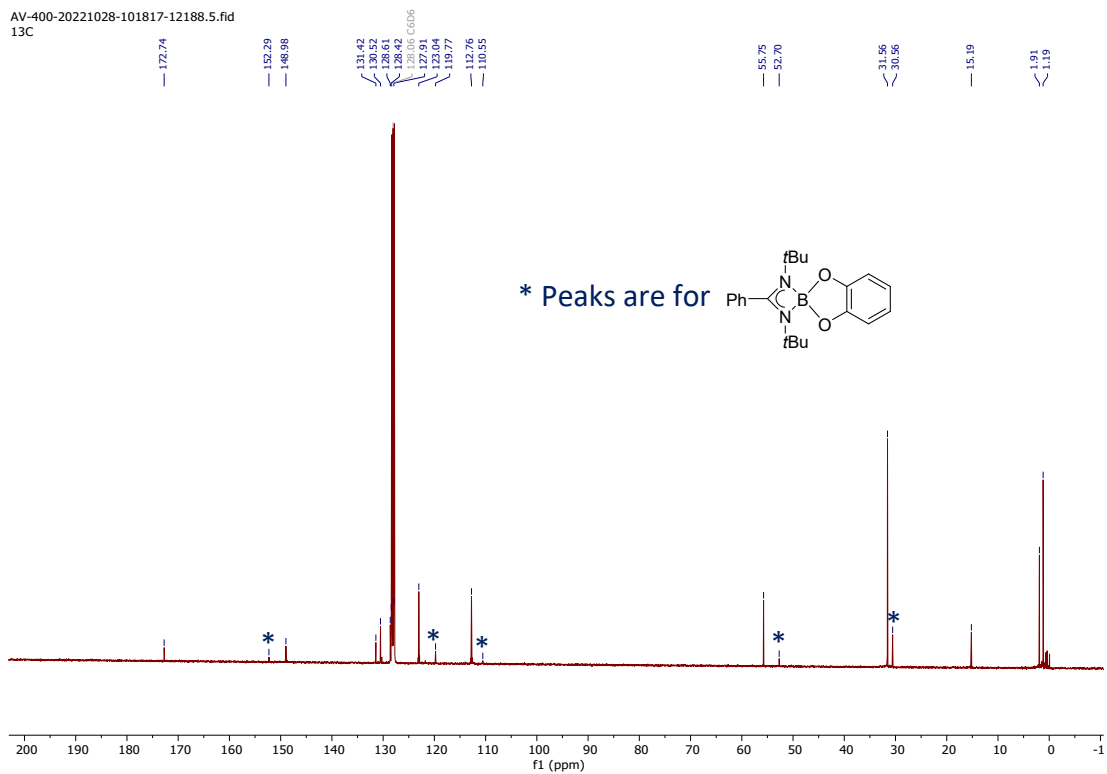

Figure S21. <sup>13</sup>C NMR Spectrum of **6** + HBcat reaction (C<sub>6</sub>D<sub>6</sub>, 100.6 MHz, 298 K)

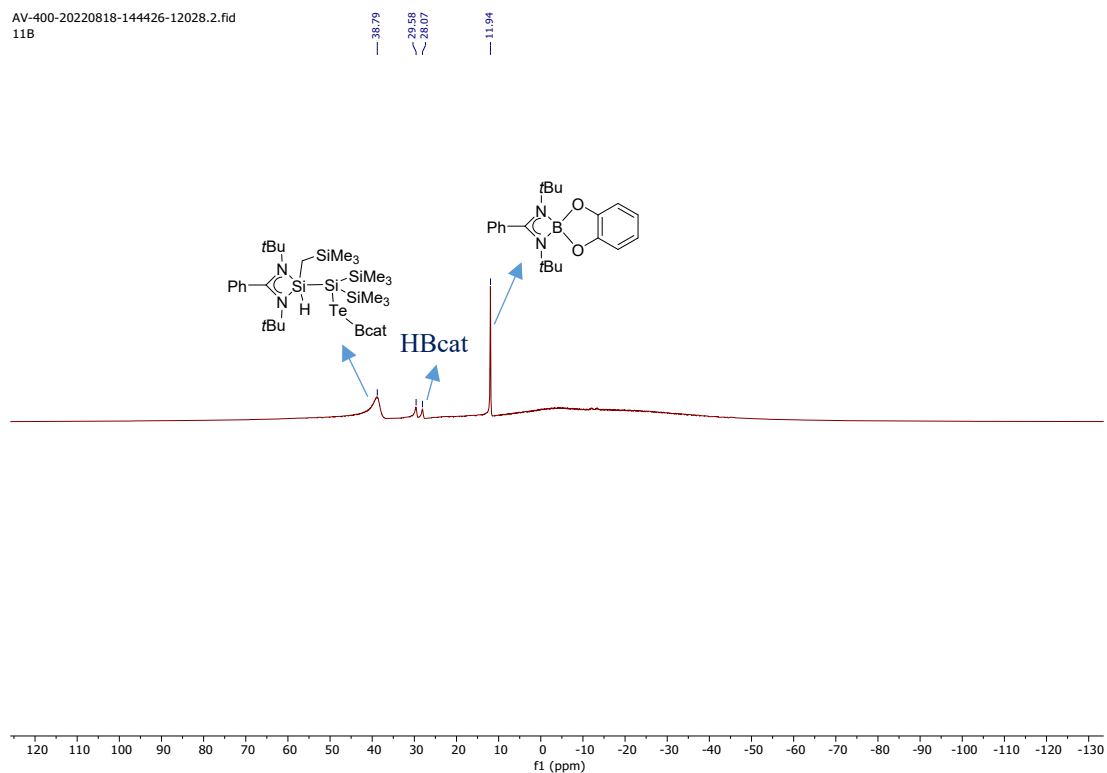

Figure S22. <sup>11</sup>B NMR Spectrum of **6** + HBcat reaction (C<sub>6</sub>D<sub>6</sub>, 128.3 MHz, 298 K)

1.44  
0.30  
2.71  
12.21

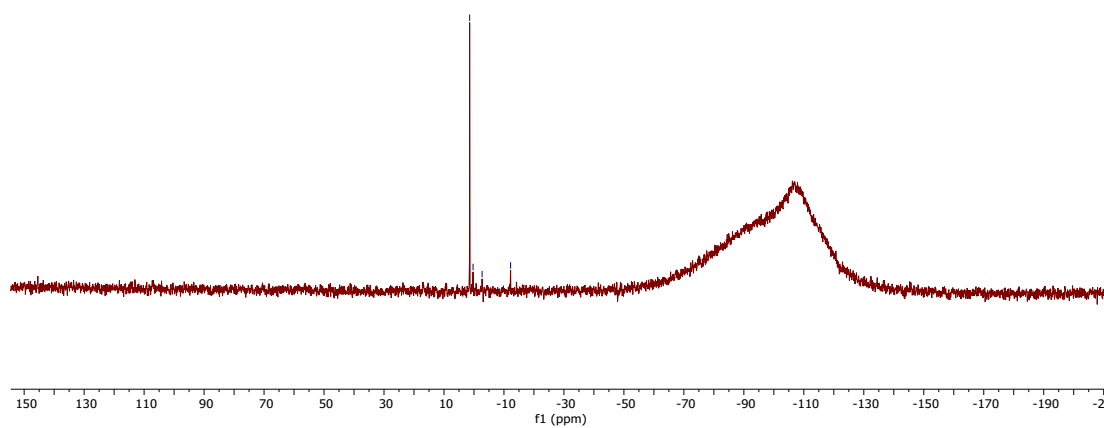

Figure S23.  $^{29}\text{Si}$  NMR Spectrum of **6** + HBcat reaction ( $\text{C}_6\text{D}_6$ , 99.3 MHz, 298 K)

238.60

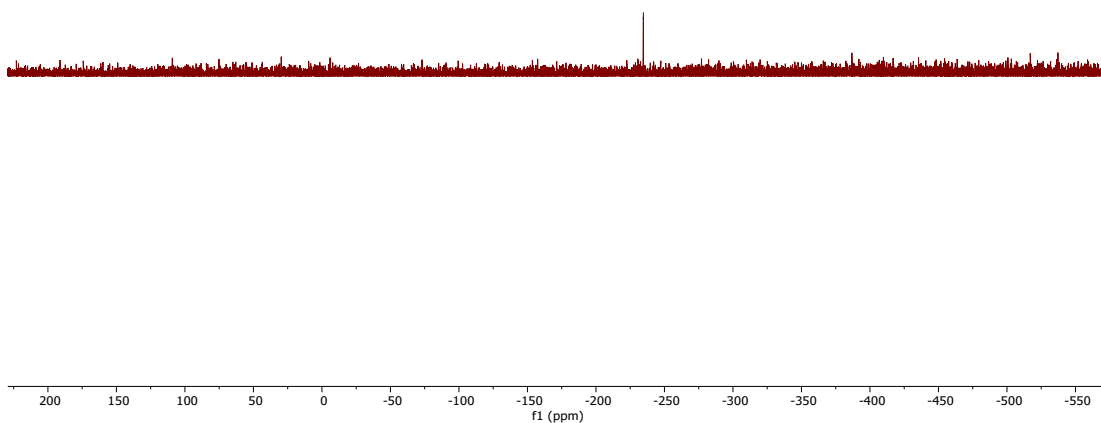

Figure S24.  $^{125}\text{Te}$  NMR Spectrum of **6** + HBcat reaction ( $\text{C}_6\text{D}_6$ , 126.3 MHz, 298 K)



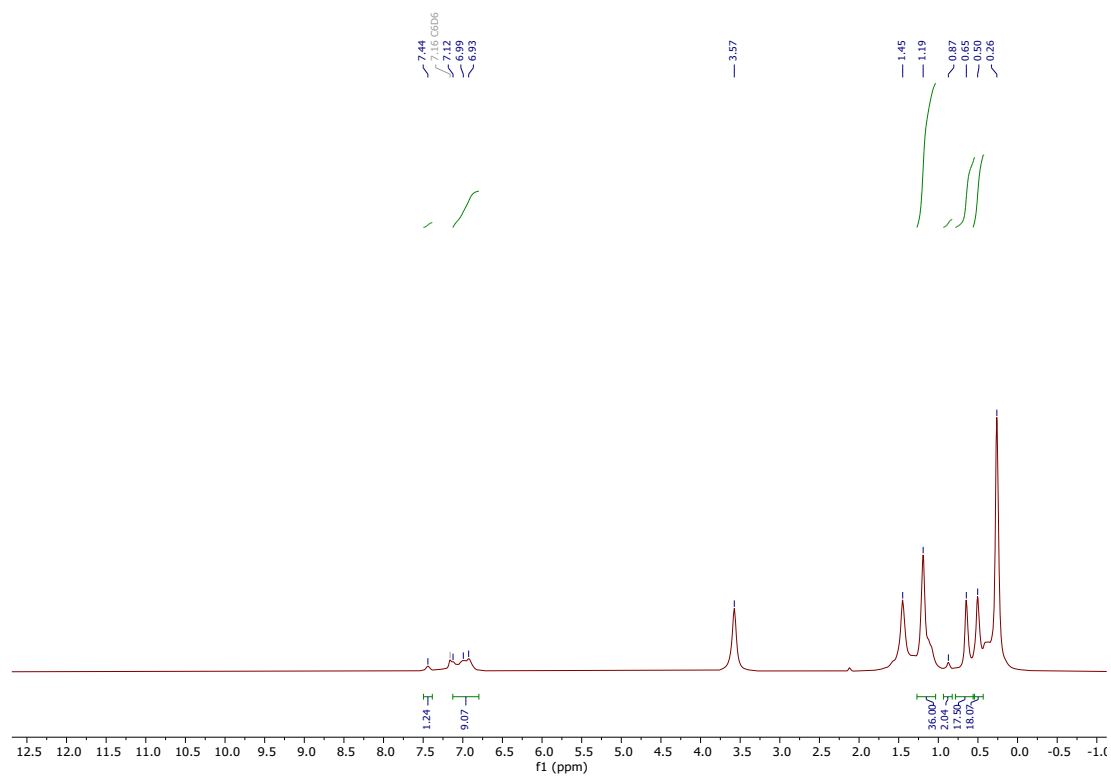

Figure S25. <sup>1</sup>H NMR Spectrum for the NMR tube reaction of **3** and KSi(SiMe<sub>3</sub>)<sub>3</sub>·2thf (C<sub>6</sub>D<sub>6</sub>, 400 MHz, 298 K)

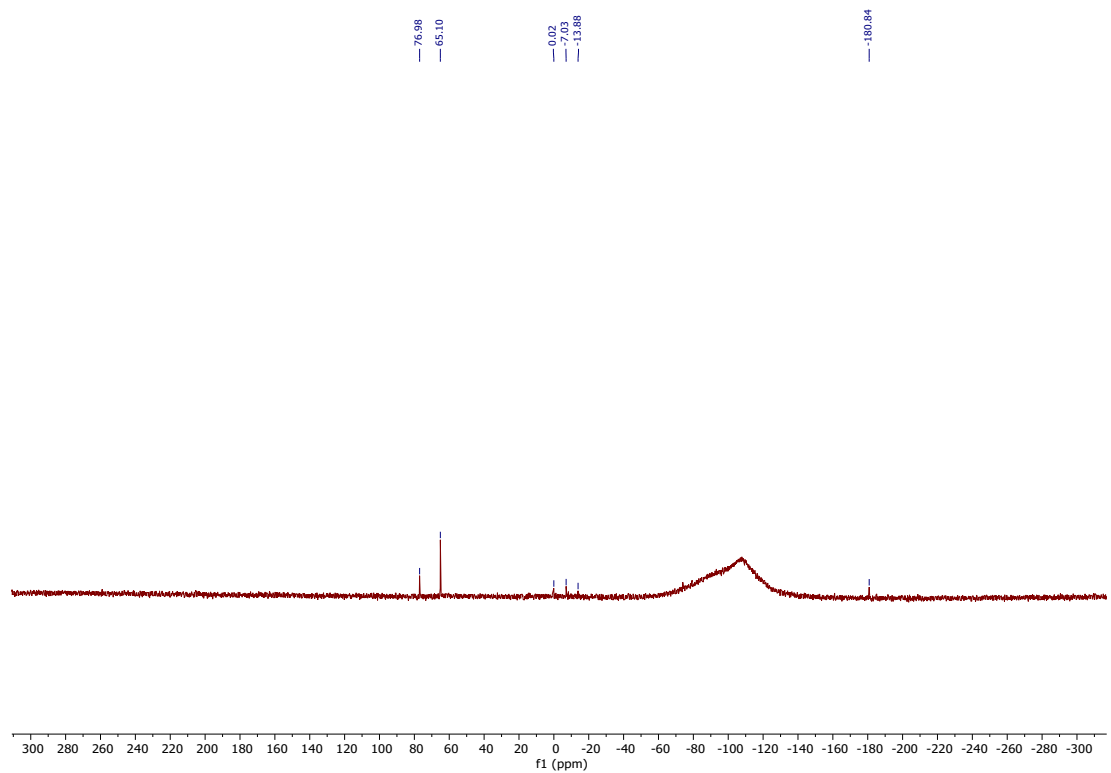

Figure S26. <sup>29</sup>Si NMR Spectrum for the NMR tube reaction of **3** and KSi(SiMe<sub>3</sub>)<sub>3</sub>·2thf (C<sub>6</sub>D<sub>6</sub>, 99.3 MHz, 298 K)

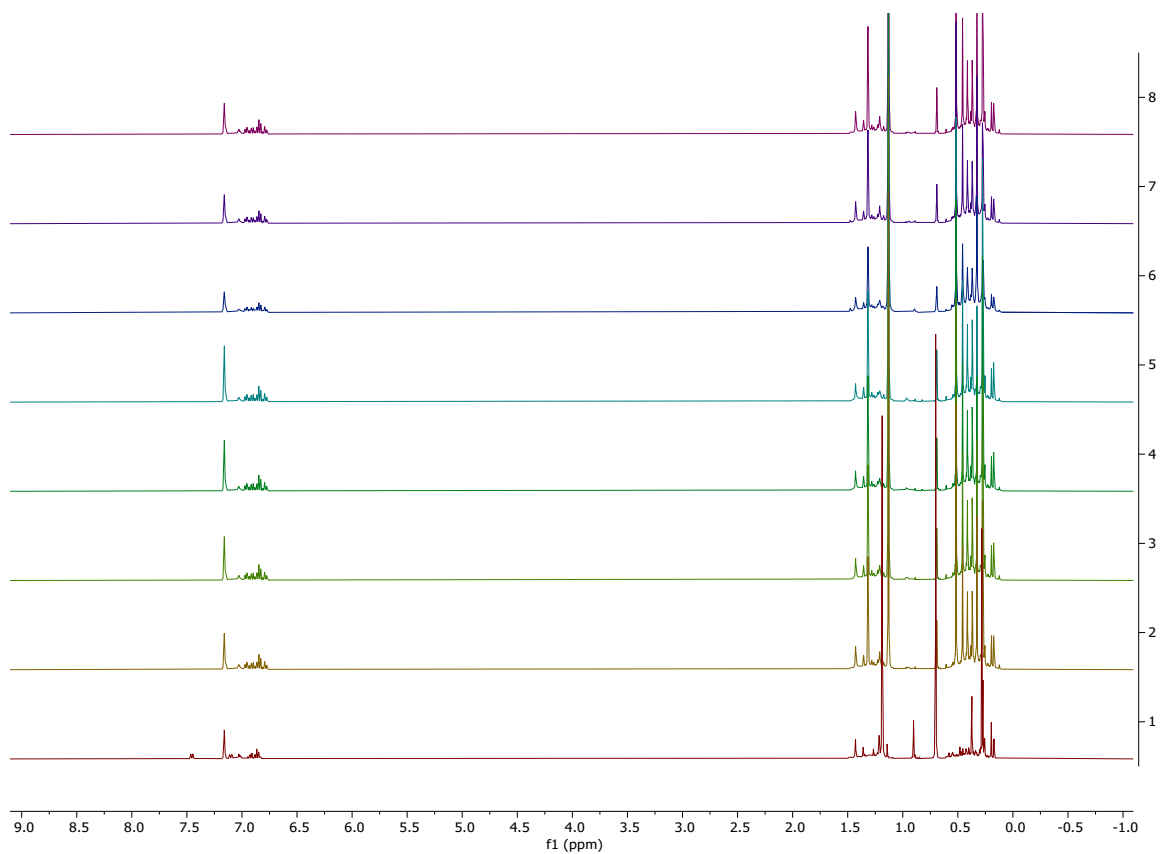

Figure S27. Stacked NMR for the reaction of **2** and S (Stacked NMR No. 1 is for pure disilene (**2**), and NMR No. 2 to 8 were taken in time interval of six minutes).

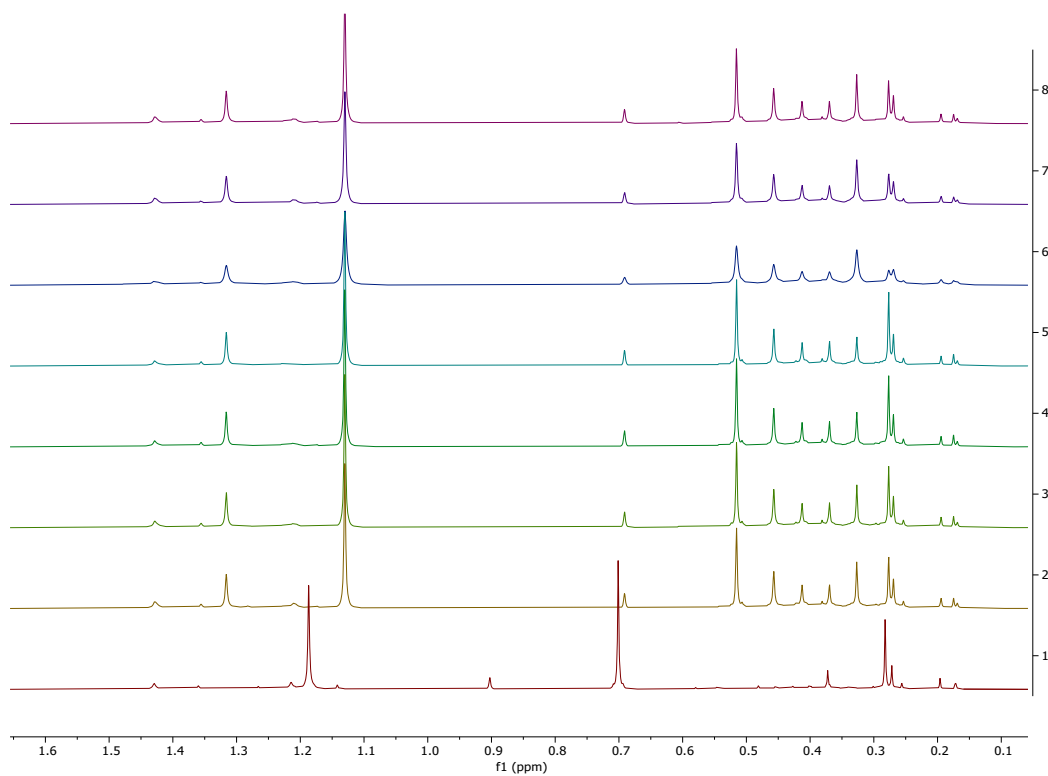

Figure S28. Cropped portion of the stacked NMR for the reaction of **2** and S (Stacked NMR No. 1 is for pure disilene (**2**), and NMR No. 2 to 8 were taken in time interval of six minutes).

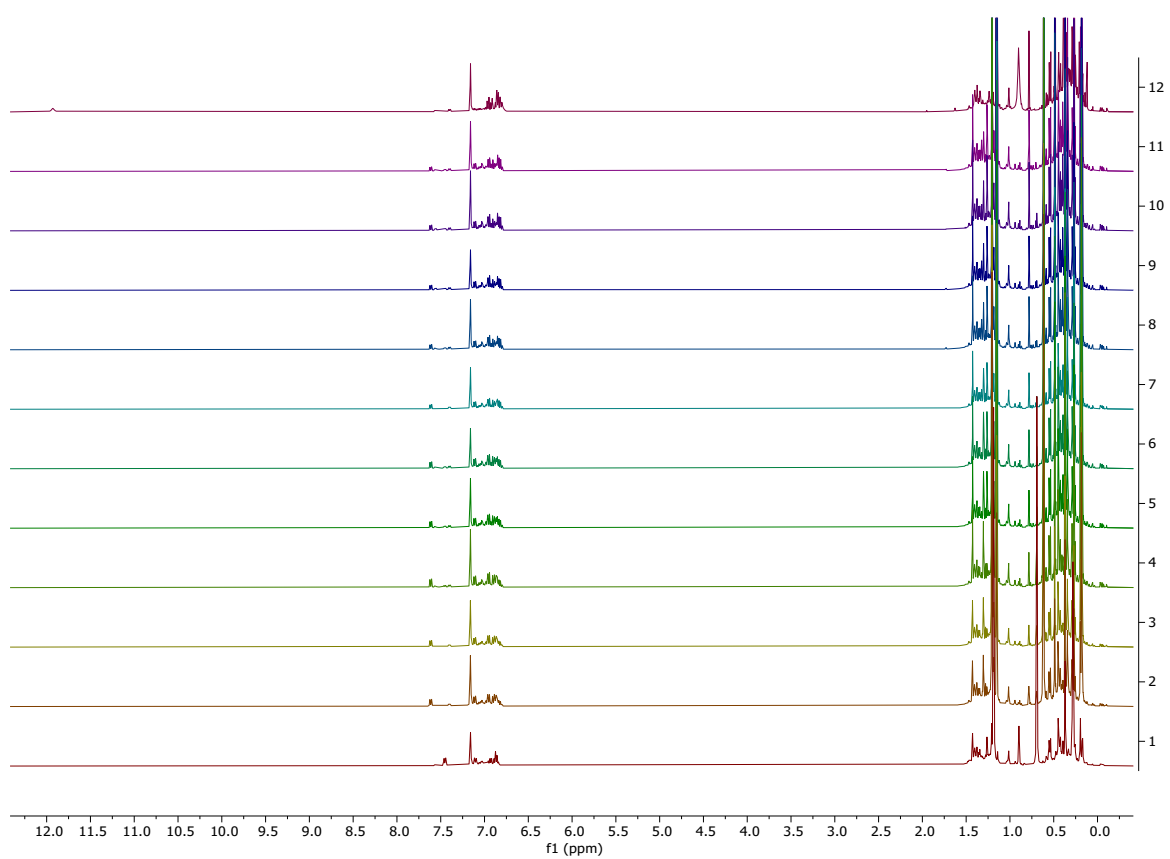

Figure S29. Stacked NMR for the reaction of **2** and Se (Stacked NMR No. 1 is for pure disilene (**2**), and NMR No. 2 to 11 were taken in time interval of six minutes, and NMR No. 12 was taken after 12 h).

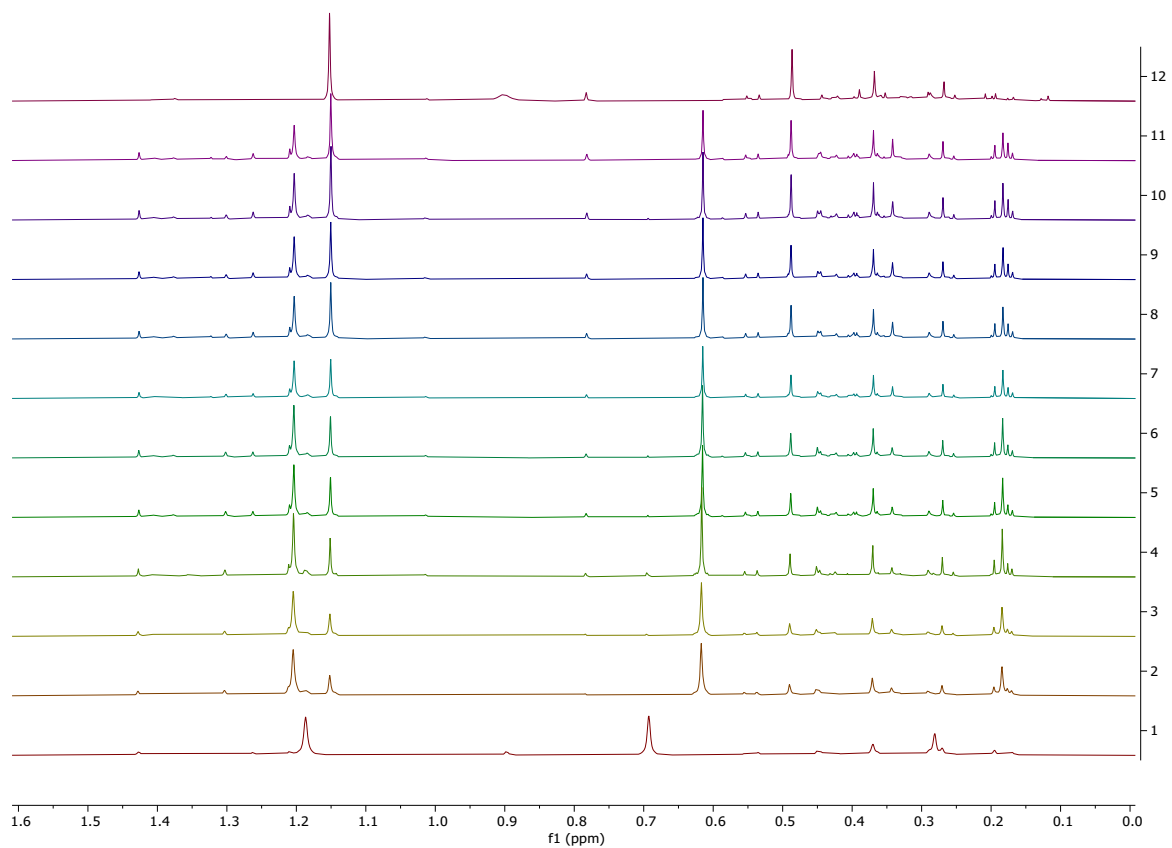

Figure S30. Cropped portion of the stacked NMR for the reaction of **2** and Se (Stacked NMR No. 1 is for pure disilene (**2**), and NMR No. 2 to 11 were taken in time interval of six minutes, and NMR No. 12 was taken after 12 h).

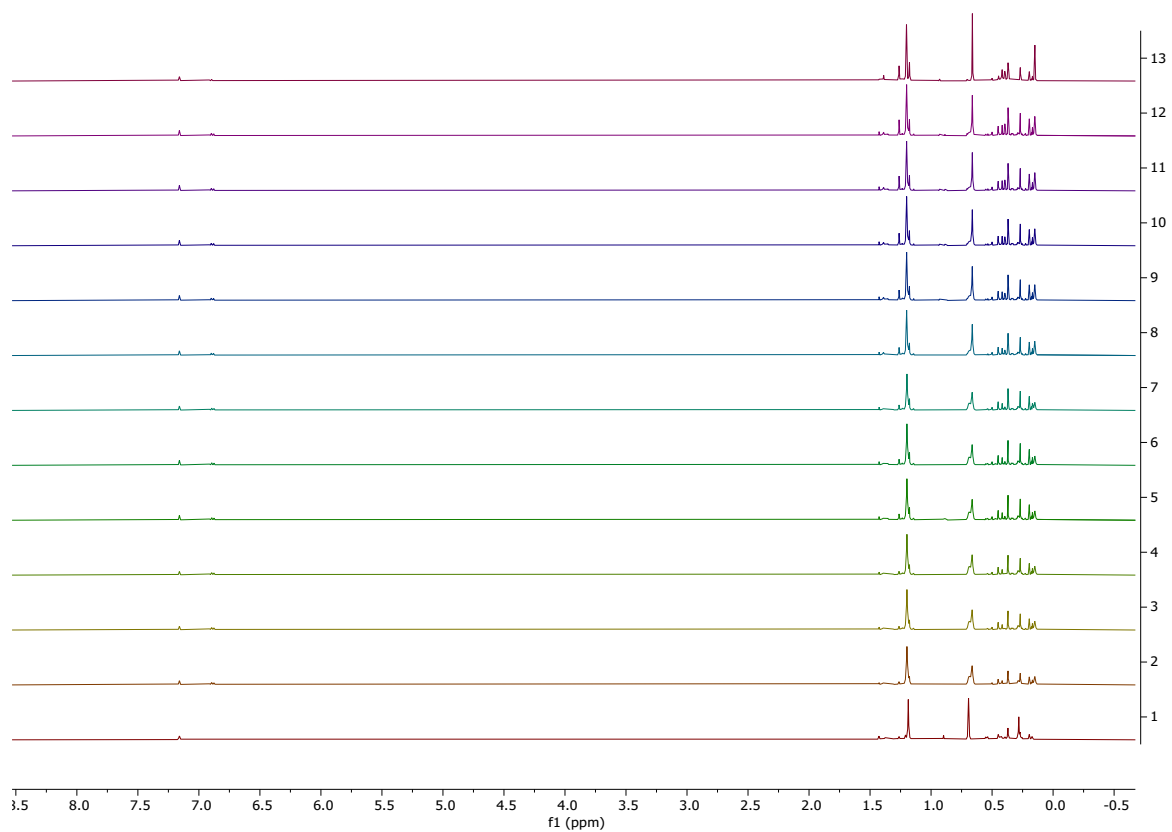

Figure S31. Stacked NMR for the reaction of **2** and Te (Stacked NMR No. 1 is for pure disilene (**2**), and NMR No. 2 to 12 were taken in time interval of six minutes, and NMR No. 13 was taken after 12 h).

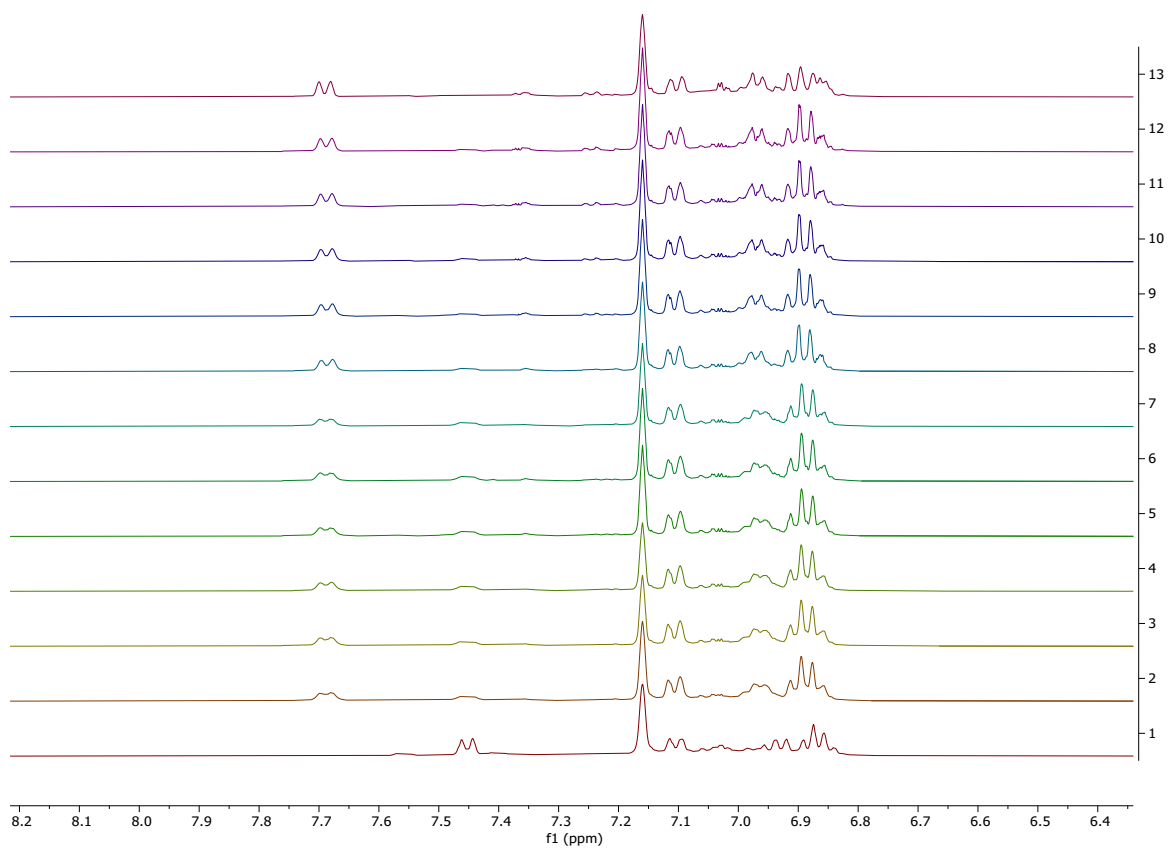

Figure S32. Cropped portion of the stacked NMR for the reaction of **2** and Te (Stacked NMR No. 1 is for pure disilene (**2**), and NMR No. 2 to 12 were taken in time interval of six minutes, and NMR No. 13 was taken after 12 h).

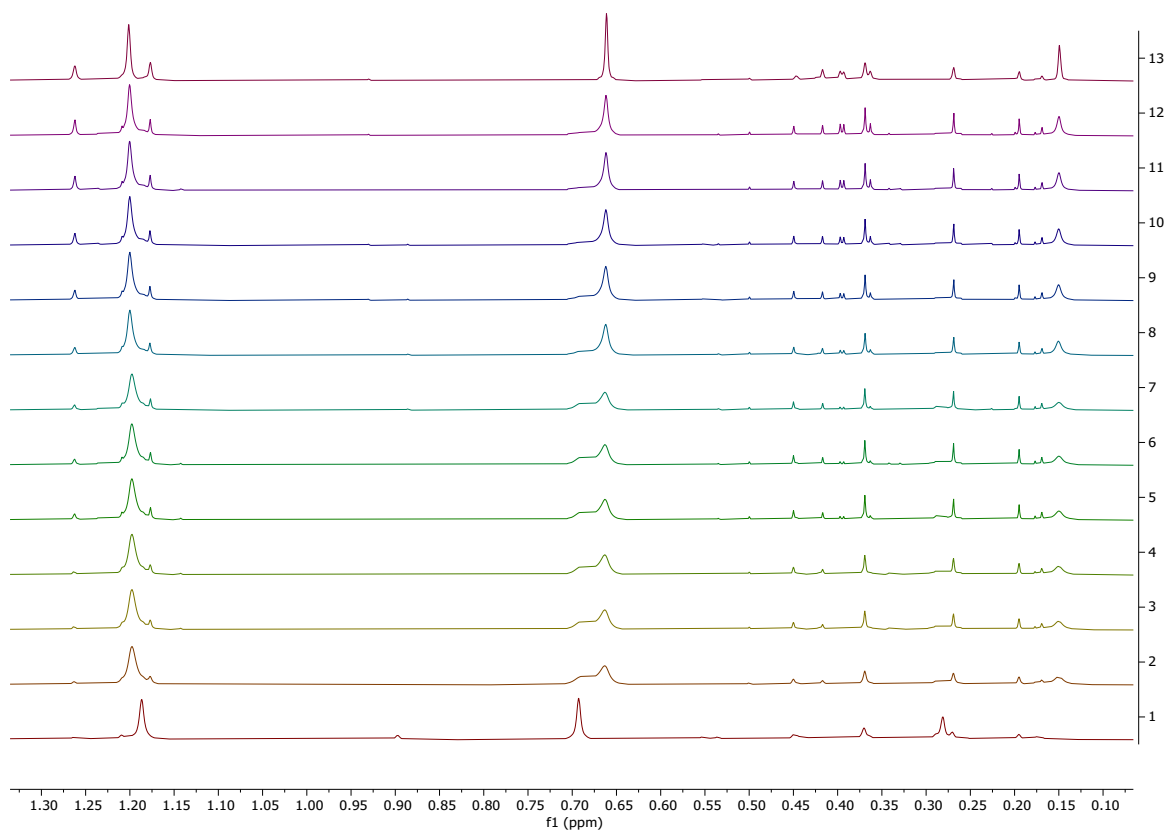

Figure S33. Cropped portion of the stacked NMR for the reaction of **2** and Te (Stacked NMR No. 1 is for pure disilene (**2**), and NMR No. 2 to 12 were taken in time interval of six minutes, and NMR No. 13 was taken after 12 h).

### Computational Details

All the calculations in this study have been performed with density functional theory (DFT), with the aid of the Turbomole 7.5 suite of programs,<sup>4</sup> using the PBE functional,<sup>5</sup> along with dispersion correction (DFT-D3)<sup>6</sup>. The def2-TZVP basis set<sup>7</sup> has been employed. The resolution of identity (RI),<sup>8</sup> along with the multipole accelerated resolution of identity (marij)<sup>9</sup> approximations have been employed for an accurate and efficient treatment of the electronic Coulomb term in the DFT calculations. Solvent corrections were incorporated with optimization calculations using the COSMO model,<sup>10</sup> with toluene ( $\epsilon = 2.374$ ) as the solvent. The values reported are  $\Delta G$  values, with zero-point energy corrections, internal energy and entropic contributions included through frequency calculations on the optimized minima, with the temperature taken to be 298.15 K. Harmonic frequency calculations were performed for all stationary points to confirm them as local minima or transition state structures. For accurate HOMO-LUMO energy gap values, we have optimized the geometries of compounds **2** and **6** at the B3LYP/6-31g(d) level of theory<sup>11</sup> using the Gaussian 09 suite of programs.<sup>12</sup> Furthermore, NBO calculations<sup>13</sup> have been done at the B3LYP/6-31g(d)//B3-LYP/6-311+g(d) level of theory. For both optimization and single-point calculations, we have employed an implicit solvent model (PCM, toluene as solvent).<sup>14</sup>

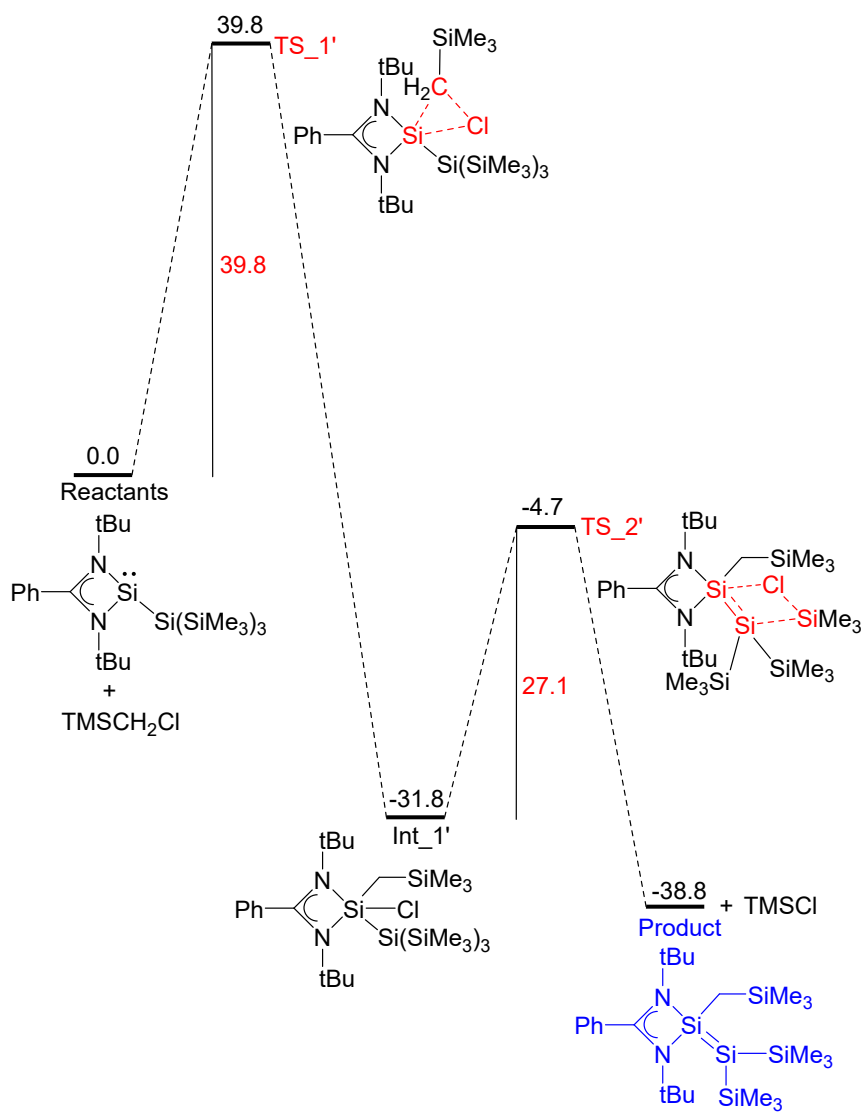

Figure S34. The free energy profile for the formation of **2**. Values are in kcal/mol.

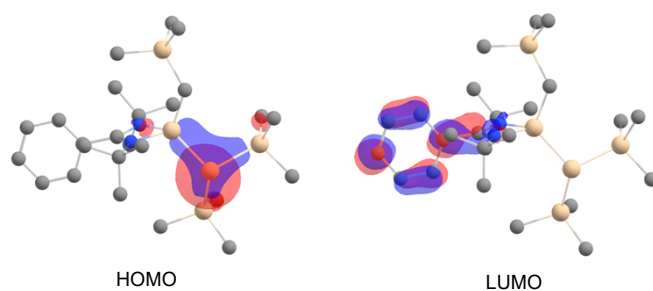

Figure S35. The HOMO and LUMO of **2** (with an iso-surface value of 0.05 a.u.).



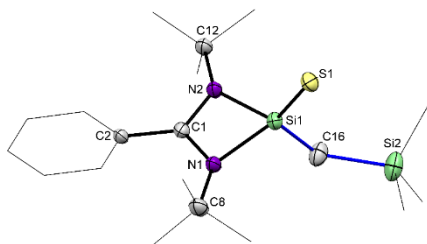

Figure S36. The molecular structure of **4**. Anisotropic displacement parameters are depicted at the 50% probability level. Hydrogen atoms are omitted for clarity. Selected bond distances (Å) and bond angles (deg): Si1-S1 1.9828(10), Si1-C16 1.861(3), Si2-C16 1.861(3); S1-Si1-C16 120.31(9), Si1-C16-Si2 120.80(15), N1-Si1-S1 117.85(8), N2-Si1-C16 107.62(11).

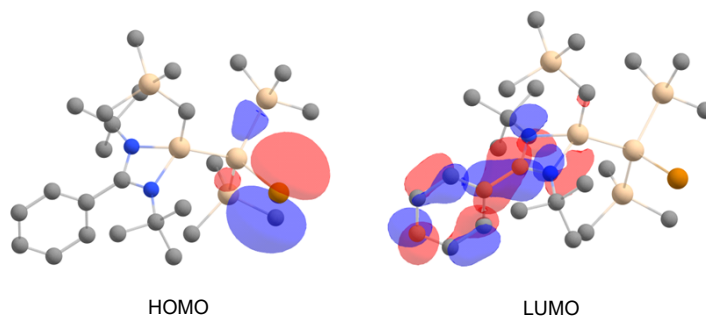

Figure S37. The HOMO and LUMO of **6** (with an iso-surface value of 0.04 a.u.).

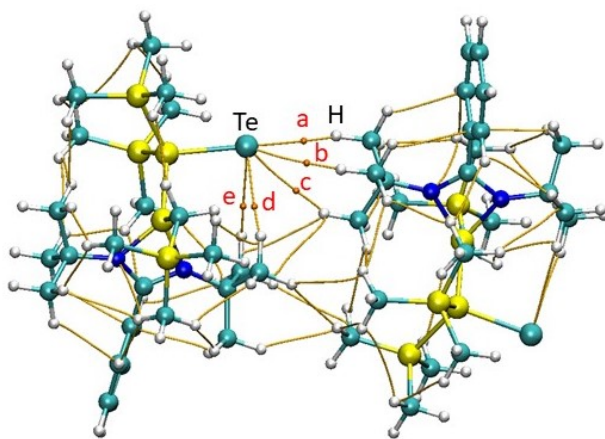

Figure S38. The bond critical points (a-e) for the inter- and intramolecular CH...Te interactions. For clarity, other bond critical points have been omitted.

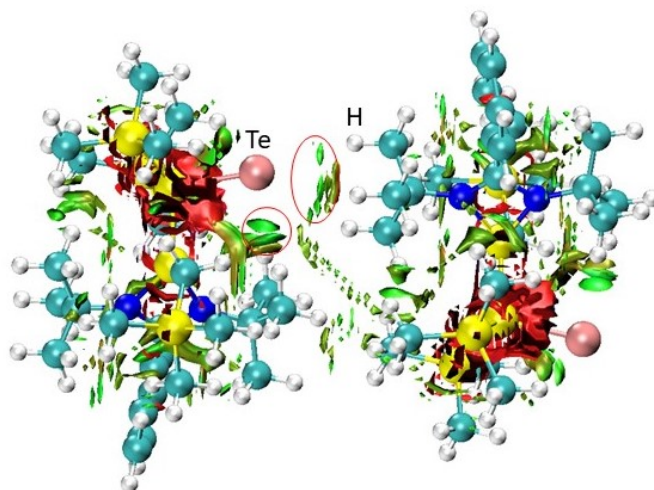

Figure S39. The NCI plot for the CH---Te interactions in the dimer. The red circles mark the isosurfaces corresponding to the inter- and intramolecular CH---Te interactions. In the NCI plot, blue, green, and red represent strong attraction, weak attraction, and strong repulsion, respectively.

#### Reaction with Me<sub>3</sub>NO.

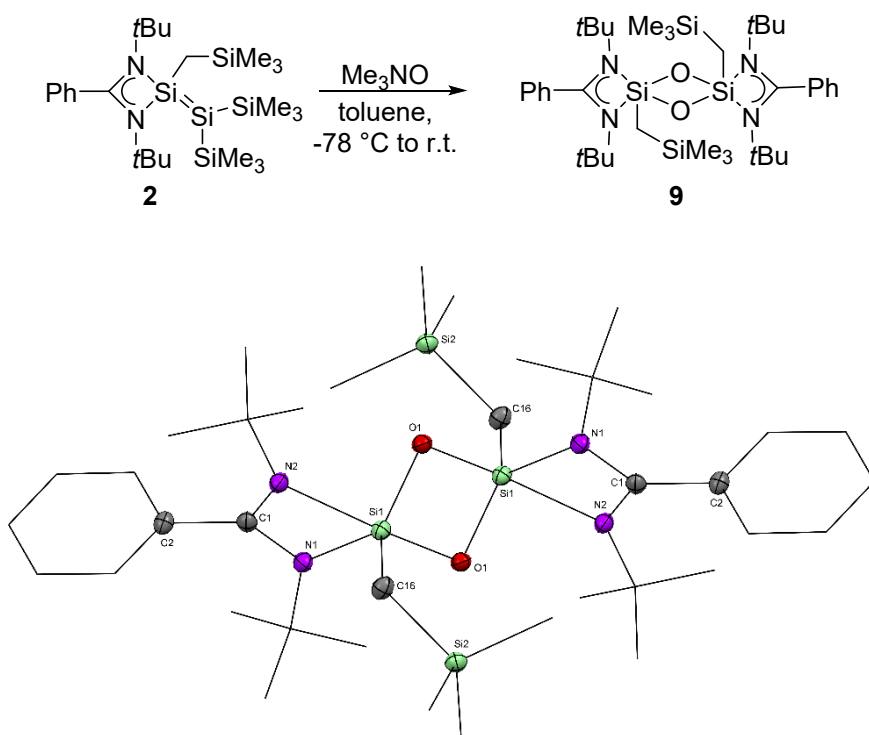

Figure S40. The molecular structure of **9**.

In spite of our several attempts, we were not able to prepare **9** in a reasonable scale. Though the molecular constitution of **9** is unequivocal, the data was not publishable and hence we refrain from discussing the structural parameters.

## Crystal Data and Structure Refinement for 2-6.

**X-ray Crystallography Details.** The single-crystal structures of all the compounds were solved using X-ray intensity data recorded on a Bruker D8 VENTURE Kappa Duo PHOTON II CPAD diffractometer equipped with Incoatech multilayer mirrors optics with X-ray generator power setting at 50 kV and 1.4 mA. The intensity measurements were carried out with Mo ( $\text{MoK}\alpha = 0.71073 \text{ \AA}$ ) micro-focus sealed tube diffraction source. For all the compounds, the unit cell parameters were determined using 36 frames (matrix runs). The full intensity data were collected using an optimized strategy that consisted of different sets of  $\omega$ ,  $\phi$  and  $2\theta$  with  $0.5^\circ$  width keeping the sample-to-detector distance fixed at 5.00 cm. The exposure time was set at 10-30 sec depending on the diffraction power of the crystals. The whole process of X-ray data acquisition was controlled and monitored by the APEX3<sup>15</sup> program suite. The complete data sets were corrected for Lorentz polarization and absorption effects using the APEX3 package through SAINT and SADABS programs. Using the APEX3 program suite, the structure was solved with the ShelXS-97<sup>16</sup> structure solution program, using direct methods. The model was refined with the version of ShelXL-2013<sup>17</sup> using Least Squares minimization. All the hydrogen atoms were placed in geometrically idealized positions and constrained to ride on their parent atoms. An ORTEP III<sup>18</sup> view of compounds **2-6** were drawn using the Mercury program<sup>18</sup> at the 50% probability displacement ellipsoids level and H atoms omitted for clarity.

### Crystal data for compounds 2-4 and 6:

**2.** ( $\text{C}_{25}\text{H}_{52}\text{N}_2\text{Si}_5$ ), red,  $0.21 \times 0.14 \times 0.09 \text{ mm}^3$ , monoclinic, space group ' $P2_1/n$ ',  $a = 17.9412(7) \text{ \AA}$ ,  $b = 10.1371(4) \text{ \AA}$ ,  $c = 18.4496(8) \text{ \AA}$ ,  $\alpha = \gamma = 90$ ,  $\beta = 103.9940(10)$ ,  $V = 3255.9(2) \text{ \AA}^3$ ,  $Z = 4$ ,  $T = 100$  (2) K,  $2\theta_{\text{max}} = 74.84^\circ$ ,  $D_{\text{calc}} (\text{g cm}^{-3}) = 1.063$ ,  $F(000) = 1144$ ,  $\mu (\text{mm}^{-1}) = 0.235$ , 203335 reflections collected, 7850 unique reflections ( $R_{\text{int}} = 0.0721$ ), 7074 observed ( $I > 2\sigma(I)$ ) reflections, multi-scan absorption correction,  $T_{\text{min}} = 0.6744$ ,  $T_{\text{max}} = 0.7475$ , 304 refined parameters,  $S = 1.041$ ,  $R1 = 0.0349$ ,  $wR2 = 0.0997$  (all data  $R = 0.0388$ ,  $wR2 = 0.1028$ ), maximum and minimum residual electron densities;  $\Delta\rho_{\text{max}} = 0.868$ ,  $\Delta\rho_{\text{min}} = -0.479 (\text{e}\text{\AA}^{-3})$ . CCDC: 2214132.

**3.** ( $\text{C}_{19}\text{H}_{34}\text{Cl}_2\text{N}_2\text{Si}_2$ ), yellow,  $0.21 \times 0.15 \times 0.08 \text{ mm}^3$ , monoclinic, space group ' $P2_1/n$ ',  $a = 6.2615(5) \text{ \AA}$ ,  $b = 19.9686(14) \text{ \AA}$ ,  $c = 18.2262(11) \text{ \AA}$ ,  $\alpha = \gamma = 90$ ,  $\beta = 98.455(2)$ ,  $V = 2254.1(3) \text{ \AA}^3$ ,  $Z = 4$ ,  $T = 196$  (2) K,  $2\theta_{\text{max}} = 56.56^\circ$ ,  $D_{\text{calc}} (\text{g cm}^{-3}) = 1.230$ ,  $F(000) = 896$ ,  $\mu (\text{mm}^{-1}) = 0.400$ , 124670 reflections collected, 5802 unique reflections ( $R_{\text{int}} = 0.0752$ ), 4783 observed ( $I > 2\sigma(I)$ ) reflections, multi-scan absorption correction,  $T_{\text{min}} = 0.6823$ ,  $T_{\text{max}} = 0.7457$ , 235 refined parameters,  $S = 1.079$ ,  $R1 = 0.0327$ ,  $wR2 = 0.0795$  (all data  $R = 0.0454$ ,  $wR2 = 0.0842$ ), maximum and minimum residual electron densities;  $\Delta\rho_{\text{max}} = 0.360$ ,  $\Delta\rho_{\text{min}} = -0.391 (\text{e}\text{\AA}^{-3})$ . CCDC: 2214133.

**4.** ( $\text{C}_{19}\text{H}_{34}\text{N}_2\text{SSi}_2$ ), yellow,  $0.22 \times 0.13 \times 0.06 \text{ mm}^3$ , monoclinic, space group ' $C2/c$ ',  $a = 29.526(5) \text{ \AA}$ ,  $b = 8.6554(15) \text{ \AA}$ ,  $c = 17.895(3) \text{ \AA}$ ,  $\alpha = \gamma = 90$ ,  $\beta = 94.568(4)$ ,  $V = 4558.6(13) \text{ \AA}^3$ ,  $Z = 8$ ,  $T = 100$  (2) K,

$2\theta_{\max} = 56.81^\circ$ ,  $D_{\text{calc}} (\text{g cm}^{-3}) = 1.104$ ,  $F(000) = 1648$ ,  $\mu (\text{mm}^{-1}) = 0.251$ , 109201 reflections collected, 5716 unique reflections ( $R_{\text{int}} = 0.1790$ ), 4170 observed ( $I > 2\sigma(I)$ ) reflections, multi-scan absorption correction,  $T_{\text{min}} = 0.4741$ ,  $T_{\text{max}} = 0.7457$ , 231 refined parameters,  $S = 1.210$ ,  $R1 = 0.0627$ ,  $wR2 = 0.1755$  (all data  $R = 0.0952$ ,  $wR2 = 0.1937$ ), maximum and minimum residual electron densities;  $\Delta\rho_{\text{max}} = 0.712$ ,  $\Delta\rho_{\text{min}} = -0.600 (\text{e}\text{\AA}^{-3})$ . CCDC: 2214134.

6. ( $\text{C}_{25}\text{H}_{52}\text{N}_2\text{Si}_5\text{Te}$ ), red,  $0.21 \times 0.17 \times 0.13 \text{ mm}^3$ , orthorhombic, space group 'P21 21 21',  $a = 14.873(3) \text{ \AA}$ ,  $b = 19.141(3) \text{ \AA}$ ,  $c = 12.115(2) \text{ \AA}$ ,  $\alpha = \beta = \gamma = 90$ ,  $V = 3449.0(10) \text{ \AA}^3$ ,  $Z = 4$ ,  $T = 100 (2) \text{ K}$ ,  $2\theta_{\max} = 64.36^\circ$ ,  $D_{\text{calc}} (\text{g cm}^{-3}) = 1.249$ ,  $F(000) = 1352$ ,  $\mu (\text{mm}^{-1}) = 1.052$ , 93617 reflections collected, 8306 unique reflections ( $R_{\text{int}} = 0.1015$ ), 7441 observed ( $I > 2\sigma(I)$ ) reflections, multi-scan absorption correction,  $T_{\text{min}} = 0.6002$ ,  $T_{\text{max}} = 0.7470$ , 313 refined parameters,  $S = 1.108$ ,  $R1 = 0.0548$ ,  $wR2 = 0.1367$  (all data  $R = 0.0659$ ,  $wR2 = 0.1472$ ), maximum and minimum residual electron densities;  $\Delta\rho_{\text{max}} = 2.549$ ,  $\Delta\rho_{\text{min}} = -1.134 (\text{e}\text{\AA}^{-3})$ . CCDC: 2214136.

## References:

1. M. K. Bisai, V. S. V. S. N. Swamy, T. Das, K. Vanka, R. G. Gonnade and S. S. Sen, *Inorg. Chem.* 2019, **58**, 10536–10542.
2. S. S. Sen, H. W. Roesky, D. Stern, J. Henn and D. Stalke, *J. Am. Chem. Soc.* 2010, **132**, 1123–1126.
3. C. Marschner, *Eur. J. Inorg. Chem.* 1998, 221–226.
4. TURBOMOLE V7.5 2020, a development of University of Karlsruhe and Forschungszentrum Karlsruhe GmbH, 1989-2007, TURBOMOLE GmbH, since 2007; available from <http://www.turbomole.org>.
5. J. P. Perdew, K. Burke and M. Ernzerhof, *Phys. Rev. Lett.* 1996, **77**, 3865–3868.
6. S. Grimme, J. Antony, S. Ehrlich and H. Krieg, *J. Chem. Phys.* 2010, **132**, 154104 (1-19).
7. F. Weigend and R. Ahlrichs, *Phys. Chem. Chem. Phys.*, 2005, **7**, 3297-3305.
8. K. Eichkorn, O. Treutler, H. Öhm, M. Häser and R. Ahlrichs, *Phys. Lett.* 1995, **240**, 283–289.
9. M. Sierka, A. Hoge Kamp and R. Ahlrichs, *J. Chem. Phys.* 2003, **118**, 9136–9148.
10. A. Klamt and G. Schüürmann, *J. Chem. Soc., Perkin Trans.* 1993, 799–805.
11. A. D. Becke, *J. Chem. Phys.* 1993, **98**, 5648-5652.
12. M. J. Frisch, G. W. Trucks, H. B. Schlegel, G. E. Scuseria, M. A. Robb, J. R. Cheeseman, G. Scalmani, V. Barone, B. Mennucci, G. A. Petersson, H. Nakatsuji, M. Caricato, X. Li, H. P. Hratchian, A. F. Izmaylov, J. Bloino, G. Zheng, J. L. Sonnenberg, M. Hada, M. Ehara, K. Toyota, R. Fukuda, J. Hasegawa, M. Ishida, T. Nakajima, Y. Honda, O. Kitao, H. Nakai, T. Vreven, J. A. Montgomery, Jr., J. E. Peralta, F. Ogliaro, M. Bearpark, J. J. Heyd, E. Brothers, K. N. Kudin, V. N. Staroverov, T. Keith, R. Kobayashi, J. Normand, K. Raghavachari, A. Rendell, J. C. Burant, S. S. Iyengar, J. Tomasi, M. Cossi, S. N. Rega, J. M. Millam, M. Klene, J. E. Knox, J. B. Cross, V. Bakken, C. Adamo, J. Jaramillo, R. Gomperts, R. E. Stratmann, O. Yazyev, A. J. Austin, R. Cammi,

- C. Pomelli, J. W. Ochterski, R. L. Martin, K. Morokuma, V. G. Zakrzewski, G. A. Voth, P. Salvador, J. J. Dannenberg, S. Dapprich, A. D. Daniels, O. Farkas, J. B. Foresman, J. V. Ortiz and J. Cioslowski, D. J. Fox, Gaussian 09, rev. E.01; Gaussian, Inc., Wallingford, CT, 2013.
13. E. D. Glendening, A. E. Reed and J. E. Carpenter, F. Weinhold, NBO Version 3.1. Gaussian Inc., Pittsburgh. 2003.
14. S. Miertuš, E. Scrocco and J. Tomasi, *Chem. Phys.* 1981, **55**, 117-129.
15. Bruker (2006). APEX2, SAINT and SADABS. Bruker AXS Inc. Madison, Wisconsin, USA.
16. G. M. Sheldrick, *Acta Crystallogr.* 2008, **A64**, 112-122.
17. L. J. Farrugia, ORTEP-3 for Windows - a version of ORTEP-III with a Graphical User Interface (GUI) *J. Appl. Cryst.* 1997, **30**, 565.
18. C. F. Macrae, I. Sovago, S. J. Cottrell, P. T. A. Galek, P. McCabe, E. Pidcock, M. Platings, G. P. Shields, J. S. Stevens, M. Towler and P. A. Wood, *J. Appl. Cryst.* 2020, **53**, 226–235.

## (II) PBE-D3/def2-TZVP optimized geometries of all structures discussed in the paper

|              |           |           |   |           |           |   |           |           |
|--------------|-----------|-----------|---|-----------|-----------|---|-----------|-----------|
| (1) <b>1</b> |           |           | H | 4.020117  | 15.194298 | C | -0.255498 | 11.437350 |
| 81           |           |           |   | 6.222011  |           |   | 10.899792 |           |
|              |           |           | H | 4.435609  | 16.929159 | H | -0.654624 | 12.462271 |
| C            | 0.691850  | 15.193622 |   | 6.283204  |           |   | 10.883291 |           |
| 5.246979     |           |           | H | 3.547562  | 16.273642 | H | 0.661722  | 11.439689 |
| C            | 0.814529  | 15.926869 |   | 4.888325  |           |   | 11.504837 |           |
| 3.955919     |           |           | C | 1.839554  | 17.909363 | H | -0.991811 | 10.791249 |
| C            | -0.019758 | 17.017760 |   | 6.323019  |           |   | 11.404451 |           |
| 3.666454     |           |           | H | 1.782819  | 18.051830 | C | 0.842229  | 9.072425  |
| H            | -0.751969 | 17.345419 |   | 5.237607  |           |   | 9.258278  |           |
| 4.405824     |           |           | H | 2.533872  | 18.661849 | H | 0.203977  | 8.421291  |
| C            | 0.096283  | 17.694486 |   | 6.724778  |           |   | 9.877583  |           |
| 2.451525     |           |           | H | 0.845562  | 18.092511 | H | 1.843675  | 9.095647  |
| H            | -0.557145 | 18.542906 |   | 6.756411  |           |   | 9.707135  |           |
| 2.241272     |           |           | C | -1.270108 | 13.634628 | H | 0.926906  | 8.610074  |
| C            | 1.048324  | 17.290084 |   | 4.732452  |           |   | 8.263829  |           |
| 1.511327     |           |           | C | -0.775971 | 13.130162 | C | -1.662039 | 10.516500 |
| H            | 1.137966  | 17.819042 |   | 3.366273  |           |   | 8.381754  |           |
| 0.560988     |           |           | H | -0.454868 | 13.955359 | H | -2.199748 | 9.785106  |
| C            | 1.886739  | 16.208951 |   | 2.718205  |           |   | 9.007127  |           |
| 1.794102     |           |           | H | -1.590189 | 12.596480 | H | -1.609163 | 10.112952 |
| H            | 2.633575  | 15.888254 |   | 2.855032  |           |   | 7.361023  |           |
| 1.065919     |           |           | H | 0.068012  | 12.437785 | H | -2.255274 | 11.440601 |
| C            | 1.772029  | 15.531609 |   | 3.489416  |           |   | 8.356742  |           |
| 3.009722     |           |           | C | -2.394033 | 14.671164 | C | 2.665265  | 13.888602 |
| H            | 2.424148  | 14.683972 |   | 4.541523  |           |   | 10.916739 |           |
| 3.224902     |           |           | H | -2.700968 | 15.082499 | H | 1.871501  | 13.437860 |
| C            | 2.340183  | 16.502383 |   | 5.514129  |           |   | 11.529096 |           |
| 6.698845     |           |           | H | -3.268256 | 14.194472 | H | 2.285946  | 14.845661 |
| C            | 2.555593  | 16.460351 |   | 4.074188  |           |   | 10.537145 |           |
| 8.215094     |           |           | H | -2.074719 | 15.496134 | H | 3.523440  | 14.096732 |
| H            | 1.628034  | 16.715341 |   | 3.892702  |           |   | 11.576170 |           |
| 8.748380     |           |           | C | -1.826596 | 12.459615 | C | 3.730518  | 11.098305 |
| H            | 3.336275  | 17.174367 |   | 5.541192  |           |   | 10.429127 |           |
| 8.511138     |           |           | H | -1.050198 | 11.707495 | H | 4.576039  | 11.330749 |
| H            | 2.871034  | 15.459096 |   | 5.725288  |           |   | 11.096892 |           |
| 8.530001     |           |           | H | -2.658093 | 11.982038 | H | 4.057679  | 10.321571 |
| C            | 3.666282  | 16.204906 |   | 5.005054  |           |   | 9.724459  |           |
| 5.977696     |           |           | H | -2.202542 | 12.810444 | H | 2.921128  | 10.683768 |
|              |           |           |   | 6.513145  |           |   | 11.045648 |           |

|                           |           |           |          |           |           |           |           |           |
|---------------------------|-----------|-----------|----------|-----------|-----------|-----------|-----------|-----------|
| C                         | 4.790781  | 13.354786 | C        | 2.701003  | -0.075250 | H         | 1.745253  | 18.133140 |
| 8.731723                  |           |           | 0.327948 |           |           | 7.600368  |           |           |
| H                         | 4.652463  | 14.316685 | H        | 2.703995  | -0.125256 | C         | -0.174326 | 14.479138 |
| 8.222160                  |           |           | 1.427242 |           |           | 3.997079  |           |           |
| H                         | 5.179114  | 12.638345 | H        | 3.229029  | -0.960754 | C         | 0.753732  | 14.026791 |
| 7.992820                  |           |           | 0.054962 |           |           | 2.856750  |           |           |
| H                         | 5.563244  | 13.491796 | H        | 3.269660  | 0.817658  | H         | 1.413709  | 14.841352 |
| 9.505768                  |           |           | 0.027701 |           |           | 2.532968  |           |           |
| C                         | 3.869904  | 9.896673  | C        | 0.996313  | 0.022397  | H         | 0.151667  | 13.713328 |
| 6.783985                  |           |           | 2.236518 |           |           | 1.991683  |           |           |
| H                         | 3.480431  | 9.157344  | H        | -0.010917 | 0.049935  | H         | 1.377876  | 13.179481 |
| 7.498749                  |           |           | 2.674826 |           |           | 3.168727  |           |           |
| H                         | 4.688674  | 10.442141 | H        | 1.559620  | 0.885638  | C         | -0.990324 | 15.701945 |
| 7.274075                  |           |           | 2.616871 |           |           | 3.542152  |           |           |
| H                         | 4.293861  | 9.349741  | Cl       | 1.807074  | -1.457214 | H         | -1.623060 | 16.075008 |
| 5.925876                  |           |           | 2.906585 |           |           | 4.358108  |           |           |
| C                         | 1.257462  | 9.965525  | (3) TS_1 |           |           | H         | -1.643594 | 15.413266 |
| 5.245117                  |           |           | 98       |           |           | 2.706136  |           |           |
| H                         | 1.794328  | 9.374423  |          |           |           | H         | -0.343765 | 16.517455 |
| 4.485599                  |           |           | C        | 1.585376  | 15.645698 | 3.197280  |           |           |
| H                         | 0.488842  | 10.555972 | 5.455028 |           |           | C         | -1.144339 | 13.351268 |
| 4.728961                  |           |           | C        | 2.150860  | 16.625778 | 4.360137  |           |           |
| H                         | 0.746123  | 9.263179  | 4.490172 |           |           | H         | -0.600165 | 12.470342 |
| 5.919310                  |           |           | C        | 1.523246  | 17.863939 | 4.723803  |           |           |
| C                         | 3.252862  | 12.261783 | 4.284192 |           |           | H         | -1.736713 | 13.056181 |
| 4.920390                  |           |           | H        | 0.616687  | 18.106856 | 3.483964  |           |           |
| H                         | 3.700471  | 11.719648 | 4.841061 |           |           | H         | -1.838134 | 13.676623 |
| 4.072239                  |           |           | C        | 2.062024  | 18.784370 | 5.148805  |           |           |
| H                         | 4.031803  | 12.887220 | 3.385383 |           |           | C         | -1.308281 | 10.850138 |
| 5.380129                  |           |           | H        | 1.567173  | 19.745259 | 9.700639  |           |           |
| H                         | 2.470985  | 12.929581 | 3.235030 |           |           | H         | -1.606156 | 11.873083 |
| 4.532988                  |           |           | C        | 3.231357  | 18.477884 | 9.975012  |           |           |
| N                         | -0.159533 | 14.187295 | 2.683456 |           |           | H         | -0.565600 | 10.511824 |
| 5.533422                  |           |           | H        | 3.651556  | 19.198807 | 10.436155 |           |           |
| N                         | 1.351705  | 15.449505 | 1.980235 |           |           | H         | -2.195891 | 10.204488 |
| 6.393603                  |           |           | C        | 3.861490  | 17.247758 | 9.802046  |           |           |
| Si                        | 0.194653  | 14.320996 | 2.885150 |           |           | C         | -0.185934 | 8.889909  |
| 7.399445                  |           |           | H        | 4.774541  | 17.002487 | 7.638641  |           |           |
| Si                        | 1.479223  | 12.290500 | 2.340291 |           |           | H         | -1.038262 | 8.241840  |
| 7.936491                  |           |           | C        | 3.325042  | 16.325001 | 7.899653  |           |           |
| Si                        | 0.053380  | 10.796519 | 3.785257 |           |           | H         | 0.668734  | 8.590289  |
| 9.140408                  |           |           | H        | 3.816278  | 15.362597 | 8.261048  |           |           |
| Si                        | 3.203469  | 12.693208 | 3.938620 |           |           | H         | 0.074771  | 8.696789  |
| 9.542557                  |           |           | C        | 2.875497  | 16.259492 | 6.588653  |           |           |
| Si                        | 2.497967  | 11.060692 | 7.585156 |           |           | C         | -2.153361 | 11.058865 |
| 6.176711                  |           |           | C        | 2.561467  | 15.900979 | 6.794686  |           |           |
| (2) TMSCH <sub>2</sub> Cl |           |           | 9.041074 |           |           | H         | -2.979827 | 10.390345 |
| 17                        |           |           | H        | 1.580806  | 16.295108 | 7.085123  |           |           |
| Si                        | 0.940963  | -0.009697 | 9.340801 |           |           | H         | -1.926004 | 10.875768 |
| 0.330840                  |           |           | H        | 3.321751  | 16.321157 | 5.735760  |           |           |
| C                         | 0.086312  | 1.583718  | 9.712921 |           |           | H         | -2.510126 | 12.093851 |
| 0.205616                  |           |           | H        | 2.554208  | 14.812019 | 6.895304  |           |           |
| H                         | -0.942532 | 1.636442  | 9.174158 |           |           | C         | 1.654670  | 12.801583 |
| 0.180892                  |           |           | C        | 4.296674  | 15.791388 | 11.017787 |           |           |
| H                         | 0.036436  | 1.640688  | 7.226788 |           |           | H         | 0.581399  | 12.587632 |
| 1.303642                  |           |           | H        | 4.378774  | 14.700338 | 11.112353 |           |           |
| H                         | 0.631310  | 2.470099  | 7.316631 |           |           | H         | 1.768628  | 13.891596 |
| 0.152480                  |           |           | H        | 5.029644  | 16.254756 | 10.950174 |           |           |
| C                         | -0.045696 | -1.513083 | 7.902715 |           |           | H         | 2.147903  | 12.476128 |
| 0.219010                  |           |           | H        | 4.554820  | 16.073784 | 11.948287 |           |           |
| H                         | -1.065314 | -1.487638 | 6.197693 |           |           | C         | 2.507128  | 10.045210 |
| 0.193887                  |           |           | C        | 2.773967  | 17.786900 | 10.056203 |           |           |
| H                         | 0.435402  | -2.442190 | 7.426844 |           |           | H         | 3.119625  | 9.952615  |
| 0.119314                  |           |           | H        | 3.095761  | 18.124510 | 10.967610 |           |           |
| H                         | -0.124964 | -1.548637 | 6.434785 |           |           | H         | 2.963524  | 9.421568  |
| 1.315895                  |           |           | H        | 3.423605  | 18.267348 | 9.276168  |           |           |
|                           |           |           | 8.172695 |           |           |           |           |           |

|           |           |           |           |           |           |          |           |           |   |
|-----------|-----------|-----------|-----------|-----------|-----------|----------|-----------|-----------|---|
| H         | 1.510844  | 9.641681  | H         | -0.089371 | 17.745057 | H        | -2.026005 | -2.502017 | - |
| 10.279774 |           |           | 10.137615 |           |           | 2.666341 |           |           |   |
| C         | 4.257657  | 12.425331 | H         | -1.614637 | 18.654329 | C        | 2.482225  | 0.582175  | - |
| 9.405458  |           |           | 10.132030 |           |           | 1.959253 |           |           |   |
| H         | 4.365987  | 13.506341 | C         | -3.756245 | 16.447037 | C        | 2.501998  | 1.984992  | - |
| 9.249133  |           |           | 8.911300  |           |           | 2.588157 |           |           |   |
| H         | 4.760713  | 11.910576 | H         | -4.126119 | 15.748466 | H        | 2.010013  | 1.995539  | - |
| 8.574460  |           |           | 8.144890  |           |           | 3.568139 |           |           |   |
| H         | 4.792413  | 12.168140 | H         | -4.123960 | 16.108315 | H        | 3.544091  | 2.303565  | - |
| 10.334207 |           |           | 9.887940  |           |           | 2.730724 |           |           |   |
| C         | 3.619679  | 9.651889  | H         | -4.178968 | 17.439859 | H        | 2.004226  | 2.719290  | - |
| 6.466832  |           |           | 8.692876  |           |           | 1.942458 |           |           |   |
| H         | 2.979312  | 8.846035  | Cl        | -2.134082 | 14.409335 | C        | 3.100549  | -0.430697 | - |
| 6.853546  |           |           | 11.103884 |           |           | 2.935845 |           |           |   |
| H         | 4.310422  | 9.953508  | H         | -0.208774 | 14.567808 | H        | 3.089168  | -1.440863 | - |
| 7.266333  |           |           | 9.556472  |           |           | 2.508021 |           |           |   |
| H         | 4.219538  | 9.238442  | (4) Int_1 |           |           | H        | 4.145903  | -0.152380 | - |
| 5.639723  |           |           | 98        |           |           | 3.131924 |           |           |   |
| C         | 1.567541  | 10.409968 |           |           |           | H        | 2.570332  | -0.445979 | - |
| 4.376754  |           |           | C         | -0.028226 | 0.123668  | -        | 3.895632  |           |   |
| H         | 2.251953  | 10.012624 | 2.300447  |           |           | C        | 3.297499  | 0.573520  | - |
| 3.609710  |           |           | C         | -0.183343 | 0.456135  | -        | 0.662656  |           |   |
| H         | 0.930066  | 11.163810 | 3.741405  |           |           | H        | 2.847649  | 1.229821  |   |
| 3.897363  |           |           | C         | 0.117410  | -0.499693 | -        | 0.093416  |           |   |
| H         | 0.919143  | 9.586317  | 4.722498  |           |           | H        | 4.320279  | 0.923260  | - |
| 4.707344  |           |           | H         | 0.457814  | -1.493009 | -        | 0.855634  |           |   |
| C         | 3.781305  | 12.407818 | 4.428554  |           |           | H        | 3.361634  | -0.441150 | - |
| 5.134084  |           |           | C         | -0.031291 | -0.185577 | -        | 0.246527  |           |   |
| H         | 4.378468  | 11.991562 | 6.073822  |           |           | C        | 0.886849  | -0.754479 |   |
| 4.307220  |           |           | H         | 0.200606  | -0.937885 | -        | 4.585644  |           |   |
| H         | 4.473674  | 12.758026 | 6.829044  |           |           | H        | 0.605556  | -1.676767 |   |
| 5.913276  |           |           | C         | -0.476285 | 1.082336  | -        | 4.047282  |           |   |
| H         | 3.229894  | 13.280385 | 6.455644  |           |           | H        | -0.001151 | -0.421907 |   |
| 4.757539  |           |           | H         | -0.590433 | 1.326308  | -        | 5.141889  |           |   |
| N         | 0.607832  | 14.744967 | 7.512968  |           |           | H        | 1.668102  | -1.005333 |   |
| 5.223384  |           |           | C         | -0.776469 | 2.036833  | -        | 5.322115  |           |   |
| N         | 1.891265  | 15.525625 | 5.480714  |           |           | C        | 1.825689  | 2.175249  |   |
| 6.763158  |           |           | H         | -1.124048 | 3.029246  | -        | 4.469490  |           |   |
| Si        | 0.453965  | 14.348817 | 5.771139  |           |           | H        | 2.494562  | 1.937597  |   |
| 7.059027  |           |           | C         | -0.634622 | 1.726631  | -        | 5.312524  |           |   |
| Si        | 1.236686  | 12.093930 | 4.127850  |           |           | H        | 0.887894  | 2.567332  |   |
| 7.509475  |           |           | H         | -0.867497 | 2.476305  | -        | 4.886035  |           |   |
| Si        | -0.673555 | 10.702194 | 3.371247  |           |           | H        | 2.300243  | 2.972452  |   |
| 7.923711  |           |           | C         | -2.434975 | -0.582633 | -        | 3.880035  |           |   |
| Si        | 2.446730  | 11.877260 | 1.703272  |           |           | C        | 3.247638  | 0.051307  |   |
| 9.565888  |           |           | C         | -2.956660 | -1.176245 | -        | 2.817481  |           |   |
| Si        | 2.587325  | 11.104573 | 0.392195  |           |           | H        | 3.887120  | -0.147812 |   |
| 5.818348  |           |           | H         | -2.430239 | -2.100422 | -        | 3.692626  |           |   |
| C         | -1.196746 | 14.768215 | 0.120713  |           |           | H        | 3.739285  | 0.823474  |   |
| 9.146508  |           |           | H         | -4.026568 | -1.406826 | -        | 2.210547  |           |   |
| H         | -1.666861 | 13.902492 | 0.478109  |           |           | H        | 3.193506  | -0.877068 |   |
| 8.684895  |           |           | H         | -2.832364 | -0.458600 |          | 2.232780  |           |   |
| Si        | -1.874739 | 16.522990 | 0.427912  |           |           | C        | -2.794373 | -0.701492 |   |
| 8.877519  |           |           | C         | -3.196872 | 0.714704  | -        | 3.212308  |           |   |
| C         | -1.411994 | 17.290073 | 2.019626  |           |           | H        | -2.000021 | -1.462265 |   |
| 7.210438  |           |           | H         | -3.010514 | 1.475202  | -        | 3.299731  |           |   |
| H         | -0.324003 | 17.354965 | 1.249436  |           |           | H        | -3.496967 | -1.053100 |   |
| 7.072797  |           |           | H         | -4.276518 | 0.510276  | -        | 2.444088  |           |   |
| H         | -1.823197 | 16.698153 | 2.048348  |           |           | H        | -3.341700 | -0.669872 |   |
| 6.381263  |           |           | H         | -2.905073 | 1.125683  | -        | 4.168356  |           |   |
| H         | -1.829373 | 18.308429 | 2.994063  |           |           | C        | -1.963067 | 1.948669  |   |
| 7.145031  |           |           | C         | -2.620355 | -1.596025 | -        | 4.492484  |           |   |
| C         | -1.182407 | 17.646061 | 2.843553  |           |           | H        | -2.954349 | 2.002760  |   |
| 10.222791 |           |           | H         | -2.336902 | -1.174299 | -        | 4.971013  |           |   |
| H         | -1.415597 | 17.249535 | 3.815629  |           |           | H        | -1.584942 | 2.972443  |   |
| 11.219561 |           |           | H         | -3.678586 | -1.887165 | -        | 4.376573  |           |   |
|           |           |           | 2.896810  |           |           |          |           |           |   |

|          |           |           |          |           |           |   |           |           |           |
|----------|-----------|-----------|----------|-----------|-----------|---|-----------|-----------|-----------|
| H        | -1.294310 | 1.406269  | H        | -1.855169 | -4.029161 | - | H         | -0.173261 | 18.739747 |
| 5.173891 |           |           | 1.046822 |           |           |   | 7.057862  |           |           |
| C        | -3.494265 | 1.999718  | H        | -1.068102 | -5.568873 | - | C         | -1.323434 | 13.948176 |
| 1.871530 |           |           | 0.653617 |           |           |   | 4.710861  |           |           |
| H        | -3.734345 | 1.537790  | C        | 1.802996  | -4.883752 |   | C         | -0.505014 | 13.696672 |
| 0.904651 |           |           | 0.432388 |           |           |   | 3.434774  |           |           |
| H        | -3.196299 | 3.041337  | H        | 2.833726  | -4.500767 |   | H         | -0.318339 | 14.622011 |
| 1.687679 |           |           | 0.382954 |           |           |   | 2.876546  |           |           |
| H        | -4.420857 | 2.014692  | H        | 1.495522  | -4.937126 |   | H         | -1.064248 | 13.015661 |
| 2.468127 |           |           | 1.488485 |           |           |   | 2.778266  |           |           |
| C        | -0.477461 | 4.595246  | H        | 1.792811  | -5.899837 |   | H         | 0.458941  | 13.226555 |
| 2.310651 |           |           | 0.009670 |           |           |   | 3.668705  |           |           |
| H        | 0.022502  | 4.490165  | Cl       | -0.672966 | -3.664921 |   | C         | -2.641202 | 14.656011 |
| 3.283890 |           |           | 3.122867 |           |           |   | 4.354443  |           |           |
| H        | -1.555918 | 4.452437  | H        | 0.160891  | -2.332811 |   | H         | -3.220422 | 14.893400 |
| 2.460641 |           |           | 1.418771 |           |           |   | 5.256714  |           |           |
| H        | -0.318262 | 5.627921  | (5) TS_2 |           |           |   | H         | -3.249673 | 13.991851 |
| 1.960514 |           |           | 98       |           |           |   | 3.724850  |           |           |
| C        | 2.061859  | 3.922670  |          |           |           |   | H         | -2.466368 | 15.582316 |
| 0.832930 |           |           | C        | 0.071072  | 15.926503 |   | 3.793283  |           |           |
| H        | 2.096510  | 4.997570  | 5.572276 |           |           |   | C         | -1.636901 | 12.613083 |
| 0.592451 |           |           | C        | 0.087703  | 16.788460 |   | 5.383502  |           |           |
| H        | 2.590428  | 3.385065  | 4.361039 |           |           |   | H         | -0.716926 | 12.098506 |
| 0.036869 |           |           | C        | -0.985316 | 17.649075 |   | 5.688574  |           |           |
| H        | 2.620349  | 3.772013  | 4.088243 |           |           |   | H         | -2.183105 | 11.957619 |
| 1.767801 |           |           | H        | -1.833591 | 17.696399 |   | 4.692631  |           |           |
| C        | -0.653053 | 3.692053  | 4.771482 |           |           |   | H         | -2.260336 | 12.753649 |
| 0.613889 |           |           | C        | -0.956416 | 18.467195 |   | 6.275845  |           |           |
| H        | -0.537530 | 4.737704  | 2.958894 |           |           |   | C         | 1.744448  | 9.535068  |
| 0.940052 |           |           | H        | -1.793705 | 19.137029 |   | 8.680856  |           |           |
| H        | -1.727460 | 3.479426  | 2.758001 |           |           |   | H         | 1.880458  | 8.890106  |
| 0.519547 |           |           | C        | 0.139432  | 18.430881 |   | 9.557460  |           |           |
| H        | -0.245654 | 3.044179  | 2.092883 |           |           |   | H         | 2.697460  | 10.009088 |
| 1.401337 |           |           | H        | 0.159443  | 19.070301 |   | 8.409664  |           |           |
| N        | 1.104199  | 0.184806  | 1.209094 |           |           |   | H         | 1.420352  | 8.889689  |
| 1.573916 |           |           | C        | 1.210413  | 17.575171 |   | 7.851904  |           |           |
| N        | -0.998137 | -0.298654 | 2.362125 |           |           |   | C         | -1.269728 | 10.656889 |
| 1.465828 |           |           | H        | 2.068374  | 17.538969 |   | 8.123595  |           |           |
| Si       | 0.195101  | -0.399593 | 1.689411 |           |           |   | H         | -1.885837 | 9.911499  |
| 0.060862 |           |           | C        | 1.188931  | 16.758193 |   | 8.642236  |           |           |
| Si       | -0.035997 | 1.145368  | 3.493065 |           |           |   | H         | -1.123328 | 10.332504 |
| 1.734655 |           |           | H        | 2.022113  | 16.084165 |   | 7.084173  |           |           |
| Si       | 1.551202  | 0.592957  | 3.693226 |           |           |   | H         | -1.789134 | 11.625681 |
| 3.457861 |           |           | C        | 1.509904  | 17.344000 |   | 8.117420  |           |           |
| Si       | -2.174800 | 1.039627  | 7.159067 |           |           |   | C         | 0.155385  | 11.430697 |
| 2.841737 |           |           | C        | 1.572757  | 17.292892 |   | 10.811315 |           |           |
| Si       | 0.248019  | 3.406562  | 8.689234 |           |           |   | H         | -0.596448 | 10.801438 |
| 1.027720 |           |           | H        | 0.579835  | 17.456002 |   | 11.305088 |           |           |
| C        | 0.690726  | -2.094609 | 9.132168 |           |           |   | H         | -0.161665 | 12.483347 |
| 0.458608 |           |           | H        | 2.246395  | 18.074654 |   | 10.827755 |           |           |
| H        | 1.746491  | -1.968646 | 9.063379 |           |           |   | H         | 1.091604  | 11.343562 |
| 0.767030 |           |           | H        | 1.958998  | 16.325235 |   | 11.379483 |           |           |
| Si       | 0.595787  | -3.758564 | 9.034614 |           |           |   | C         | 2.322886  | 14.349097 |
| 0.469825 |           |           | C        | 2.925844  | 17.230625 |   | 11.095065 |           |           |
| C        | 1.089714  | -3.627481 | 6.571806 |           |           |   | H         | 1.672767  | 13.655734 |
| 2.292484 |           |           | H        | 3.379440  | 16.264872 |   | 11.643555 |           |           |
| H        | 0.444259  | -2.920492 | 6.826314 |           |           |   | H         | 1.724919  | 15.231994 |
| 2.833358 |           |           | H        | 3.563933  | 18.030341 |   | 10.831527 |           |           |
| H        | 2.134329  | -3.314561 | 6.974203 |           |           |   | H         | 3.121562  | 14.680273 |
| 2.426214 |           |           | H        | 2.907614  | 17.328921 |   | 11.778174 |           |           |
| H        | 0.973937  | -4.612005 | 5.478962 |           |           |   | C         | 4.012644  | 11.955218 |
| 2.772004 |           |           | C        | 0.877112  | 18.681063 |   | 10.260557 |           |           |
| C        | -1.127708 | -4.505036 | 6.741490 |           |           |   | H         | 4.700471  | 12.264171 |
| 0.374717 |           |           | H        | 0.927832  | 18.848515 |   | 11.064286 |           |           |
| H        | -1.485575 | -4.438831 | 5.659865 |           |           |   | H         | 4.605823  | 11.460799 |
| 0.665481 |           |           | H        | 1.427610  | 19.495761 |   | 9.479342  |           |           |
|          |           |           | 7.232617 |           |           |   |           |           |           |



|           |           |           |           |           |           |           |           |           |
|-----------|-----------|-----------|-----------|-----------|-----------|-----------|-----------|-----------|
| H         | 3.315201  | 11.215647 | C         | -3.169622 | 16.156578 | H         | 10.382922 | 7.585344  |
| 10.674686 |           |           | 10.545003 |           |           | 10.441960 |           |           |
| C         | 4.487917  | 14.649142 | H         | -4.182082 | 16.583301 | C         | 13.263708 | 3.337215  |
| 8.951668  |           |           | 10.609445 |           |           | 8.349614  |           |           |
| H         | 4.135565  | 15.677596 | H         | -3.114720 | 15.309190 | C         | 13.888483 | 4.165549  |
| 8.801466  |           |           | 11.244871 |           |           | 7.214310  |           |           |
| H         | 4.917892  | 14.293934 | H         | -2.457380 | 16.923293 | H         | 13.239745 | 4.165677  |
| 8.004878  |           |           | 10.886410 |           |           | 6.328863  |           |           |
| H         | 5.299303  | 14.683995 | C         | -4.048903 | 14.319413 | H         | 14.857133 | 3.730654  |
| 9.696873  |           |           | 8.246788  |           |           | 6.929083  |           |           |
| C         | 4.549486  | 11.414055 | H         | -3.896547 | 13.979669 | H         | 14.062409 | 5.204831  |
| 6.519422  |           |           | 7.212626  |           |           | 7.522406  |           |           |
| H         | 4.444906  | 10.485755 | H         | -4.006198 | 13.433742 | C         | 14.195923 | 3.346190  |
| 7.097983  |           |           | 8.898677  |           |           | 9.572975  |           |           |
| H         | 5.158294  | 12.116741 | H         | -5.065361 | 14.736022 | H         | 14.428652 | 4.368809  |
| 7.104910  |           |           | 8.311862  |           |           | 9.895694  |           |           |
| H         | 5.104644  | 11.172432 | (6) 2     |           |           | H         | 15.143015 | 2.849234  |
| 5.598426  |           |           | 84        |           |           | 9.317453  |           |           |
| C         | 1.982395  | 10.837697 |           |           |           | H         | 13.743158 | 2.806941  |
| 4.993552  |           |           | C         | 11.503374 | 5.026917  | 10.416010 |           |           |
| H         | 2.612922  | 10.556609 | 9.175443  |           |           | C         | 13.065889 | 1.892269  |
| 4.134786  |           |           | C         | 12.344259 | 6.227584  | 7.871850  |           |           |
| H         | 1.016489  | 11.184750 | 9.432358  |           |           | H         | 12.664430 | 1.259970  |
| 4.602814  |           |           | C         | 12.482949 | 7.204581  | 8.676565  |           |           |
| H         | 1.795892  | 9.932374  | 8.435760  |           |           | H         | 14.025555 | 1.466427  |
| 5.588673  |           |           | H         | 11.988846 | 7.071451  | 7.550030  |           |           |
| C         | 3.233504  | 13.654168 | 7.472534  |           |           | H         | 12.366590 | 1.853071  |
| 4.940655  |           |           | C         | 13.251839 | 8.344609  | 7.025226  |           |           |
| H         | 3.767132  | 13.341087 | 8.673406  |           |           | C         | 10.344153 | -0.288918 |
| 4.029146  |           |           | H         | 13.354560 | 9.097395  | 6.428275  |           |           |
| H         | 3.859284  | 14.387349 | 7.890165  |           |           | H         | 10.779962 | -0.268312 |
| 5.468764  |           |           | C         | 13.884675 | 8.520824  | 7.438207  |           |           |
| H         | 2.306890  | 14.157249 | 9.906351  |           |           | H         | 11.104664 | 0.086518  |
| 4.633906  |           |           | H         | 14.483414 | 9.414000  | 5.728264  |           |           |
| N         | -0.552231 | 14.737892 | 10.091691 |           |           | H         | 10.134276 | -1.341005 |
| 5.709859  |           |           | C         | 13.745984 | 7.550995  | 6.173198  |           |           |
| N         | 0.693432  | 16.177352 | 10.902675 |           |           | C         | 7.501472  | -0.077075 |
| 6.737639  |           |           | H         | 14.234054 | 7.683221  | 7.510708  |           |           |
| Si        | 0.146889  | 14.534835 | 11.869542 |           |           | H         | 7.375672  | -1.143219 |
| 7.425151  |           |           | C         | 12.979838 | 6.408937  | 7.260238  |           |           |
| Si        | 1.567793  | 12.729829 | 10.668498 |           |           | H         | 6.519584  | 0.413305  |
| 7.945937  |           |           | H         | 12.860982 | 5.663087  | 7.436535  |           |           |
| Si        | 0.367284  | 10.782988 | 11.454916 |           |           | H         | 7.828138  | -0.011812 |
| 9.049077  |           |           | C         | 9.139315  | 5.940435  | 8.558609  |           |           |
| Si        | 3.126552  | 13.495360 | 9.669608  |           |           | C         | 8.057920  | 0.471004  |
| 9.603252  |           |           | C         | 7.920136  | 5.145210  | 4.569075  |           |           |
| Si        | 2.870130  | 12.147208 | 10.164416 |           |           | H         | 7.871244  | -0.601061 |
| 6.035031  |           |           | H         | 7.573789  | 4.447033  | 4.393955  |           |           |
| C         | -1.059212 | 14.803367 | 9.387292  |           |           | H         | 8.762021  | 0.820562  |
| 8.830479  |           |           | H         | 7.097377  | 5.834152  | 3.799729  |           |           |
| H         | -1.194846 | 13.806300 | 10.399215 |           |           | H         | 7.109733  | 1.010816  |
| 9.285255  |           |           | H         | 8.164894  | 4.575706  | 4.428193  |           |           |
| H         | -0.457853 | 15.360547 | 11.072777 |           |           | C         | 8.753218  | 4.203222  |
| 9.572571  |           |           | C         | 8.753652  | 6.730699  | 3.445763  |           |           |
| Cl        | -0.677376 | 8.315159  | 8.406891  |           |           | H         | 7.953482  | 4.890196  |
| 10.304610 |           |           | H         | 9.607800  | 7.312657  | 3.759944  |           |           |
| Si        | -2.781397 | 15.603812 | 8.034238  |           |           | H         | 8.281716  | 3.254029  |
| 8.786077  |           |           | H         | 7.935233  | 7.428716  | 3.151439  |           |           |
| C         | -2.837075 | 17.103323 | 8.634445  |           |           | H         | 9.247107  | 4.629385  |
| 7.644619  |           |           | H         | 8.420427  | 6.042224  | 2.557374  |           |           |
| H         | -2.629375 | 16.818333 | 7.616576  |           |           | C         | 10.748597 | 5.655682  |
| 6.604405  |           |           | C         | 9.595375  | 6.900540  | 5.228054  |           |           |
| H         | -3.834774 | 17.566672 | 10.778577 |           |           | H         | 11.519548 | 5.583211  |
| 7.673423  |           |           | H         | 9.962634  | 6.350385  | 6.007462  |           |           |
| H         | -2.103886 | 17.864810 | 11.656389 |           |           | H         | 9.975654  | 6.356409  |
| 7.947315  |           |           | H         | 8.734242  | 7.507685  | 5.574170  |           |           |
|           |           |           | 11.090888 |           |           |           |           |           |

|                  |           |           |                  |           |           |           |          |           |           |
|------------------|-----------|-----------|------------------|-----------|-----------|-----------|----------|-----------|-----------|
| H                | 11.218642 | 6.078594  | C                | -1.679187 | -1.549656 | -         | H        | 4.530117  | 15.922402 |
| 4.325716         |           |           | 0.980732         |           |           |           | 7.906770 |           |           |
| C                | 11.402889 | 2.878007  | H                | -2.675160 | -1.563813 | -         | H        | 2.835799  | 16.256952 |
| 4.124315         |           |           | 1.445648         |           |           |           | 8.335444 |           |           |
| H                | 11.849258 | 3.377437  | H                | -1.137082 | -2.452310 | -         | C        | -1.606510 | 15.828582 |
| 3.248344         |           |           | 1.296721         |           |           |           | 5.416179 |           |           |
| H                | 11.017950 | 1.901430  | H                | -1.808417 | -1.589996 |           | C        | -1.442937 | 16.307505 |
| 3.795682         |           |           | 0.112143         |           |           |           | 3.963898 |           |           |
| H                | 12.203329 | 2.689565  | C                | 0.998766  | 0.000511  | -         | H        | -0.771212 | 17.171170 |
| 4.853536         |           |           | 0.761582         |           |           |           | 3.884744 |           |           |
| C                | 9.742656  | 1.946194  | H                | 0.964145  | -0.000128 |           | H        | -2.424735 | 16.607852 |
| 9.873263         |           |           | 0.339136         |           |           |           | 3.571392 |           |           |
| H                | 9.881875  | 0.971320  | H                | 1.553700  | -0.890400 | -         | H        | -1.050100 | 15.502404 |
| 9.372810         |           |           | 1.088526         |           |           |           | 3.326862 |           |           |
| C                | 9.080469  | 1.091695  | H                | 1.552981  | 0.892252  | -         | C        | -2.048451 | 16.997104 |
| 12.721267        |           |           | 1.087492         |           |           |           | 6.315304 |           |           |
| H                | 9.441720  | 0.909469  | Cl               | -0.568393 | 0.000460  | -         | H        | -2.161876 | 16.654582 |
| 13.744817        |           |           | 3.556553         |           |           |           | 7.352320 |           |           |
| H                | 8.682570  | 0.144438  | (8) <b>TS_1'</b> |           |           |           | H        | -3.021290 | 17.376170 |
| 12.327222        |           |           | 98               |           |           |           | 5.970220 |           |           |
| H                | 8.245788  | 1.807174  |                  |           |           |           | H        | -1.333163 | 17.828675 |
| 12.779674        |           |           | C                | 0.912665  | 15.665882 |           | 6.282229 |           |           |
| C                | 11.868458 | 0.497765  | 5.859985         |           |           |           | C        | -2.678968 | 14.739891 |
| 11.586020        |           |           | C                | 1.377591  | 16.980173 |           | 5.479855 |           |           |
| H                | 12.716550 | 0.836630  | 5.345609         |           |           |           | H        | -2.388432 | 13.867310 |
| 10.974047        |           |           | C                | 1.228430  | 18.146153 |           | 4.882473 |           |           |
| H                | 11.522926 | -0.464101 | 6.112840         |           |           |           | H        | -3.632339 | 15.124168 |
| 11.177430        |           |           | H                | 0.781068  | 18.082943 |           | 5.092257 |           |           |
| H                | 12.243942 | 0.315774  | 7.105582         |           |           |           | H        | -2.831442 | 14.420970 |
| 12.604631        |           |           | C                | 1.675370  | 19.373635 |           | 6.519013 |           |           |
| C                | 11.097758 | 3.364350  | 5.623499         |           |           |           | C        | -1.965811 | 9.946894  |
| 12.366536        |           |           | H                | 1.559716  | 20.271977 |           | 8.221614 |           |           |
| H                | 10.323293 | 4.143909  | 6.232008         |           |           |           | H        | -1.751746 | 10.779981 |
| 12.379670        |           |           | C                | 2.273477  | 19.451188 |           | 8.907227 |           |           |
| H                | 11.958336 | 3.745520  | 4.362482         |           |           |           | H        | -1.159866 | 9.205197  |
| 11.801080        |           |           | H                | 2.621423  | 20.412320 |           | 8.310775 |           |           |
| H                | 11.423532 | 3.190755  | 3.980446         |           |           |           | H        | -2.904617 | 9.470805  |
| 13.403308        |           |           | C                | 2.425770  | 18.294722 |           | 8.546966 |           |           |
| N                | 10.171853 | 4.936329  | 3.593339         |           |           |           | C        | -2.498753 | 9.148269  |
| 9.327911         |           |           | H                | 2.888830  | 18.348257 |           | 5.272095 |           |           |
| N                | 11.916658 | 3.834583  | 2.606751         |           |           |           | H        | -3.392562 | 8.603566  |
| 8.702704         |           |           | C                | 1.982153  | 17.064949 |           | 5.617769 |           |           |
| Si               | 10.141090 | 3.236436  | 4.082275         |           |           |           | H        | -1.666822 | 8.435025  |
| 8.555183         |           |           | H                | 2.088317  | 16.165037 |           | 5.213248 |           |           |
| Si               | 8.815484  | 3.077474  | 3.474535         |           |           |           | H        | -2.704722 | 9.514324  |
| 6.698392         |           |           | C                | 3.107630  | 14.729887 |           | 4.255282 |           |           |
| Si               | 8.744680  | 0.740082  | 6.792302         |           |           |           | C        | -3.728546 | 11.652676 |
| 6.323742         |           |           | C                | 3.320558  | 13.564011 |           | 6.429314 |           |           |
| Si               | 10.004018 | 3.945206  | 7.762962         |           |           |           | H        | -4.576916 | 10.999639 |
| 4.854662         |           |           | H                | 2.748961  | 13.714670 |           | 6.691937 |           |           |
| Si               | 10.460134 | 1.755783  | 8.689301         |           |           |           | H        | -3.929619 | 12.087841 |
| 11.615911        |           |           | H                | 4.383716  | 13.470104 |           | 5.440939 |           |           |
| H                | 8.646892  | 2.040980  | 8.022087         |           |           |           | H        | -3.677467 | 12.462995 |
| 9.981054         |           |           | H                | 2.995187  | 12.621296 |           | 7.169212 |           |           |
| (7) <b>TMSCI</b> |           |           | 7.307837         |           |           |           | C        | 1.931007  | 10.089743 |
| 14               |           |           | C                | 3.979444  | 14.519955 |           | 8.241879 |           |           |
|                  |           |           | 5.542339         |           |           |           | H        | 1.014626  | 9.922473  |
| Si               | -0.740857 | 0.000069  | -                | H         | 3.682359  | 13.605655 | 8.824389 |           |           |
| 1.456349         |           |           |                  | 5.011177  |           |           | H        | 2.391026  | 11.015825 |
| C                | -1.680015 | 1.549046  | -                | H         | 5.036999  | 14.429861 | 8.607895 |           |           |
| 0.979924         |           |           |                  | 5.829728  |           |           | H        | 2.626003  | 9.260833  |
| H                | -2.679264 | 1.559073  | -                | H         | 3.886020  | 15.366216 | 8.452501 |           |           |
| 1.437869         |           |           |                  | 4.849779  |           |           | C        | 1.040213  | 8.352269  |
| H                | -1.801639 | 1.593000  |                  | C         | 3.514714  | 16.034670 | 5.933774 |           |           |
| 0.113690         |           |           |                  | 7.499876  |           |           | H        | 1.888337  | 7.677126  |
| H                | -1.142397 | 2.451894  | -                | H         | 3.519954  | 16.893489 | 6.133273 |           |           |
| 1.302932         |           |           |                  | 6.818578  |           |           |          |           |           |

|           |           |           |            |           |           |          |           |           |   |
|-----------|-----------|-----------|------------|-----------|-----------|----------|-----------|-----------|---|
| H         | 0.767643  | 8.251100  | H          | 2.665248  | 15.193911 | H        | -0.776193 | -3.512453 | - |
| 4.874626  |           |           | 10.565434  |           |           | 3.704480 |           |           |   |
| H         | 0.191083  | 8.012087  | C          | 0.483680  | 12.749864 | H        | 0.561055  | -2.342939 | - |
| 6.542796  |           |           | 10.794684  |           |           | 3.684191 |           |           |   |
| C         | 3.185606  | 10.431371 | H          | 0.842442  | 12.337725 | C        | 0.581174  | 2.638698  | - |
| 5.442285  |           |           | 11.750082  |           |           | 1.469945 |           |           |   |
| H         | 3.615602  | 11.422514 | H          | -0.470503 | 12.271437 | C        | -0.314978 | 3.240007  | - |
| 5.637690  |           |           | 10.534312  |           |           | 2.568699 |           |           |   |
| H         | 3.038868  | 10.339463 | H          | 1.210915  | 12.494702 | H        | -0.017970 | 2.956290  | - |
| 4.356523  |           |           | 10.012534  |           |           | 3.583178 |           |           |   |
| H         | 3.929742  | 9.677638  | C          | -0.987097 | 15.012910 | H        | -0.223396 | 4.332627  | - |
| 5.746217  |           |           | 12.296163  |           |           | 2.488854 |           |           |   |
| C         | 0.354790  | 10.146664 | H          | -1.104771 | 16.100338 | H        | -1.373635 | 2.986089  | - |
| 2.609551  |           |           | 12.417172  |           |           | 2.427122 |           |           |   |
| H         | -0.403159 | 9.390994  | H          | -1.971739 | 14.583617 | C        | 2.040341  | 2.988151  | - |
| 2.860601  |           |           | 12.064222  |           |           | 1.811013 |           |           |   |
| H         | 1.333626  | 9.767964  | H          | -0.641550 | 14.600552 | H        | 2.730258  | 2.604190  | - |
| 2.933638  |           |           | 13.256402  |           |           | 1.051428 |           |           |   |
| H         | 0.378314  | 10.252378 | (9) Int_1' |           |           | H        | 2.158965  | 4.079901  | - |
| 1.512627  |           |           | 98         |           |           | 1.871702 |           |           |   |
| C         | -1.714450 | 12.355420 |            |           |           | H        | 2.312503  | 2.563007  | - |
| 2.616296  |           |           | C          | -0.203950 | 0.254385  | -        | 2.788311  |           |   |
| H         | -1.642668 | 12.255599 | 2.093672   |           |           | C        | 0.128999  | 3.317417  | - |
| 1.521118  |           |           | C          | -0.684236 | 0.535647  | -        | 0.163859  |           |   |
| H         | -1.971943 | 13.398243 | 3.479544   |           |           | H        | -0.944634 | 3.145344  | - |
| 2.841408  |           |           | C          | 0.244936  | 0.595045  | -        | 0.010020  |           |   |
| H         | -2.543930 | 11.719802 | 4.528329   |           |           | H        | 0.290411  | 4.402287  | - |
| 2.958263  |           |           | H          | 1.306063  | 0.463616  | -        | 0.241445  |           |   |
| C         | 1.263270  | 13.075424 | 4.316380   |           |           | H        | 0.675080  | 2.952474  |   |
| 2.872893  |           |           | C          | -0.183307 | 0.807802  | -        | 0.708968  |           |   |
| H         | 1.287048  | 13.189605 | 5.838379   |           |           | C        | 1.707153  | 0.125797  |   |
| 1.777659  |           |           | H          | 0.549306  | 0.843423  | -        | 4.561092  |           |   |
| H         | 2.260615  | 12.757069 | 6.646414   |           |           | H        | 2.503145  | 0.112583  |   |
| 3.207982  |           |           | C          | -1.543036 | 0.977035  | -        | 3.803855  |           |   |
| H         | 1.057264  | 14.058614 | 6.114313   |           |           | H        | 1.482247  | -0.911523 |   |
| 3.319533  |           |           | H          | -1.877938 | 1.146359  | -        | 4.848871  |           |   |
| N         | -0.355080 | 15.209960 | 7.138949   |           |           | H        | 2.083801  | 0.650667  |   |
| 5.913848  |           |           | C          | -2.471134 | 0.933293  | -        | 5.453471  |           |   |
| N         | 1.677366  | 14.695054 | 5.070716   |           |           | C        | -1.138665 | 1.000420  |   |
| 6.416082  |           |           | H          | -3.533655 | 1.076043  | -        | 5.277854  |           |   |
| Si        | 0.146427  | 13.756508 | 5.274974   |           |           | H        | -0.787457 | 1.672826  |   |
| 7.000716  |           |           | C          | -2.045183 | 0.709942  | -        | 6.077519  |           |   |
| Si        | -0.143493 | 11.680887 | 3.760710   |           |           | H        | -1.292186 | 0.007873  |   |
| 5.764950  |           |           | H          | -2.772583 | 0.695645  | -        | 5.716906  |           |   |
| Si        | -2.162927 | 10.596228 | 2.949151   |           |           | H        | -2.115148 | 1.373332  |   |
| 6.454567  |           |           | C          | -0.840126 | -2.182023 | -        | 4.938988  |           |   |
| Si        | 1.564429  | 10.119818 | 2.007372   |           |           | C        | 0.581979  | 2.846439  |   |
| 6.382079  |           |           | C          | -0.249983 | -3.348558 | -        | 3.659947  |           |   |
| Si        | -0.064610 | 11.826445 | 1.199464   |           |           | H        | 0.841829  | 3.259385  |   |
| 3.388011  |           |           | H          | 0.795786  | -3.538334 | -        | 4.648544  |           |   |
| Cl        | -2.384543 | 14.101088 | 1.476536   |           |           | H        | -0.275876 | 3.413360  |   |
| 9.117796  |           |           | H          | -0.819367 | -4.264384 | -        | 3.274364  |           |   |
| C         | -0.377284 | 15.391344 | 1.410748   |           |           | H        | 1.432340  | 2.994883  |   |
| 9.326802  |           |           | H          | -0.300668 | -3.156969 | -        | 2.984868  |           |   |
| H         | 0.339730  | 15.666634 | 0.122584   |           |           | C        | 0.629654  | -3.338989 |   |
| 8.548566  |           |           | C          | -2.368299 | -2.187394 | -        | 2.671566  |           |   |
| H         | -1.128924 | 16.175483 | 1.815358   |           |           | H        | 1.432429  | -2.787292 |   |
| 9.444097  |           |           | H          | -2.627689 | -1.992973 | -        | 3.181969  |           |   |
| Si        | 0.237108  | 14.607763 | 0.767070   |           |           | H        | 0.970765  | -3.550404 |   |
| 10.925093 |           |           | H          | -2.781075 | -3.166864 | -        | 1.650254  |           |   |
| C         | 1.899738  | 15.435360 | 2.098822   |           |           | H        | 0.492745  | -4.300701 |   |
| 11.317325 |           |           | H          | -2.847838 | -1.425198 | -        | 3.191716  |           |   |
| H         | 1.803931  | 16.530378 | 2.441188   |           |           | C        | -1.527253 | -2.404601 |   |
| 11.365315 |           |           | C          | -0.512909 | -2.466825 | -        | 4.557988  |           |   |
| H         | 2.268261  | 15.085351 | 3.487531   |           |           | H        | -1.735203 | -3.453771 |   |
| 12.294376 |           |           | H          | -1.071321 | -1.832494 | -        | 4.824934  |           |   |
|           |           |           | 4.183549   |           |           |          |           |           |   |

|          |           |           |            |           |           |   |           |           |           |
|----------|-----------|-----------|------------|-----------|-----------|---|-----------|-----------|-----------|
| H        | -2.439925 | -1.822443 | H          | 4.531065  | -3.551108 | - | H         | 2.508076  | 19.027504 |
| 4.745141 |           |           | 0.260101   |           |           |   | 6.304209  |           |           |
| H        | -0.737179 | -2.039315 | C          | 5.104899  | -0.298945 | - | H         | 0.783391  | 18.595378 |
| 5.227334 |           |           | 0.406980   |           |           |   | 6.309259  |           |           |
| C        | -2.350038 | -3.385315 | H          | 6.016890  | -0.422071 | - | C         | -1.458150 | 13.800992 |
| 1.865672 |           |           | 1.011930   |           |           |   | 4.810432  |           |           |
| H        | -2.219728 | -3.488405 | H          | 4.835847  | 0.765641  | - | C         | -1.601082 | 14.245688 |
| 0.783408 |           |           | 0.388586   |           |           |   | 3.349053  |           |           |
| H        | -3.342601 | -2.950077 | H          | 5.334679  | -0.600370 |   | H         | -1.992715 | 15.264620 |
| 2.048869 |           |           | 0.625752   |           |           |   | 3.249543  |           |           |
| H        | -2.345503 | -4.397118 | C          | 3.324311  | -0.723901 | - | H         | -2.317582 | 13.562914 |
| 2.302927 |           |           | 2.861392   |           |           |   | 2.871459  |           |           |
| C        | -4.172018 | -0.023542 | H          | 2.528031  | -1.318047 | - | H         | -0.654835 | 14.176686 |
| 2.532760 |           |           | 3.332489   |           |           |   | 2.797829  |           |           |
| H        | -3.918947 | -0.153788 | H          | 3.003609  | 0.326523  | - | C         | -2.816659 | 13.955123 |
| 3.594762 |           |           | 2.830206   |           |           |   | 5.510225  |           |           |
| H        | -4.342856 | -1.018566 | H          | 4.218438  | -0.789470 | - | H         | -2.757142 | 13.614471 |
| 2.098933 |           |           | 3.499645   |           |           |   | 6.550607  |           |           |
| H        | -5.118628 | 0.537766  | (10) TS_2' |           |           |   | H         | -3.571629 | 13.343998 |
| 2.476881 |           |           | 98         |           |           |   | 4.995386  |           |           |
| C        | -2.875254 | 2.704315  |            |           |           |   | H         | -3.150555 | 15.002170 |
| 2.268067 |           |           | C          | 0.326134  | 15.627441 |   | 5.489517  |           |           |
| H        | -3.879681 | 3.113242  | 5.262663   |           |           |   | C         | -1.024062 | 12.328992 |
| 2.069901 |           |           | C          | 0.329291  | 16.394722 |   | 4.813101  |           |           |
| H        | -2.142282 | 3.360517  | 3.989579   |           |           |   | H         | -0.096551 | 12.203916 |
| 1.780636 |           |           | C          | -0.622776 | 17.400864 |   | 4.240091  |           |           |
| H        | -2.703167 | 2.752570  | 3.775648   |           |           |   | H         | -1.804137 | 11.712924 |
| 3.351673 |           |           | H          | -1.374048 | 17.606673 |   | 4.343511  |           |           |
| C        | -3.342160 | 1.048371  | 4.538953   |           |           |   | H         | -0.873183 | 11.959382 |
| 0.212981 |           |           | C          | -0.598889 | 18.145991 |   | 5.835044  |           |           |
| H        | -4.289800 | 1.605764  | 2.597335   |           |           |   | C         | 0.204936  | 11.340249 |
| 0.279511 |           |           | H          | -1.340855 | 18.930241 |   | 10.910483 |           |           |
| H        | -3.489588 | 0.060539  | 2.439862   |           |           |   | H         | -0.272813 | 12.326091 |
| 0.665903 |           |           | C          | 0.370493  | 17.888809 |   | 10.988042 |           |           |
| H        | -2.587612 | 1.588144  | 1.623335   |           |           |   | H         | 1.267710  | 11.451355 |
| 0.801024 |           |           | H          | 0.386656  | 18.471375 |   | 11.161386 |           |           |
| N        | 0.459138  | 1.148074  | 0.700875   |           |           |   | H         | -0.259695 | 10.677624 |
| 1.304389 |           |           | C          | 1.317780  | 16.883253 |   | 11.657835 |           |           |
| N        | -0.279508 | -0.908478 | 1.832886   |           |           |   | C         | 1.397733  | 9.387210  |
| 1.476448 |           |           | H          | 2.073473  | 16.673778 |   | 8.751112  |           |           |
| Si       | 0.868620  | -0.031460 | 1.074299   |           |           |   | H         | 1.425242  | 8.605430  |
| 0.089056 |           |           | C          | 1.301673  | 16.138828 |   | 9.530501  |           |           |
| Si       | -0.689811 | -0.115115 | 3.013843   |           |           |   | H         | 2.387309  | 9.854910  |
| 1.946998 |           |           | H          | 2.034781  | 15.346993 |   | 8.679783  |           |           |
| Si       | 0.170601  | 1.011086  | 3.172720   |           |           |   | H         | 1.183588  | 8.886606  |
| 3.893714 |           |           | C          | 2.168980  | 16.911608 |   | 7.795195  |           |           |
| Si       | -1.000749 | -2.369662 | 6.514464   |           |           |   | C         | -1.363046 | 9.216174  |
| 2.735245 |           |           | C          | 2.356915  | 17.057106 |   | 9.390193  |           |           |
| Si       | -2.820178 | 0.927276  | 8.030333   |           |           |   | H         | -0.948860 | 8.392473  |
| 1.602755 |           |           | H          | 1.458296  | 17.479606 |   | 9.995326  |           |           |
| Cl       | 2.392520  | 1.299909  | 8.500774   |           |           |   | H         | -1.652494 | 8.801031  |
| 1.130996 |           |           | H          | 3.201615  | 17.727098 |   | 8.412480  |           |           |
| C        | 2.183400  | -1.387466 | 8.239104   |           |           |   | H         | -2.274176 | 9.593121  |
| 0.000519 |           |           | H          | 2.574595  | 16.087020 |   | 9.873329  |           |           |
| H        | 2.590309  | -1.438963 | 8.494996   |           |           |   | C         | 2.694800  | 14.190568 |
| 1.023434 |           |           | C          | 3.486758  | 16.447640 |   | 10.748440 |           |           |
| H        | 1.692353  | -2.346177 | 5.871145   |           |           |   | H         | 1.847271  | 13.709752 |
| 0.196101 |           |           | H          | 3.778628  | 15.461764 |   | 11.254602 |           |           |
| Si       | 3.711742  | -1.345212 | 6.253258   |           |           |   | H         | 2.376874  | 15.198918 |
| 1.122896 |           |           | H          | 4.291044  | 17.161361 |   | 10.449001 |           |           |
| C        | 4.309415  | -3.136178 | 6.101212   |           |           |   | H         | 3.511052  | 14.306073 |
| 1.255167 |           |           | H          | 3.388206  | 16.385650 |   | 11.480306 |           |           |
| H        | 3.546066  | -3.777214 | 4.779539   |           |           |   | C         | 4.094583  | 11.583976 |
| 1.723095 |           |           | C          | 1.775343  | 18.287791 |   | 10.045787 |           |           |
| H        | 5.224961  | -3.203790 | 5.951459   |           |           |   | H         | 4.876640  | 11.890286 |
| 1.862480 |           |           | H          | 1.776270  | 18.312338 |   | 10.759386 |           |           |
|          |           |           | 4.856289   |           |           |   |           |           |           |

|           |           |           |                         |           |           |                          |           |           |   |
|-----------|-----------|-----------|-------------------------|-----------|-----------|--------------------------|-----------|-----------|---|
| H         | 4.567118  | 10.954113 | H                       | -1.566980 | 16.747756 | H                        | -1.147548 | 5.853994  | - |
| 9.279115  |           |           | 11.280208               |           |           | 0.696341                 |           |           |   |
| H         | 3.363748  | 10.968193 | C                       | -3.543879 | 15.332763 | C                        | -1.806172 | -0.585519 | - |
| 10.586392 |           |           | 9.060849                |           |           | 1.185018                 |           |           |   |
| C         | 4.799389  | 14.096093 | H                       | -4.383278 | 16.019140 | C                        | -1.597686 | -0.894601 | - |
| 8.547797  |           |           | 9.250830                |           |           | 2.536762                 |           |           |   |
| H         | 4.570731  | 15.152736 | H                       | -3.787022 | 14.732712 | C                        | -3.049330 | -0.855327 | - |
| 8.359666  |           |           | 8.173972                |           |           | 0.593965                 |           |           |   |
| H         | 5.149912  | 13.653780 | H                       | -3.465815 | 14.642290 | C                        | -2.627262 | -1.456700 | - |
| 7.605412  |           |           | 9.913704                |           |           | 3.292041                 |           |           |   |
| H         | 5.633712  | 14.060819 | C                       | -2.091150 | 17.441740 | C                        | -4.075403 | -1.423430 | - |
| 9.267669  |           |           | 7.349899                |           |           | 1.353166                 |           |           |   |
| C         | 4.423905  | 10.925719 | H                       | -1.174471 | 18.027662 | C                        | -3.867126 | -1.721264 | - |
| 6.270939  |           |           | 7.191591                |           |           | 2.701923                 |           |           |   |
| H         | 4.384970  | 10.136549 | H                       | -2.295184 | 16.864306 | H                        | -0.619005 | -0.706151 | - |
| 7.036187  |           |           | 6.437777                |           |           | 2.983320                 |           |           |   |
| H         | 5.108968  | 11.708983 | H                       | -2.922283 | 18.148415 | H                        | -3.216854 | -0.631507 |   |
| 6.622308  |           |           | 7.494885                |           |           | 0.460937                 |           |           |   |
| H         | 4.854091  | 10.482281 | (11) Ph <sub>3</sub> PS |           |           | H                        | -2.458255 | -1.695600 | - |
| 5.358124  |           |           | 35                      |           |           | 4.343518                 |           |           |   |
| C         | 1.771384  | 10.076866 |                         |           |           | H                        | -5.038166 | -1.637847 | - |
| 5.147413  |           |           | P                       | -0.438513 | 0.192764  | -                        | 0.885837  |           |   |
| H         | 2.104817  | 9.906505  | 0.246323                |           |           | H                        | -4.669149 | -2.167594 | - |
| 4.110894  |           |           | S                       | 1.346471  | -0.406547 | -                        | 3.292590  |           |   |
| H         | 0.680162  | 10.188637 | 0.807384                |           |           | (12) Ph <sub>3</sub> PSe |           |           |   |
| 5.143420  |           |           | C                       | -0.814850 | -0.162353 | 35                       |           |           |   |
| H         | 2.013812  | 9.176052  | 1.511401                |           |           | P                        | -0.435388 | 0.191939  | - |
| 5.728952  |           |           | C                       | -0.356862 | -1.370208 | 0.247748                 |           |           |   |
| C         | 2.885661  | 12.853034 | 2.058475                |           |           | C                        | -0.808003 | -0.164797 |   |
| 4.476595  |           |           | C                       | -1.557603 | 0.722859  | 1.510431                 |           |           |   |
| H         | 3.372748  | 12.385590 | 2.306085                |           |           | C                        | -0.352833 | -1.372957 |   |
| 3.605657  |           |           | C                       | -0.649356 | -1.692560 | 2.058518                 |           |           |   |
| H         | 3.501038  | 13.703976 | 3.383745                |           |           | C                        | -1.551726 | 0.722372  |   |
| 4.799829  |           |           | C                       | -1.843145 | 0.397885  | 2.302480                 |           |           |   |
| H         | 1.910353  | 13.241517 | 3.635080                |           |           | C                        | -0.648278 | -1.694257 |   |
| 4.151290  |           |           | C                       | -1.392790 | -0.809509 | 3.383092                 |           |           |   |
| N         | -0.449049 | 14.574817 | 4.173798                |           |           | C                        | -1.840225 | 0.397806  |   |
| 5.590882  |           |           | H                       | 0.242726  | -2.043912 | 3.630963                 |           |           |   |
| N         | 1.123424  | 15.878260 | 1.442678                |           |           | C                        | -1.391922 | -0.809638 |   |
| 6.316001  |           |           | H                       | -1.907049 | 1.670642  | 4.171274                 |           |           |   |
| Si        | 0.419008  | 14.417012 | 1.893403                |           |           | H                        | 0.247462  | -2.047709 |   |
| 7.248350  |           |           | H                       | -0.289013 | -2.633251 | 1.444387                 |           |           |   |
| Si        | 1.568132  | 12.443937 | 3.803695                |           |           | H                        | -1.901443 | 1.669475  |   |
| 7.807828  |           |           | H                       | -2.414772 | 1.094660  | 1.888531                 |           |           |   |
| Si        | -0.037571 | 10.592256 | 4.250731                |           |           | H                        | -0.290149 | -2.635555 |   |
| 9.185532  |           |           | H                       | -1.614037 | -1.060271 | 3.803683                 |           |           |   |
| Si        | 3.320428  | 13.146567 | 5.212792                |           |           | H                        | -2.414169 | 1.094924  |   |
| 9.285814  |           |           | C                       | -0.698850 | 1.997533  | -                        | 4.244305  |           |   |
| Si        | 2.684394  | 11.580112 | 0.428012                |           |           | H                        | -1.614478 | -1.058465 |   |
| 5.874999  |           |           | C                       | 0.374164  | 2.853971  | -                        | 5.210309  |           |   |
| Cl        | -1.743404 | 11.894711 | 0.139019                |           |           | C                        | -0.692602 | 1.996902  | - |
| 8.287060  |           |           | C                       | -1.932136 | 2.537282  | -                        | 0.430125  |           |   |
| C         | -0.473494 | 15.106884 | 0.820914                |           |           | C                        | 0.378573  | 2.854764  | - |
| 8.746170  |           |           | C                       | 0.209315  | 4.236074  | -                        | 0.139608  |           |   |
| H         | -0.759930 | 14.214947 | 0.229962                |           |           | C                        | -1.927445 | 2.533656  | - |
| 9.327748  |           |           | C                       | -2.089934 | 3.922500  | -                        | 0.822959  |           |   |
| H         | 0.349723  | 15.576169 | 0.917827                |           |           | C                        | 0.211118  | 4.236294  | - |
| 9.313437  |           |           | C                       | -1.022571 | 4.772389  | -                        | 0.229338  |           |   |
| Si        | -1.943380 | 16.301547 | 0.619108                |           |           | C                        | -2.087517 | 3.918760  | - |
| 8.846974  |           |           | H                       | 1.339675  | 2.427392  |                          | 0.918157  |           |   |
| C         | -1.670529 | 17.372352 | 0.140575                |           |           | C                        | -1.021716 | 4.770377  | - |
| 10.379936 |           |           | H                       | -2.769031 | 1.879279  | -                        | 0.618731  |           |   |
| H         | -0.755905 | 17.977871 | 1.059443                |           |           | H                        | 1.344991  | 2.429715  |   |
| 10.284884 |           |           | H                       | 1.047856  | 4.896848  | -                        | 0.139660  |           |   |
| H         | -2.515521 | 18.059369 | 0.003372                |           |           | H                        | -2.763747 | 1.874624  | - |
| 10.540000 |           |           | H                       | -3.049971 | 4.336058  | -                        | 1.060579  |           |   |
|           |           |           | 1.231673                |           |           |                          |           |           |   |

|                                        |           |           |   |                       |           |           |   |           |           |           |
|----------------------------------------|-----------|-----------|---|-----------------------|-----------|-----------|---|-----------|-----------|-----------|
| H                                      | 1.048488  | 4.898226  | - | C                     | -1.039337 | 4.758025  | - | H         | 7.833938  | 2.039817  |
| 0.001499                               |           |           |   | 0.639711              |           |           |   | 6.898748  |           |           |
| H                                      | -3.049178 | 4.330445  | - | H                     | 1.316684  | 2.453513  |   | H         | 6.559686  | 2.829801  |
| 1.229874                               |           |           |   | 0.250027              |           |           |   | 7.855348  |           |           |
| H                                      | -1.148753 | 5.851559  | - | H                     | -2.708814 | 1.836968  | - | H         | 7.713299  | 1.736801  |
| 0.696435                               |           |           |   | 1.183747              |           |           |   | 8.651906  |           |           |
| C                                      | -1.800886 | -0.588337 | - | H                     | 0.987896  | 4.915413  |   | C         | 8.351748  | 4.738048  |
| 1.187922                               |           |           |   | 0.101562              |           |           |   | 7.021688  |           |           |
| C                                      | -1.595124 | -0.896257 | - | H                     | -3.019496 | 4.288474  | - | H         | 8.956664  | 5.636283  |
| 2.540123                               |           |           |   | 1.370686              |           |           |   | 7.198021  |           |           |
| C                                      | -3.043137 | -0.856710 | - | H                     | -1.177787 | 5.837476  | - | H         | 7.297334  | 5.044435  |
| 0.593762                               |           |           |   | 0.722869              |           |           |   | 6.974861  |           |           |
| C                                      | -2.626350 | -1.456657 | - | C                     | -1.781681 | -0.597077 | - | H         | 8.628993  | 4.316431  |
| 3.293754                               |           |           |   | 1.188161              |           |           |   | 6.046390  |           |           |
| C                                      | -4.071007 | -1.422841 | - | C                     | -1.617299 | -0.833438 | - | C         | 8.179605  | 4.319200  |
| 1.352063                               |           |           |   | 2.560735              |           |           |   | 9.498942  |           |           |
| C                                      | -3.865302 | -1.720409 | - | C                     | -2.993427 | -0.929723 | - | H         | 8.353020  | 3.604086  |
| 2.701321                               |           |           |   | 0.564545              |           |           |   | 10.314673 |           |           |
| H                                      | -0.616816 | -0.708909 | - | C                     | -2.659853 | -1.387113 | - | H         | 7.117928  | 4.604249  |
| 2.988424                               |           |           |   | 3.303453              |           |           |   | 9.511445  |           |           |
| H                                      | -3.209616 | -0.631697 |   | C                     | -4.030960 | -1.492730 | - | H         | 8.772802  | 5.221601  |
| 0.461049                               |           |           |   | 1.312095              |           |           |   | 9.691946  |           |           |
| H                                      | -2.459044 | -1.694716 | - | C                     | -3.867379 | -1.719024 | - | C         | 13.509850 | 2.803305  |
| 4.345766                               |           |           |   | 2.680417              |           |           |   | 7.872657  |           |           |
| H                                      | -5.033860 | -1.634334 | - | H                     | -0.662459 | -0.596665 | - | C         | 13.981204 | 2.981009  |
| 0.883294                               |           |           |   | 3.036354              |           |           |   | 6.420630  |           |           |
| H                                      | -4.668627 | -2.166473 | - | H                     | -3.128395 | -0.755421 |   | H         | 13.578259 | 2.171424  |
| 3.290132                               |           |           |   | 0.503891              |           |           |   | 5.792867  |           |           |
| Se                                     | 1.495117  | -0.454850 | - | H                     | -2.525429 | -1.568028 | - | H         | 15.079525 | 2.940180  |
| 0.856815                               |           |           |   | 4.371298              |           |           |   | 6.379076  |           |           |
| (13) Ph <sub>3</sub> P <sub>2</sub> Te |           |           |   | H                     | -4.968528 | -1.756773 | - | H         | 13.659660 | 3.952948  |
| 35                                     |           |           |   | 0.819647              |           |           |   | 6.021558  |           |           |
| P                                      | -0.414753 | 0.185065  | - | H                     | -4.678527 | -2.161223 | - | C         | 14.090032 | 3.908904  |
| 0.249523                               |           |           |   | 3.261623              |           |           |   | 8.767187  |           |           |
| C                                      | -0.792367 | -0.166247 |   | Te                    | 1.739642  | -0.533688 | - | H         | 13.914731 | 4.914718  |
| 1.509383                               |           |           |   | 0.915587              |           |           |   | 8.368470  |           |           |
| C                                      | -0.411533 | -1.405408 |   | (14) Zwitter ion of S |           |           |   | H         | 15.176740 | 3.760721  |
| 2.045757                               |           |           |   | 85                    |           |           |   | 8.831043  |           |           |
| C                                      | -1.472300 | 0.760785  |   | C                     | 11.112516 | 3.748897  |   | H         | 13.679981 | 3.858261  |
| 2.312689                               |           |           |   | 8.104591              |           |           |   | 9.785510  |           |           |
| C                                      | -0.718477 | -1.717011 |   | C                     | 11.375432 | 5.206501  |   | C         | 13.987291 | 1.440355  |
| 3.369622                               |           |           |   | 8.196286              |           |           |   | 8.398914  |           |           |
| C                                      | -1.768090 | 0.446655  |   | C                     | 11.730437 | 5.921682  |   | H         | 13.675284 | 1.287238  |
| 3.642255                               |           |           |   | 7.042673              |           |           |   | 9.442174  |           |           |
| C                                      | -1.395498 | -0.790990 |   | H                     | 11.796935 | 5.405626  |   | H         | 15.084668 | 1.400965  |
| 4.170694                               |           |           |   | 6.084563              |           |           |   | 8.360631  |           |           |
| H                                      | 0.141631  | -2.113184 |   | C                     | 11.986428 | 7.290449  |   | H         | 13.593847 | 0.625869  |
| 1.424156                               |           |           |   | 7.119325              |           |           |   | 7.770654  |           |           |
| H                                      | -1.766704 | 1.729405  |   | H                     | 12.255277 | 7.839602  |   | C         | 8.793448  | -1.996627 |
| 1.906536                               |           |           |   | 6.215803              |           |           |   | 3.996874  |           |           |
| H                                      | -0.419071 | -2.682754 |   | C                     | 11.902997 | 7.952530  |   | H         | 9.810873  | -2.254428 |
| 3.780192                               |           |           |   | 8.347268              |           |           |   | 3.668351  |           |           |
| H                                      | -2.288531 | 1.175919  |   | H                     | 12.109697 | 9.022263  |   | H         | 8.363708  | -1.297614 |
| 4.265529                               |           |           |   | 8.406830              |           |           |   | 3.264287  |           |           |
| H                                      | -1.625930 | -1.033198 |   | C                     | 11.559008 | 7.240991  |   | H         | 8.184041  | -2.914159 |
| 5.209652                               |           |           |   | 9.499494              |           |           |   | 3.990646  |           |           |
| C                                      | -0.678717 | 1.989290  | - | H                     | 11.502094 | 7.750487  |   | C         | 9.405382  | -2.593836 |
| 0.438087                               |           |           |   | 10.462702             |           |           |   | 6.939018  |           |           |
| C                                      | 0.360226  | 2.862799  | - | C                     | 11.290849 | 5.873672  |   | H         | 8.888960  | -3.542553 |
| 0.083016                               |           |           |   | 9.425857              |           |           |   | 6.723144  |           |           |
| C                                      | -1.897335 | 2.508086  | - | H                     | 11.044273 | 5.317750  |   | H         | 9.200558  | -2.330669 |
| 0.899473                               |           |           |   | 10.330929             |           |           |   | 7.987093  |           |           |
| C                                      | 0.176040  | 4.241657  | - | C                     | 8.532949  | 3.697158  |   | H         | 10.489093 | -2.748357 |
| 0.177702                               |           |           |   | 8.137669              |           |           |   | 6.829046  |           |           |
| C                                      | -2.072049 | 3.890908  | - | C                     | 7.607830  | 2.503102  |   | C         | 7.064222  | -0.725018 |
| 1.002668                               |           |           |   | 7.869566              |           |           |   | 6.197092  |           |           |

|           |           |           |                        |           |           |          |           |           |
|-----------|-----------|-----------|------------------------|-----------|-----------|----------|-----------|-----------|
| H         | 6.385576  | -1.586498 | Si                     | 8.832483  | -1.245713 | H        | 13.625479 | 2.175655  |
| 6.089593  |           |           | 5.738392               |           |           | 5.791074 |           |           |
| H         | 6.692872  | 0.079587  | Si                     | 10.027398 | 1.921224  | H        | 15.113999 | 2.962210  |
| 5.545421  |           |           | 3.801887               |           |           | 6.382702 |           |           |
| H         | 6.999890  | -0.376157 | Si                     | 10.593417 | 0.672874  | H        | 13.688701 | 3.959332  |
| 7.238064  |           |           | 10.974275              |           |           | 6.003079 |           |           |
| C         | 8.171477  | 2.262268  | H                      | 9.858462  | -0.409542 | C        | 14.091325 | 3.952510  |
| 3.581017  |           |           | 8.902008               |           |           | 8.749592 |           |           |
| H         | 7.731308  | 2.754294  | S                      | 12.381747 | -0.399405 | H        | 13.910157 | 4.950900  |
| 4.460600  |           |           | 5.585560               |           |           | 8.335412 |           |           |
| H         | 7.619328  | 1.326027  | (15) Zwitter ion of Se |           |           | H        | 15.178773 | 3.816295  |
| 3.411458  |           |           | 85                     |           |           | 8.826119 |           |           |
| H         | 8.002568  | 2.916058  |                        |           |           | H        | 13.672172 | 3.911437  |
| 2.710508  |           |           | C                      | 11.122822 | 3.737967  | 9.764619 |           |           |
| C         | 10.931352 | 3.581308  | 8.095486               |           |           | C        | 14.029068 | 1.480819  |
| 3.957483  |           |           | C                      | 11.366664 | 5.198354  | 8.414612 |           |           |
| H         | 12.004981 | 3.423435  | 8.191836               |           |           | H        | 13.715719 | 1.339765  |
| 4.131242  |           |           | C                      | 11.719804 | 5.919457  | 9.459111 |           |           |
| H         | 10.531277 | 4.175311  | 7.041364               |           |           | H        | 15.127015 | 1.458245  |
| 4.791085  |           |           | H                      | 11.800577 | 5.404925  | 8.380382 |           |           |
| H         | 10.811990 | 4.171085  | 6.083624               |           |           | H        | 13.651543 | 0.649071  |
| 3.035092  |           |           | C                      | 11.956603 | 7.291403  | 7.799506 |           |           |
| C         | 10.678145 | 1.041860  | 7.120988               |           |           | C        | 8.791271  | -2.013256 |
| 2.258864  |           |           | H                      | 12.224215 | 7.845042  | 4.018165 |           |           |
| H         | 10.617211 | 1.700909  | 6.219856               |           |           | H        | 9.821431  | -2.288793 |
| 1.378395  |           |           | C                      | 11.856370 | 7.950854  | 3.749029 |           |           |
| H         | 10.103656 | 0.128454  | 8.349097               |           |           | H        | 8.406735  | -1.328644 |
| 2.046383  |           |           | H                      | 12.048461 | 9.023141  | 3.247782 |           |           |
| H         | 11.727054 | 0.748029  | 8.411254               |           |           | H        | 8.171810  | -2.923928 |
| 2.411034  |           |           | C                      | 11.514978 | 7.233412  | 4.005297 |           |           |
| C         | 10.692817 | 0.278825  | 9.498408               |           |           | C        | 9.223421  | -2.533572 |
| 9.123265  |           |           | H                      | 11.445796 | 7.740910  | 7.013638 |           |           |
| H         | 11.597272 | -0.323466 | 10.461867              |           |           | H        | 8.693620  | -3.475223 |
| 8.927764  |           |           | C                      | 11.265462 | 5.862780  | 6.799107 |           |           |
| C         | 8.779019  | 0.642923  | 9.421557               |           |           | H        | 8.961533  | -2.229052 |
| 11.494655 |           |           | H                      | 11.021494 | 5.302454  | 8.037692 |           |           |
| H         | 8.678283  | 0.822984  | 10.324538              |           |           | H        | 10.306414 | -2.721444 |
| 12.575736 |           |           | C                      | 8.545518  | 3.655307  | 6.972427 |           |           |
| H         | 8.325620  | -0.335485 | 8.138940               |           |           | C        | 6.967911  | -0.655987 |
| 11.273263 |           |           | C                      | 7.634014  | 2.452753  | 6.086273 |           |           |
| H         | 8.188542  | 1.410221  | 7.863525               |           |           | H        | 6.283589  | -1.508616 |
| 10.972910 |           |           | H                      | 7.860984  | 2.001706  | 5.947722 |           |           |
| C         | 11.526826 | -0.681631 | 6.887426               |           |           | H        | 6.647963  | 0.146396  |
| 11.896101 |           |           | H                      | 6.581822  | 2.766652  | 5.405580 |           |           |
| H         | 12.592576 | -0.678192 | 7.857834               |           |           | H        | 6.848073  | -0.295424 |
| 11.620724 |           |           | H                      | 7.752993  | 1.680000  | 7.118014 |           |           |
| H         | 11.121971 | -1.675586 | 8.637615               |           |           | C        | 8.187284  | 2.289681  |
| 11.652998 |           |           | C                      | 8.352365  | 4.699989  | 3.547510 |           |           |
| H         | 11.457141 | -0.542130 | 7.028622               |           |           | H        | 7.735338  | 2.773341  |
| 12.985652 |           |           | H                      | 8.940781  | 5.607458  | 4.425723 |           |           |
| C         | 11.335294 | 2.344012  | 7.213109               |           |           | H        | 7.628716  | 1.362389  |
| 11.439207 |           |           | H                      | 7.293067  | 4.988502  | 3.352029 |           |           |
| H         | 10.784844 | 3.165883  | 6.979015               |           |           | H        | 8.043878  | 2.957961  |
| 10.961276 |           |           | H                      | 8.640770  | 4.289285  | 2.683407 |           |           |
| H         | 12.391413 | 2.422661  | 6.051969               |           |           | C        | 10.959991 | 3.565654  |
| 11.145727 |           |           | C                      | 8.183400  | 4.266433  | 3.976295 |           |           |
| H         | 11.277438 | 2.486360  | 9.502740               |           |           | H        | 12.026980 | 3.391234  |
| 12.529103 |           |           | H                      | 8.363820  | 3.549651  | 4.172488 |           |           |
| N         | 9.905909  | 3.141191  | 10.315342              |           |           | H        | 10.550202 | 4.163797  |
| 8.160927  |           |           | H                      | 7.118447  | 4.538980  | 4.802066 |           |           |
| N         | 12.022003 | 2.777869  | 9.514565               |           |           | H        | 10.868944 | 4.158456  |
| 7.898954  |           |           | H                      | 8.765554  | 5.174946  | 3.052725 |           |           |
| Si        | 10.689450 | 1.513243  | 9.700545               |           |           | C        | 10.692893 | 1.033439  |
| 7.717526  |           |           | C                      | 13.533348 | 2.827644  | 2.264151 |           |           |
| Si        | 10.485529 | 0.469834  | 7.864735               |           |           | H        | 10.646716 | 1.693265  |
| 5.623088  |           |           | C                      | 14.015198 | 2.994446  | 1.383362 |           |           |
|           |           |           | 6.415128               |           |           |          |           |           |

|                               |           |           |   |           |           |   |           |           |
|-------------------------------|-----------|-----------|---|-----------|-----------|---|-----------|-----------|
| H                             | 10.111580 | 0.125712  | H | 11.987017 | 9.026045  | H | 8.403112  | -1.349489 |
|                               | 2.046282  |           |   | 8.410795  |           |   | 3.263138  |           |
| H                             | 11.737026 | 0.729014  | C | 11.475382 | 7.226698  | H | 8.120014  | -2.924949 |
|                               | 2.427898  |           |   | 9.492636  |           |   | 4.045829  |           |
| C                             | 10.765636 | 0.265317  | H | 11.393145 | 7.731423  | C | 9.117885  | -2.503079 |
|                               | 9.120599  |           |   | 10.456516 |           |   | 7.068366  |           |
| H                             | 11.690053 | -0.307718 | C | 11.246351 | 5.852755  | H | 8.555522  | -3.428288 |
|                               | 8.932783  |           |   | 9.412285  |           |   | 6.865142  |           |
| C                             | 8.831096  | 0.597451  | H | 11.006315 | 5.287386  | H | 8.848794  | -2.165719 |
|                               | 11.482014 |           |   | 10.313084 |           |   | 8.080226  |           |
| H                             | 8.720594  | 0.785116  | C | 8.562096  | 3.623952  | H | 10.192903 | -2.735392 |
|                               | 12.560884 |           |   | 8.120475  |           |   | 7.049626  |           |
| H                             | 8.401396  | -0.393129 | C | 7.660668  | 2.418493  | C | 6.930103  | -0.601008 |
|                               | 11.267456 |           |   | 7.829539  |           |   | 6.056185  |           |
| H                             | 8.225910  | 1.346199  | H | 7.891948  | 1.981589  | H | 6.235015  | -1.441195 |
|                               | 10.950177 |           |   | 6.848578  |           |   | 5.896661  |           |
| C                             | 11.602980 | -0.671171 | H | 6.605911  | 2.723765  | H | 6.643708  | 0.207190  |
|                               | 11.898153 |           |   | 7.827256  |           |   | 5.367935  |           |
| H                             | 12.668665 | -0.650296 | H | 7.785538  | 1.637062  | H | 6.788045  | -0.240732 |
|                               | 11.623355 |           |   | 8.594035  |           |   | 7.084886  |           |
| H                             | 11.215282 | -1.672689 | C | 8.363241  | 4.680780  | C | 8.202003  | 2.314023  |
|                               | 11.658223 |           |   | 7.022820  |           |   | 3.556059  |           |
| H                             | 11.530292 | -0.528813 | H | 8.940224  | 5.592380  | H | 7.759511  | 2.799839  |
|                               | 12.987158 |           |   | 7.222182  |           |   | 4.437475  |           |
| C                             | 11.353087 | 2.349569  | H | 7.301001  | 4.957934  | H | 7.626359  | 1.398937  |
|                               | 11.435485 |           |   | 6.972175  |           |   | 3.353117  |           |
| H                             | 10.786239 | 3.159444  | H | 8.660844  | 4.286733  | H | 8.071869  | 2.991186  |
|                               | 10.956340 |           |   | 6.042095  |           |   | 2.696699  |           |
| H                             | 12.408186 | 2.450655  | C | 8.190969  | 4.215558  | C | 10.999516 | 3.534575  |
|                               | 11.145027 |           |   | 9.490565  |           |   | 3.983607  |           |
| H                             | 11.289177 | 2.490641  | H | 8.374379  | 3.490967  | H | 12.063747 | 3.339994  |
|                               | 12.525216 |           |   | 10.295391 |           |   | 4.175618  |           |
| N                             | 9.925517  | 3.115059  | H | 7.123370  | 4.477652  | H | 10.601622 | 4.133591  |
|                               | 8.160914  |           |   | 9.501302  |           |   | 4.814540  |           |
| N                             | 12.044598 | 2.780725  | H | 8.763036  | 5.127458  | H | 10.916189 | 4.134767  |
|                               | 7.876076  |           |   | 9.701486  |           |   | 3.064163  |           |
| Si                            | 10.728060 | 1.495130  | C | 13.560983 | 2.852718  | C | 10.666094 | 1.021842  |
|                               | 7.712825  |           |   | 7.875883  |           |   | 2.248755  |           |
| Si                            | 10.431968 | 0.468579  | C | 14.061033 | 3.017668  | H | 10.601003 | 1.685090  |
|                               | 5.629698  |           |   | 6.432479  |           |   | 1.371603  |           |
| Si                            | 8.748707  | -1.217395 | H | 13.700108 | 2.187081  | H | 10.076062 | 0.117171  |
|                               | 5.738334  |           |   | 5.806732  |           |   | 2.041982  |           |
| Si                            | 10.033845 | 1.921746  | H | 15.160496 | 3.007761  | H | 11.712281 | 0.711933  |
|                               | 3.796604  |           |   | 6.416269  |           |   | 2.386897  |           |
| Si                            | 10.646876 | 0.662914  | H | 13.720243 | 3.971895  | C | 10.819486 | 0.256314  |
|                               | 10.969863 |           |   | 6.007412  |           |   | 9.114736  |           |
| H                             | 9.956780  | -0.452021 | C | 14.090759 | 3.992685  | H | 11.759623 | -0.295007 |
|                               | 8.897565  |           |   | 8.759137  |           |   | 8.939516  |           |
| Se                            | 12.432950 | -0.539147 | H | 13.902937 | 4.985360  | C | 8.855180  | 0.556587  |
|                               | 5.572367  |           |   | 8.334761  |           |   | 11.456760 |           |
| <b>(16) Zwitter ion of Te</b> |           |           | H | 15.178699 | 3.871212  | H | 8.730115  | 0.748737  |
| <b>85</b>                     |           |           |   | 8.851057  |           |   | 12.533195 |           |
|                               |           |           | H | 13.659164 | 3.953865  | H | 8.448450  | -0.444047 |
|                               |           |           |   | 9.768996  |           |   | 11.244362 |           |
| C                             | 11.137599 | 3.729083  | C | 14.070293 | 1.520358  | H | 8.239889  | 1.289128  |
|                               | 8.081140  |           |   | 8.446943  |           |   | 10.914128 |           |
| C                             | 11.363944 | 5.191946  | H | 13.741760 | 1.383859  | C | 11.644312 | -0.663683 |
|                               | 8.182160  |           |   | 9.487337  |           |   | 11.899905 |           |
| C                             | 11.715445 | 5.919407  | H | 15.168759 | 1.516069  | H | 12.711367 | -0.627454 |
|                               | 7.035179  |           |   | 8.431040  |           |   | 11.632193 |           |
| H                             | 11.811484 | 5.407750  | H | 13.720398 | 0.673883  | H | 11.273493 | -1.671646 |
|                               | 6.077349  |           |   | 7.835498  |           |   | 11.660498 |           |
| C                             | 11.931301 | 7.294540  | C | 8.760378  | -2.028761 | H | 11.562137 | -0.519240 |
|                               | 7.118169  |           |   | 4.051118  |           |   | 12.987968 |           |
| H                             | 12.196936 | 7.853090  | H | 9.788584  | -2.331509 | C | 11.348979 | 2.351905  |
|                               | 6.219512  |           |   | 3.804958  |           |   | 11.431978 |           |
| C                             | 11.812574 | 7.950888  |   |           |           |   |           |           |
|                               | 8.346325  |           |   |           |           |   |           |           |



|                        |           |           |                             |           |           |           |           |           |           |          |
|------------------------|-----------|-----------|-----------------------------|-----------|-----------|-----------|-----------|-----------|-----------|----------|
| H                      | 10.771945 | 3.151778  | H                           | 0.558171  | 3.822547  | -         | H         | 8.842250  | 5.512515  |          |
| 10.948511              |           |           | 3.144008                    |           |           |           | 7.169646  |           |           |          |
| H                      | 12.404376 | 2.470818  | H                           | -2.373134 | 0.689028  | -         | H         | 7.146211  | 4.987200  |          |
| 11.149528              |           |           | 3.586460                    |           |           |           | 7.280805  |           |           |          |
| H                      | 11.274655 | 2.492539  | H                           | -1.477600 | 2.914944  | -         | H         | 8.306333  | 4.042125  |          |
| 12.521039              |           |           | 4.265414                    |           |           |           | 6.311306  |           |           |          |
| N                      | 9.946927  | 3.093922  | C                           | 0.375623  | -1.666297 | -         | C         | 8.332607  | 4.592842  |          |
| 8.138720               |           |           | 0.104317                    |           |           |           | 9.747828  |           |           |          |
| N                      | 12.072061 | 2.783104  | C                           | 0.858891  | -2.635222 | -         | H         | 8.652442  | 4.015661  |          |
| 7.865787               |           |           | 1.001061                    |           |           |           | 10.627344 |           |           |          |
| Si                     | 10.769985 | 1.479996  | C                           | -0.690188 | -2.002407 |           | H         | 7.269692  | 4.846573  |          |
| 7.703642               |           |           | 0.744388                    |           |           |           | 9.872542  |           |           |          |
| Si                     | 10.419014 | 0.452737  | C                           | 0.275928  | -3.901750 | -         | H         | 8.901957  | 5.529316  |          |
| 5.628401               |           |           | 1.063649                    |           |           |           | 9.718432  |           |           |          |
| Si                     | 8.705830  | -1.204057 | C                           | -1.264513 | -3.275494 |           | C         | 13.413197 | 2.922430  |          |
| 5.755426               |           |           | 0.690848                    |           |           |           | 7.643294  |           |           |          |
| Si                     | 10.042339 | 1.910950  | C                           | -0.787231 | -4.226111 | -         | C         | 13.819163 | 3.187846  |          |
| 3.793609               |           |           | 0.215082                    |           |           |           | 6.183497  |           |           |          |
| Si                     | 10.674307 | 0.653523  | H                           | 1.699199  | -2.391947 | -         | H         | 13.375941 | 2.429707  |          |
| 10.962623              |           |           | 1.656381                    |           |           |           | 5.523752  |           |           |          |
| H                      | 10.032008 | -0.482132 | H                           | -1.075265 | -1.264698 |           | H         | 14.913956 | 3.151546  |          |
| 8.884410               |           |           | 1.450484                    |           |           |           | 6.082049  |           |           |          |
| Te                     | 12.576856 | -0.748508 | H                           | 0.659346  | -4.641215 | -         | H         | 13.479799 | 4.183605  |          |
| 5.490393               |           |           | 1.769328                    |           |           |           | 5.864555  |           |           |          |
| (17) Ph <sub>3</sub> P |           |           | H                           | -2.092679 | -3.522524 |           | C         | 14.047484 | 3.984265  |          |
| 34                     |           |           | 1.358222                    |           |           |           | 8.556662  |           |           |          |
| P                      | 1.210352  | -0.022921 | -                           | H         | -1.237812 | -5.219501 | -         | H         | 13.860954 | 5.008562 |
| 0.121410               |           |           | 0.256020                    |           |           |           | 8.214970  |           |           |          |
| C                      | 0.532807  | 0.768072  | (18) Tri-membered ring of S |           |           |           | H         | 15.135214 | 3.826253  |          |
| 1.399647               |           |           | 85                          |           |           |           | 8.556967  |           |           |          |
| C                      | 1.207772  | 0.510684  | C                           | 11.044882 | 3.807402  |           | H         | 13.691546 | 3.890215  |          |
| 2.605776               |           |           | 8.192862                    |           |           |           | 9.591886  |           |           |          |
| C                      | -0.592314 | 1.606613  | C                           | 11.338611 | 5.255961  |           | C         | 13.951395 | 1.549765  |          |
| 1.420496               |           |           | 8.366162                    |           |           |           | 8.088627  |           |           |          |
| C                      | 0.756108  | 1.060348  | C                           | 11.553023 | 6.047924  |           | H         | 13.696703 | 1.351715  |          |
| 3.806444               |           |           | 7.228095                    |           |           |           | 9.138909  |           |           |          |
| C                      | -1.035168 | 2.168870  | H                           | 11.496835 | 5.593424  |           | H         | 15.046573 | 1.540503  |          |
| 2.620877               |           |           | 6.238395                    |           |           |           | 7.994307  |           |           |          |
| C                      | -0.366005 | 1.894665  | C                           | 11.834842 | 7.407970  |           | H         | 13.545345 | 0.740810  |          |
| 3.816377               |           |           | 7.358605                    |           |           |           | 7.469433  |           |           |          |
| H                      | 2.095217  | -0.127528 | H                           | 11.992820 | 8.014147  |           | C         | 8.159003  | -1.520273 |          |
| 2.601031               |           |           | 6.465183                    |           |           |           | 3.795159  |           |           |          |
| H                      | -1.126505 | 1.821959  | C                           | 11.921745 | 7.987267  |           | H         | 9.191307  | -1.883197 |          |
| 0.493411               |           |           | 8.627151                    |           |           |           | 3.684801  |           |           |          |
| H                      | 1.288144  | 0.845549  | H                           | 12.151142 | 9.049215  |           | H         | 7.938356  | -0.860064 |          |
| 4.735230               |           |           | 8.729525                    |           |           |           | 2.943591  |           |           |          |
| H                      | -1.910585 | 2.821503  | C                           | 11.716558 | 7.201025  |           | H         | 7.481646  | -2.387386 |          |
| 2.620590               |           |           | 9.764311                    |           |           |           | 3.739218  |           |           |          |
| H                      | -0.713333 | 2.335024  | H                           | 11.789224 | 7.645284  |           | C         | 8.163533  | -1.847265 |          |
| 4.752801               |           |           | 10.758399                   |           |           |           | 6.856821  |           |           |          |
| C                      | 0.290326  | 0.860948  | -                           | C         | 11.419428 | 5.843897  | H         | 7.531359  | -2.734199 |          |
| 1.452290               |           |           | 9.635563                    |           |           |           | 6.693220  |           |           |          |
| C                      | 0.795587  | 2.110692  | -                           | H         | 11.270448 | 5.233441  | H         | 7.880365  | -1.403572 |          |
| 1.853383               |           |           | 10.526642                   |           |           |           | 7.822693  |           |           |          |
| C                      | -0.854936 | 0.359545  | -                           | C         | 8.513798  | 3.769232  | H         | 9.211384  | -2.173856 |          |
| 2.089499               |           |           | 8.460673                    |           |           |           | 6.923199  |           |           |          |
| C                      | 0.157720  | 2.850477  | -                           | C         | 7.542406  | 2.578089  | C         | 6.183012  | 0.102849  |          |
| 2.849849               |           |           | 8.501490                    |           |           |           | 5.519159  |           |           |          |
| C                      | -1.484030 | 1.094051  | -                           | H         | 7.643263  | 1.964527  | H         | 5.443429  | -0.705397 |          |
| 3.099034               |           |           | 7.596607                    |           |           |           | 5.402469  |           |           |          |
| C                      | -0.983805 | 2.341993  | -                           | H         | 6.507509  | 2.942478  | H         | 6.009901  | 0.837962  |          |
| 3.478464               |           |           | 8.562113                    |           |           |           | 4.720171  |           |           |          |
| H                      | 1.695748  | 2.507126  | -                           | H         | 7.735696  | 1.938845  | H         | 5.992320  | 0.598555  |          |
| 1.376785               |           |           | 9.372092                    |           |           |           | 6.482051  |           |           |          |
| H                      | -1.259491 | -0.610059 | -                           | C         | 8.186460  | 4.633569  | C         | 7.798416  | 2.993566  |          |
| 1.794778               |           |           | 7.229585                    |           |           |           | 3.211146  |           |           |          |

|           |           |           |                                     |           |          |          |           |           |
|-----------|-----------|-----------|-------------------------------------|-----------|----------|----------|-----------|-----------|
| H         | 7.274377  | 3.494543  | S                                   | 11.583685 | 0.223318 | H        | 13.899393 | 5.040202  |
| 4.038596  |           |           | 5.868881                            |           |          | 8.214429 |           |           |
| H         | 7.211165  | 2.108366  | (19) <b>Tri-membered ring of Se</b> |           |          | H        | 15.160634 | 3.859367  |
| 2.925861  |           |           | 85                                  |           |          | 8.603609 |           |           |
| H         | 7.809943  | 3.681771  | C                                   | 11.093710 | 3.829154 | H        | 13.684700 | 3.927454  |
| 2.350989  |           |           | 8.125384                            |           |          | 9.590814 |           |           |
| C         | 10.562754 | 4.096386  | C                                   | 11.381543 | 5.276029 | C        | 14.003106 | 1.584232  |
| 3.997099  |           |           | 8.311686                            |           |          | 8.117079 |           |           |
| H         | 11.565195 | 3.859121  | C                                   | 11.641693 | 6.070767 | H        | 13.730983 | 1.405659  |
| 4.380223  |           |           | 7.184924                            |           |          | 9.166959 |           |           |
| H         | 10.054460 | 4.742664  | H                                   | 11.626676 | 5.618397 | H        | 15.099606 | 1.575479  |
| 4.726641  |           |           | 6.192830                            |           |          | 8.041682 |           |           |
| H         | 10.676556 | 4.664196  | C                                   | 11.911186 | 7.431241 | H        | 13.607311 | 0.766070  |
| 3.060169  |           |           | 7.330666                            |           |          | 7.502517 |           |           |
| C         | 10.371869 | 1.568990  | H                                   | 12.103797 | 8.040778 | C        | 8.176875  | -1.615422 |
| 2.261028  |           |           | 6.446422                            |           |          | 3.916427 |           |           |
| H         | 10.459044 | 2.211492  | C                                   | 11.940918 | 8.007847 | H        | 9.215591  | -1.951368 |
| 1.370532  |           |           | 8.603508                            |           |          | 3.783489 |           |           |
| H         | 9.783108  | 0.681120  | H                                   | 12.159461 | 9.070817 | H        | 7.910183  | -0.984940 |
| 1.987846  |           |           | 8.718180                            |           |          | 3.055483 |           |           |
| H         | 11.378622 | 1.230738  | C                                   | 11.694818 | 7.217664 | H        | 7.522581  | -2.501552 |
| 2.546770  |           |           | 9.729369                            |           |          | 3.906952 |           |           |
| C         | 10.562489 | 0.308726  | H                                   | 11.727247 | 7.658943 | C        | 8.237768  | -1.863892 |
| 8.977901  |           |           | 10.726883                           |           |          | 6.986217 |           |           |
| H         | 11.322231 | -0.448990 | C                                   | 11.410105 | 5.859279 | H        | 7.587875  | -2.745054 |
| 8.729415  |           |           | 9.585251                            |           |          | 6.866483 |           |           |
| C         | 8.998569  | 0.763387  | H                                   | 11.238994 | 5.243334 | H        | 7.988279  | -1.389552 |
| 11.641463 |           |           | 10.468393                           |           |          | 7.947161 |           |           |
| H         | 9.095882  | 0.720495  | C                                   | 8.559692  | 3.803236 | H        | 9.281824  | -2.206858 |
| 12.737373 |           |           | 8.391297                            |           |          | 7.027055 |           |           |
| H         | 8.349201  | -0.068223 | C                                   | 7.564692  | 2.649037 | C        | 6.221437  | 0.030767  |
| 11.328370 |           |           | 8.194378                            |           |          | 5.638985 |           |           |
| H         | 8.486684  | 1.704475  | H                                   | 7.626677  | 2.247256 | H        | 5.491912  | -0.787073 |
| 11.393918 |           |           | 7.174722                            |           |          | 5.524688 |           |           |
| C         | 11.606149 | -0.840022 | H                                   | 6.540040  | 3.008736 | H        | 6.031533  | 0.766489  |
| 11.584580 |           |           | 8.361679                            |           |          | 4.844441 |           |           |
| H         | 12.618752 | -0.935673 | H                                   | 7.761151  | 1.826781 | H        | 6.032281  | 0.518562  |
| 11.162604 |           |           | 8.895541                            |           |          | 6.605961 |           |           |
| H         | 11.066911 | -1.776013 | C                                   | 8.292256  | 4.865386 | C        | 7.715113  | 3.102019  |
| 11.373217 |           |           | 7.311006                            |           |          | 3.434125 |           |           |
| H         | 11.701673 | -0.741045 | H                                   | 8.921889  | 5.754256 | H        | 7.294415  | 3.591963  |
| 12.676637 |           |           | 7.442979                            |           |          | 4.324364 |           |           |
| C         | 11.664359 | 2.200988  | H                                   | 7.241089  | 5.184450 | H        | 7.058513  | 2.259597  |
| 11.318506 |           |           | 7.358572                            |           |          | 3.172009 |           |           |
| H         | 11.171133 | 3.098637  | H                                   | 8.478302  | 4.449193 | H        | 7.684341  | 3.824361  |
| 10.922508 |           |           | 6.311606                            |           |          | 2.602819 |           |           |
| H         | 12.700172 | 2.188210  | C                                   | 8.341203  | 4.414478 | C        | 10.611909 | 4.016510  |
| 10.953153 |           |           | 9.786700                            |           |          | 3.984154 |           |           |
| H         | 11.696845 | 2.286881  | H                                   | 8.584286  | 3.690773 | H        | 11.622549 | 3.700438  |
| 12.415633 |           |           | 10.576385                           |           |          | 4.278704 |           |           |
| N         | 9.874379  | 3.197275  | H                                   | 7.286766  | 4.705575 | H        | 10.210849 | 4.673575  |
| 8.358062  |           |           | 9.901571                            |           |          | 4.768561 |           |           |
| N         | 11.926118 | 2.882842  | H                                   | 8.955426  | 5.310900 | H        | 10.687936 | 4.603377  |
| 7.733489  |           |           | 9.932893                            |           |          | 3.055302 |           |           |
| Si        | 10.647191 | 1.551013  | C                                   | 13.472902 | 2.948190 | C        | 10.091079 | 1.574335  |
| 7.554700  |           |           | 7.639534                            |           |          | 2.191114 |           |           |
| Si        | 9.594432  | 1.076986  | C                                   | 13.921385 | 3.204791 | H        | 10.131218 | 2.244404  |
| 5.566116  |           |           | 6.191335                            |           |          | 1.317734 |           |           |
| Si        | 7.938491  | -0.610637 | H                                   | 13.503143 | 2.438811 | H        | 9.422196  | 0.735473  |
| 5.443275  |           |           | 5.523601                            |           |          | 1.949436 |           |           |
| Si        | 9.569828  | 2.514801  | H                                   | 15.019016 | 3.173359 | H        | 11.097256 | 1.164957  |
| 3.690296  |           |           | 6.124885                            |           |          | 2.364419 |           |           |
| Si        | 10.707069 | 0.646245  | H                                   | 13.586313 | 4.195889 | C        | 10.757757 | 0.310482  |
| 10.839024 |           |           | 5.854135                            |           |          | 8.911673 |           |           |
| H         | 9.598036  | -0.211891 | C                                   | 14.073695 | 4.017645 | H        | 11.708065 | -0.221302 |
| 8.843932  |           |           | 8.566778                            |           |          | 8.745720 |           |           |

|                                          |           |           |          |           |           |   |          |           |           |   |
|------------------------------------------|-----------|-----------|----------|-----------|-----------|---|----------|-----------|-----------|---|
| C                                        | 8.839191  | 0.626846  | H        | 0.987399  | 2.414923  | - | H        | 0.725963  | -2.506017 |   |
| 11.353300                                |           |           | 0.279387 |           |           |   | 0.318688 |           |           |   |
| H                                        | 8.794005  | 0.634974  | C        | 2.596333  | 1.823430  |   | C        | 1.775988  | 0.455377  | - |
| 12.453370                                |           |           | 2.981665 |           |           |   | 1.168089 |           |           |   |
| H                                        | 8.314431  | -0.275801 | H        | 1.909022  | 2.318887  |   | H        | 1.298967  | 1.281074  | - |
| 11.003927                                |           |           | 3.682695 |           |           |   | 1.713649 |           |           |   |
| H                                        | 8.280473  | 1.501492  | H        | 2.499351  | 2.308654  |   | H        | 2.506140  | -0.019352 | - |
| 10.993169                                |           |           | 2.000659 |           |           |   | 1.840073 |           |           |   |
| C                                        | 11.511871 | -0.828529 | H        | 3.623186  | 1.988374  |   | H        | 2.305191  | 0.867298  | - |
| 11.613351                                |           |           | 3.346752 |           |           |   | 0.297816 |           |           |   |
| H                                        | 12.573640 | -0.866263 | C        | 2.631051  | -0.799156 |   | C        | -0.058467 | -1.110486 | - |
| 11.325291                                |           |           | 4.589126 |           |           |   | 1.918054 |           |           |   |
| H                                        | 11.053146 | -1.786572 | H        | 2.455504  | -1.885490 |   | H        | -0.841207 | -1.813640 | - |
| 11.324825                                |           |           | 4.591499 |           |           |   | 1.603240 |           |           |   |
| H                                        | 11.460557 | -0.743743 | H        | 1.980150  | -0.353050 |   | H        | 0.633136  | -1.645013 | - |
| 12.709649                                |           |           | 5.355345 |           |           |   | 2.584747 |           |           |   |
| C                                        | 11.476067 | 2.215568  | H        | 3.679125  | -0.625587 |   | H        | -0.524321 | -0.303104 | - |
| 11.342508                                |           |           | 4.881570 |           |           |   | 2.496178 |           |           |   |
| H                                        | 10.976193 | 3.095073  | C        | 3.532193  | -0.830025 |   | C        | -2.179480 | 2.473496  |   |
| 10.915435                                |           |           | 1.679134 |           |           |   | 2.012829 |           |           |   |
| H                                        | 12.534741 | 2.246902  | H        | 4.553283  | -0.663915 |   | C        | -1.365321 | 3.747170  |   |
| 11.046468                                |           |           | 2.058985 |           |           |   | 1.716624 |           |           |   |
| H                                        | 11.431521 | 2.295958  | H        | 3.469532  | -0.400661 |   | H        | -0.342863 | 3.639994  |   |
| 12.439374                                |           |           | 0.670293 |           |           |   | 2.104972 |           |           |   |
| N                                        | 9.917091  | 3.219704  | H        | 3.378715  | -1.916172 |   | H        | -1.840425 | 4.617058  |   |
| 8.272361                                 |           |           | 1.597553 |           |           |   | 2.193315 |           |           |   |
| N                                        | 11.981487 | 2.904434  | Si       | -0.051700 | -0.178257 |   | H        | -1.315436 | 3.938496  |   |
| 7.683532                                 |           |           | 2.393141 |           |           |   | 0.635711 |           |           |   |
| Si                                       | 10.692441 | 1.578564  | Si       | 0.060856  | 0.098575  |   | C        | -3.590731 | 2.593851  |   |
| 7.515279                                 |           |           | 0.018889 |           |           |   | 1.420162 |           |           |   |
| Si                                       | 9.658506  | 1.011275  | Si       | 2.283371  | -0.054794 |   | H        | -3.569872 | 2.824345  |   |
| 5.541196                                 |           |           | 2.880169 |           |           |   | 0.348122 |           |           |   |
| Si                                       | 7.982680  | -0.666609 | (21) 4   |           |           |   | H        | -4.122999 | 3.409765  |   |
| 5.544048                                 |           |           | 58       |           |           |   | 1.929609 |           |           |   |
| Si                                       | 9.494715  | 2.511958  |          |           |           |   | H        | -4.164786 | 1.668630  |   |
| 3.721730                                 |           |           | C        | -1.134737 | 0.937718  |   | 1.567407 |           |           |   |
| Si                                       | 10.637569 | 0.622150  | 0.232876 |           |           |   | C        | -2.276075 | 2.277446  |   |
| 10.775033                                |           |           | C        | -1.787528 | 1.425516  | - | 3.533586 |           |           |   |
| H                                        | 9.984385  | -0.436667 | 1.008141 |           |           |   | H        | -2.857756 | 1.378632  |   |
| 8.665998                                 |           |           | C        | -1.234701 | 2.484913  | - | 3.779151 |           |           |   |
| Se                                       | 11.771404 | 0.086313  | 1.739557 |           |           |   | H        | -2.771855 | 3.144874  |   |
| 5.645019                                 |           |           | H        | -0.321360 | 2.967666  | - | 3.989859 |           |           |   |
| (20) Si(SiMe <sub>3</sub> ) <sub>2</sub> |           |           | 1.389736 |           |           |   | H        | -1.272587 | 2.184111  |   |
| 27                                       |           |           | C        | -1.856427 | 2.922090  | - | 3.976029 |           |           |   |
| C                                        | 0.562594  | -1.613218 | 2.910819 |           |           |   | C        | -0.665389 | -1.253704 |   |
| 0.650464                                 |           |           | H        | -1.422506 | 3.749190  | - | 3.042272 |           |           |   |
| H                                        | -0.098503 | -2.408815 | 3.474728 |           |           |   | H        | -0.730683 | -0.951664 |   |
| 0.276645                                 |           |           | C        | -3.026752 | 2.303755  | - | 4.103582 |           |           |   |
| H                                        | 1.596657  | -1.867998 | 3.357699 |           |           |   | C        | -2.224496 | -3.772304 |   |
| 0.382303                                 |           |           | H        | -3.508474 | 2.645247  | - | 3.746231 |           |           |   |
| H                                        | 0.481703  | -1.601245 | 4.275276 |           |           |   | H        | -3.122472 | -4.385836 |   |
| 1.749623                                 |           |           | C        | -3.580531 | 1.248016  | - | 3.576477 |           |           |   |
| C                                        | -1.660365 | 0.507505  | 2.627293 |           |           |   | H        | -2.201286 | -3.492964 |   |
| 0.664170                                 |           |           | H        | -4.494910 | 0.762579  | - | 4.810410 |           |           |   |
| H                                        | -1.647959 | 0.528872  | 2.971829 |           |           |   | H        | -1.342520 | -4.398677 |   |
| 1.765817                                 |           |           | C        | -2.966332 | 0.810579  | - | 3.544227 |           |           |   |
| H                                        | -2.002663 | 1.491280  | 1.454309 |           |           |   | C        | -3.791777 | -1.241032 |   |
| 0.309875                                 |           |           | H        | -3.399031 | -0.010654 | - | 3.018140 |           |           |   |
| H                                        | -2.400313 | -0.240443 | 0.880845 |           |           |   | H        | -3.882758 | -0.376519 |   |
| 0.343044                                 |           |           | C        | 0.729242  | -0.578899 | - | 2.346067 |           |           |   |
| C                                        | 1.251466  | 1.415409  | 0.712096 |           |           |   | H        | -3.797690 | -0.870215 |   |
| 0.655023                                 |           |           | C        | 1.445331  | -1.745266 | - | 4.053823 |           |           |   |
| H                                        | 1.182104  | 1.441575  | 0.013548 |           |           |   | H        | -4.683893 | -1.871474 |   |
| 1.754589                                 |           |           | H        | 2.012814  | -1.386118 |   | 2.881629 |           |           |   |
| H                                        | 2.296711  | 1.215542  | 0.858448 |           |           |   | C        | -2.302384 | -2.795854 |   |
| 0.383271                                 |           |           | H        | 2.151612  | -2.219089 | - | 0.844471 |           |           |   |
|                                          |           |           | 0.708687 |           |           |   |          |           |           |   |

|          |           |           |          |           |           |    |                                                        |           |           |
|----------|-----------|-----------|----------|-----------|-----------|----|--------------------------------------------------------|-----------|-----------|
| H        | -1.432057 | -3.412822 | H        | 0.614561  | -1.671613 | -  | H                                                      | 0.187651  | -1.957675 |
| 0.576450 |           |           | 2.575644 |           |           |    | 3.012724                                               |           |           |
| H        | -2.331813 | -1.938722 | H        | -0.529997 | -0.317916 | -  | Se                                                     | 1.686083  | 1.299352  |
| 0.157184 |           |           | 2.496045 |           |           |    | 2.914582                                               |           |           |
| H        | -3.206357 | -3.399888 | C        | -2.186902 | 2.469092  |    | (23) Si <sub>2</sub> (SiMe <sub>3</sub> ) <sub>4</sub> |           |           |
| 0.672271 |           |           | 2.009322 |           |           | 54 |                                                        |           |           |
| N        | -0.138938 | 0.040854  | C        | -1.390236 | 3.752099  |    | C                                                      | 0.447031  | -4.209707 |
| 0.311595 |           |           | 1.707304 |           |           |    | 0.614718                                               |           |           |
| N        | -1.447324 | 1.293974  | H        | -0.365907 | 3.660820  |    | H                                                      | -0.530123 | -4.538888 |
| 1.494746 |           |           | 2.095017 |           |           |    | 0.993412                                               |           |           |
| Si       | -0.037720 | 0.273445  | H        | -1.876927 | 4.616601  |    | H                                                      | 1.222843  | -4.755256 |
| 2.153577 |           |           | 2.182095 |           |           |    | 1.171721                                               |           |           |
| Si       | -2.233945 | -2.237186 | H        | -1.344282 | 3.941127  |    | H                                                      | 0.522137  | -4.496017 |
| 2.645817 |           |           | 0.625926 |           |           |    | 0.446465                                               |           | -         |
| H        | 0.185908  | -1.958792 | C        | -3.600954 | 2.569533  |    | C                                                      | -0.581683 | -1.403979 |
| 3.009060 |           |           | 1.419336 |           |           |    | 0.248106                                               |           | -         |
| S        | 1.565594  | 1.240935  | H        | -3.585010 | 2.800854  |    | H                                                      | -0.483157 | -1.709826 |
| 2.870878 |           |           | 0.347431 |           |           |    | 1.301850                                               |           | -         |
| (22) 5   |           |           | H        | -4.143754 | 3.377600  |    | H                                                      | -0.399508 | -0.321307 |
| 58       |           |           | 1.930089 |           |           |    | 0.187207                                               |           | -         |
|          |           |           | H        | -4.161897 | 1.636313  |    | H                                                      | -1.618007 | -1.586342 |
| C        | -1.130757 | 0.939068  | 1.566998 |           |           |    | 0.062284                                               |           |           |
| 0.229124 |           |           | C        | -2.276927 | 2.276509  |    | C                                                      | 2.390606  | -1.878065 |
| C        | -1.773448 | 1.435646  | 3.530752 |           |           |    | 0.144675                                               |           |           |
| 1.013430 |           | -         | H        | -2.847986 | 1.372346  |    | H                                                      | 2.454500  | -2.154171 |
| C        | -1.209063 | 2.495421  | 3.781451 |           |           |    | 0.920089                                               |           | -         |
| 1.735587 |           | -         | H        | -2.781122 | 3.140094  |    | H                                                      | 3.202110  | -2.397183 |
| H        | -0.295434 | 2.970808  | 3.985050 |           |           |    | 0.673382                                               |           |           |
| 1.376687 |           | -         | H        | -1.271155 | 2.196321  |    | H                                                      | 2.569823  | -0.796045 |
| C        | -1.819961 | 2.942330  | 3.970951 |           |           |    | 0.222914                                               |           |           |
| 2.908853 |           | -         | C        | -0.664630 | -1.254044 |    | C                                                      | 3.797560  | -0.423936 |
| H        | -1.376884 | 3.769549  | 3.047596 |           |           |    | 3.495352                                               |           |           |
| 3.465345 |           | -         | H        | -0.724638 | -0.948574 |    | H                                                      | 3.405048  | 0.573037  |
| C        | -2.990572 | 2.332938  | 4.108081 |           |           |    | 3.741828                                               |           |           |
| 3.367259 |           | -         | C        | -2.204992 | -3.783202 |    | H                                                      | 3.913301  | -0.482254 |
| H        | -3.463821 | 2.681677  | 3.746740 |           |           |    | 2.404058                                               |           |           |
| 4.286520 |           | -         | H        | -3.103665 | -4.397822 |    | H                                                      | 4.796785  | -0.520273 |
| C        | -3.555610 | 1.276616  | 3.585142 |           |           |    | 3.949283                                               |           |           |
| 2.646300 |           | -         | H        | -2.166987 | -3.512296 |    | C                                                      | 2.582032  | -1.655789 |
| H        | -4.470248 | 0.798344  | 4.812659 |           |           |    | 6.032456                                               |           |           |
| 2.999979 |           | -         | H        | -1.324387 | -4.405462 |    | H                                                      | 1.822754  | -2.327039 |
| C        | -2.952589 | 0.829675  | 3.526828 |           |           |    | 6.457232                                               |           |           |
| 1.471034 |           | -         | C        | -3.790108 | -1.250124 |    | H                                                      | 2.360001  | -0.631211 |
| H        | -3.394196 | 0.007953  | 3.058270 |           |           |    | 6.357254                                               |           |           |
| 0.905157 |           | -         | H        | -3.893954 | -0.383791 |    | H                                                      | 3.561664  | -1.939308 |
| C        | 0.725641  | -0.589617 | 2.390425 |           |           |    | 6.448852                                               |           |           |
| 0.713229 |           | -         | H        | -3.782913 | -0.882831 |    | C                                                      | 3.389100  | -3.475748 |
| C        | 1.440759  | -1.754467 | 4.095174 |           |           |    | 3.715150                                               |           |           |
| 0.011492 |           | -         | H        | -4.681904 | -1.882981 |    | H                                                      | 4.396881  | -3.566338 |
| H        | 2.011102  | -1.392874 | 2.931776 |           |           |    | 4.151865                                               |           |           |
| 0.857697 |           |           | C        | -2.321681 | -2.780769 |    | H                                                      | 3.477972  | -3.626165 |
| H        | 2.144964  | -2.231667 | 0.853703 |           |           |    | 2.630023                                               |           |           |
| 0.706407 |           | -         | H        | -1.451620 | -3.390709 |    | H                                                      | 2.768039  | -4.288593 |
| H        | 0.721027  | -2.512878 | 0.569409 |           |           |    | 4.118434                                               |           |           |
| 0.325328 |           |           | H        | -2.363558 | -1.916777 |    | Si                                                     | 0.547194  | -1.687584 |
| C        | 1.773707  | 0.438297  | 0.175704 |           |           |    | 3.082208                                               |           |           |
| 1.179639 |           | -         | H        | -3.224651 | -3.387489 |    | Si                                                     | 0.676042  | -2.340554 |
| H        | 1.297800  | 1.263603  | 0.686007 |           |           |    | 0.811898                                               |           |           |
| 1.726641 |           | -         | N        | -0.139167 | 0.037119  |    | Si                                                     | 2.652086  | -1.781993 |
| H        | 2.497769  | -0.043188 | 0.310317 |           |           |    | 4.150046                                               |           |           |
| 1.853343 |           | -         | N        | -1.443876 | 1.295299  |    | Si                                                     | -1.394706 | -1.390551 |
| H        | 2.309676  | 0.851688  | 1.491379 |           |           |    | 4.047567                                               |           |           |
| 0.314122 |           | -         | Si       | -0.040688 | 0.269111  |    | Si                                                     | -1.787466 | -0.325575 |
| C        | -0.070290 | -1.124709 | 2.150224 |           |           |    | 6.119236                                               |           |           |
| 1.912158 |           | -         | Si       | -2.235184 | -2.239657 |    | Si                                                     | -3.419270 | -1.831351 |
| H        | -0.858517 | -1.817873 | 2.659151 |           |           |    | 2.903242                                               |           |           |
| 1.589004 |           | -         |          |           |           |    |                                                        |           |           |

|                                   |           |           |          |           |           |          |           |           |
|-----------------------------------|-----------|-----------|----------|-----------|-----------|----------|-----------|-----------|
| C                                 | -3.038489 | 1.058972  | C        | 11.030187 | 15.095547 | H        | 7.903629  | 8.113589  |
| 5.774756                          |           |           | 3.841430 |           |           | 3.865130 |           |           |
| H                                 | -3.971694 | 0.679276  | H        | 11.244817 | 14.669962 | H        | 7.161984  | 9.554333  |
| 5.337069                          |           |           | 4.832148 |           |           | 3.133078 |           |           |
| H                                 | -3.291173 | 1.573091  | H        | 11.190719 | 16.180505 | C        | 9.902985  | 12.292721 |
| 6.715973                          |           |           | 3.896330 |           |           | 3.483461 |           |           |
| H                                 | -2.618642 | 1.802771  | H        | 11.751954 | 14.692408 | C        | 5.350204  | 12.610252 |
| 5.082342                          |           |           | 3.122178 |           |           | 1.061701 |           | -         |
| C                                 | -2.534803 | -1.538958 | C        | 9.570085  | 14.855112 | H        | 5.354017  | 13.693016 |
| 7.365634                          |           |           | 3.427594 |           |           | 0.869738 |           | -         |
| H                                 | -1.828325 | -2.349379 | C        | 9.341807  | 15.322986 | H        | 4.319421  | 12.253821 |
| 7.595285                          |           |           | 1.982570 |           |           | 0.924872 |           | -         |
| H                                 | -2.774913 | -1.018036 | H        | 9.988702  | 14.769560 | H        | 5.642424  | 12.430659 |
| 8.306442                          |           |           | 1.287273 |           |           | 2.108296 |           | -         |
| H                                 | -3.459127 | -1.993587 | H        | 9.584379  | 16.391090 | C        | 14.006963 | 12.006357 |
| 6.983269                          |           |           | 1.896112 |           |           | 2.285144 |           |           |
| C                                 | -0.260676 | 0.471201  | H        | 8.288663  | 15.179001 | H        | 15.051853 | 11.942510 |
| 6.894120                          |           |           | 1.696636 |           |           | 1.978006 |           |           |
| H                                 | -0.579728 | 1.138251  | C        | 11.678666 | 12.361688 | C        | 7.009214  | 12.760899 |
| 7.710675                          |           |           | 1.731301 |           |           | 5.633184 |           |           |
| H                                 | 0.414226  | -0.282904 | H        | 10.903458 | 12.571817 | H        | 6.077638  | 12.174099 |
| 7.318228                          |           |           | 0.994057 |           |           | 5.710301 |           |           |
| H                                 | 0.301920  | 1.069583  | C        | 8.662990  | 15.650156 | H        | 6.660115  | 13.807481 |
| 6.164064                          |           |           | 4.378469 |           |           | 5.597483 |           |           |
| C                                 | -3.305076 | -3.376854 | H        | 7.602264  | 15.519500 | C        | 8.308777  | 12.281169 |
| 1.817033                          |           |           | 4.112767 |           |           | 0.298853 |           | -         |
| H                                 | -2.585665 | -3.268185 | H        | 8.902197  | 16.718618 | H        | 8.530713  | 12.085486 |
| 0.995564                          |           |           | 4.298616 |           |           | 1.359446 |           | -         |
| H                                 | -3.004357 | -4.248085 | H        | 8.819997  | 15.347650 | H        | 9.039952  | 11.727336 |
| 2.416599                          |           |           | 5.423674 |           |           | 0.306305 |           |           |
| H                                 | -4.291473 | -3.590043 | C        | 12.325191 | 11.913654 | H        | 8.442301  | 13.355408 |
| 1.374919                          |           |           | 4.023213 |           |           | 0.109879 |           | -         |
| C                                 | -3.968478 | -0.347296 | H        | 12.060200 | 11.804100 | C        | 4.324054  | 9.215641  |
| 1.863426                          |           |           | 5.075271 |           |           | 3.265743 |           |           |
| H                                 | -4.103317 | 0.543719  | C        | 13.660469 | 11.833630 | H        | 4.968377  | 8.971811  |
| 2.493799                          |           |           | 3.627208 |           |           | 4.122304 |           |           |
| H                                 | -3.226181 | -0.100623 | H        | 14.433324 | 11.641537 | H        | 4.766045  | 8.764536  |
| 1.091676                          |           |           | 4.373110 |           |           | 2.365918 |           |           |
| H                                 | -4.927313 | -0.561645 | C        | 13.013282 | 12.267658 | H        | 3.347917  | 8.733775  |
| 1.364513                          |           |           | 1.338495 |           |           | 3.436708 |           |           |
| C                                 | -4.761808 | -2.187453 | H        | 13.276515 | 12.405843 | C        | 7.299876  | 13.704699 |
| 4.195592                          |           |           | 0.288855 |           |           | 8.514881 |           |           |
| H                                 | -5.709887 | -2.412004 | C        | 9.777915  | 9.402121  | H        | 6.213005  | 13.589109 |
| 3.681276                          |           |           | 2.319848 |           |           | 8.641355 |           |           |
| H                                 | -4.499109 | -3.059078 | H        | 9.132426  | 9.799836  | H        | 7.489600  | 14.741758 |
| 4.812244                          |           |           | 1.525643 |           |           | 8.198715 |           |           |
| H                                 | -4.938128 | -1.336334 | H        | 9.782272  | 8.305939  | H        | 7.772949  | 13.560093 |
| 4.866803                          |           |           | 2.238720 |           |           | 9.497953 |           |           |
| (24) (6) <sub>2</sub> (gas phase) |           |           | H        | 10.802144 | 9.755951  | C        | 3.419209  | 11.764124 |
| 170                               |           |           | 2.148652 |           |           | 4.724339 |           |           |
|                                   |           |           | C        | 9.252488  | 9.811231  | H        | 2.376825  | 11.442829 |
| Te                                | 5.246799  | 14.752203 | 3.705267 |           |           | 4.875939 |           |           |
| 2.504096                          |           |           | C        | 9.829421  | 12.742101 | H        | 3.449467  | 12.863646 |
| Si                                | 7.634442  | 12.460105 | 7.072041 |           |           | 4.720104 |           |           |
| 3.897622                          |           |           | H        | 10.074484 | 13.750968 | H        | 4.006635  | 11.399069 |
| Si                                | 5.919037  | 12.383050 | 6.711060 |           |           | 5.579932 |           |           |
| 2.313885                          |           |           | H        | 10.261264 | 12.013031 | C        | 6.403452  | 9.864929  |
| Si                                | 6.540817  | 11.741445 | 6.373142 |           |           | 0.143402 |           | -         |
| 0.116876                          |           |           | H        | 10.320992 | 12.607738 | H        | 5.364324  | 9.530114  |
| Si                                | 4.067667  | 11.088899 | 8.047413 |           |           | 0.010046 |           | -         |
| 3.081195                          |           |           | C        | 11.326264 | 12.179245 | H        | 7.030093  | 9.294761  |
| Si                                | 7.967829  | 12.483887 | 3.077036 |           |           | 0.557720 |           |           |
| 7.243288                          |           |           | C        | 7.856981  | 9.209729  | H        | 6.713543  | 9.595763  |
| N                                 | 9.172217  | 13.422238 | 3.910887 |           |           | 1.165544 |           | -         |
| 3.536909                          |           |           | H        | 7.444960  | 9.490429  | C        | 10.197603 | 9.287918  |
| N                                 | 9.079281  | 11.277806 | 4.891566 |           |           | 4.800035 |           |           |
| 3.823121                          |           |           |          |           |           |          |           |           |

|          |           |             |          |           |             |          |           |             |
|----------|-----------|-------------|----------|-----------|-------------|----------|-----------|-------------|
| H        | 11.225096 | 9.639311    | H        | 5.964817  | 24.758133   | H        | 5.832134  | 21.064215   |
| 4.643331 |           |             | 0.677161 |           |             | 5.738843 |           |             |
| H        | 10.212076 | 8.188890    | C        | 2.541761  | 21.193877   | H        | 6.392581  | 22.679965   |
| 4.781779 |           |             | 2.008928 |           |             | 6.248608 |           |             |
| H        | 9.863204  | 9.609929    | H        | 2.819289  | 21.105149   | C        | 10.684753 | 18.990577   |
| 5.795262 |           |             | 0.958387 |           |             | 2.568559 |           |             |
| C        | 2.756196  | 11.371348   | C        | 1.207443  | 21.058961   | H        | 10.036071 | 18.820926   |
| 1.744835 |           |             | 2.392888 |           |             | 1.697576 |           |             |
| H        | 1.787234  | 10.963328   | H        | 0.448394  | 20.847483   | H        | 10.258788 | 18.439727   |
| 2.072977 |           |             | 1.638209 |           |             | 3.419558 |           |             |
| H        | 3.029038  | 10.877194   | C        | 1.821964  | 21.474813   | H        | 11.673072 | 18.558178   |
| 0.800607 |           |             | 4.693736 |           |             | 2.343081 |           |             |
| H        | 2.633853  | 12.446524   | H        | 1.547089  | 21.581141   | C        | 7.601025  | 23.149431 - |
| 1.549216 |           |             | 5.744122 |           |             | 2.417229 |           |             |
| C        | 7.649573  | 10.721023   | C        | 5.156960  | 18.729418   | H        | 8.691892  | 23.054242 - |
| 7.841636 |           |             | 3.706287 |           |             | 2.525486 |           |             |
| H        | 8.153908  | 10.535369   | H        | 5.776080  | 19.137629   | H        | 7.387318  | 24.182884 - |
| 8.802070 |           |             | 4.516398 |           |             | 2.104872 |           |             |
| H        | 8.013144  | 9.969960    | H        | 5.194772  | 17.631479   | H        | 7.147546  | 22.995497 - |
| 7.125578 |           |             | 3.762610 |           |             | 3.408219 |           |             |
| H        | 6.573285  | 10.545515   | H        | 4.117131  | 19.038798   | C        | 11.534412 | 21.717917   |
| 7.990809 |           |             | 3.870373 |           |             | 1.434599 |           |             |
| Te       | 9.415574  | 24.353327   | C        | 5.682407  | 19.186084   | H        | 12.594235 | 21.455163   |
| 3.785296 |           |             | 2.336507 |           |             | 1.289953 |           |             |
| Si       | 7.209111  | 21.895867   | C        | 5.066152  | 22.133220 - | H        | 11.455126 | 22.807406   |
| 2.198557 |           |             | 1.021243 |           |             | 1.563749 |           |             |
| Si       | 8.917779  | 21.942589   | H        | 4.794105  | 23.139612 - | H        | 10.991737 | 21.436325   |
| 3.800466 |           |             | 0.672915 |           |             | 0.520473 |           |             |
| Si       | 8.327952  | 21.127737   | H        | 4.638112  | 21.400496 - | C        | 8.515693  | 19.242745   |
| 5.946908 |           |             | 0.323812 |           |             | 6.108142 |           |             |
| Si       | 10.857771 | 20.841478   | H        | 4.594988  | 21.979421 - | H        | 9.553250  | 18.937146   |
| 2.967815 |           |             | 2.003859 |           |             | 5.906193 |           |             |
| Si       | 6.935519  | 21.914101 - | C        | 3.523438  | 21.477543   | H        | 7.861830  | 18.695910   |
| 1.156011 |           |             | 2.967429 |           |             | 5.414024 |           |             |
| N        | 5.632200  | 22.805032   | C        | 7.093997  | 18.625951   | H        | 8.263287  | 18.917485   |
| 2.527134 |           |             | 2.128687 |           |             | 7.130087 |           |             |
| N        | 5.813111  | 20.663374   | H        | 7.505218  | 18.937932   | C        | 4.764201  | 18.662467   |
| 2.257454 |           |             | 1.157086 |           |             | 1.220109 |           |             |
| C        | 3.720774  | 24.404590   | H        | 7.059966  | 17.527484   | H        | 3.721921  | 18.963355   |
| 2.189974 |           |             | 2.147634 |           |             | 1.384523 |           |             |
| H        | 3.551422  | 23.978081   | H        | 7.774973  | 18.970072   | H        | 4.799112  | 17.562949   |
| 1.190851 |           |             | 2.919975 |           |             | 1.201296 |           |             |
| H        | 3.518715  | 25.482989   | C        | 4.946046  | 21.645134   | H        | 5.088674  | 19.033096   |
| 2.135275 |           |             | 2.576973 |           |             | 0.238134 |           |             |
| H        | 2.995616  | 23.966035   | C        | 9.490730  | 21.954658   | C        | 12.125170 | 21.014683   |
| 2.884908 |           |             | 7.183403 |           |             | 4.365503 |           |             |
| C        | 5.177256  | 24.218311   | H        | 9.473342  | 23.045171   | H        | 13.118603 | 20.684520   |
| 2.644250 |           |             | 7.041733 |           |             | 4.022877 |           |             |
| C        | 5.344463  | 24.679737   | H        | 10.528260 | 21.618895   | H        | 11.847872 | 20.407826   |
| 4.100252 |           |             | 7.044810 |           |             | 5.240096 |           |             |
| H        | 4.699997  | 24.094198   | H        | 9.186410  | 21.722062   | H        | 12.197920 | 22.064806   |
| 4.771287 |           |             | 8.216093 |           |             | 4.683659 |           |             |
| H        | 5.061140  | 25.738477   | C        | 0.845162  | 21.195435   | C        | 7.307196  | 20.162125 - |
| 4.191304 |           |             | 3.734966 |           |             | 1.753651 |           |             |
| H        | 6.394641  | 24.578597   | H        | -0.198535 | 21.085262   | H        | 6.833316  | 19.971844 - |
| 4.415605 |           |             | 4.033086 |           |             | 2.728625 |           |             |
| C        | 3.155371  | 21.622574   | C        | 7.856543  | 22.211235   | H        | 6.940980  | 19.398463 - |
| 4.313224 |           |             | 0.471533 |           |             | 1.052979 |           |             |
| H        | 3.918302  | 21.841708   | H        | 8.796035  | 21.635032   | H        | 8.390988  | 20.012395 - |
| 5.060662 |           |             | 0.410898 |           |             | 1.874508 |           |             |
| C        | 6.080808  | 25.058793   | H        | 8.191269  | 23.262694   |          |           |             |
| 1.728656 |           |             | 0.514989 |           |             |          |           |             |
| H        | 7.137015  | 24.964740   | C        | 6.544997  | 21.599546   |          |           |             |
| 2.026577 |           |             | 6.381365 |           |             |          |           |             |
| H        | 5.801346  | 26.117983   | H        | 6.317777  | 21.342025   |          |           |             |
| 1.815430 |           |             | 7.427500 |           |             |          |           |             |

(III) B3-LYP/6-31g(d) optimized geometries of compounds 2 and 6.

(1) 2  
84

|          |           |           |          |           |           |           |          |          |           |           |   |
|----------|-----------|-----------|----------|-----------|-----------|-----------|----------|----------|-----------|-----------|---|
| C        | -1.758961 | -0.343246 | H        | -1.054834 | -1.793980 | -         | H        | 0.436006 | -3.804445 |           |   |
| 0.009947 |           |           | 3.915975 |           |           |           | 1.307623 |          |           |           |   |
| C        | -3.085816 | -1.014374 | -        | H         | -2.036907 | -2.123397 | -        | H        | 0.873809  | -4.810033 | - |
| 0.147646 |           |           | 2.483103 |           |           |           | 0.083925 |          |           |           |   |
| C        | -3.177840 | -2.409876 | -        | C         | -2.154172 | 0.589986  | -        | C        | 2.873076  | -2.946232 | - |
| 0.041822 |           |           | 3.042748 |           |           |           | 1.796074 |          |           |           |   |
| H        | -2.283505 | -2.999375 |          | H         | -3.117857 | 0.191358  | -        | H        | 2.959470  | -4.000635 | - |
| 0.134016 |           |           | 2.716226 |           |           |           | 2.093667 |          |           |           |   |
| C        | -4.415512 | -3.042772 | -        | H         | -2.120490 | 0.527639  | -        | H        | 3.842574  | -2.469253 | - |
| 0.166521 |           |           | 4.136258 |           |           |           | 1.983571 |          |           |           |   |
| H        | -4.474792 | -4.124148 | -        | H         | -2.100686 | 1.646664  | -        | H        | 2.142578  | -2.471828 | - |
| 0.084253 |           |           | 2.761735 |           |           |           | 2.461781 |          |           |           |   |
| C        | -5.569258 | -2.290709 | -        | C         | 0.341713  | 0.352377  | -        | C        | 0.607180  | 2.395880  |   |
| 0.394913 |           |           | 3.017742 |           |           |           | 0.357066 |          |           |           |   |
| H        | -6.531868 | -2.784914 | -        | H         | 0.463722  | 1.414561  | -        | H        | 1.506099  | 2.609149  | - |
| 0.489821 |           |           | 2.781265 |           |           |           | 0.240592 |          |           |           |   |
| C        | -5.482167 | -0.901053 | -        | H         | 0.343922  | 0.248238  | -        | C        | -0.186640 | 5.269855  |   |
| 0.499758 |           |           | 4.107422 |           |           |           | 1.031615 |          |           |           |   |
| H        | -6.376042 | -0.309037 | -        | H         | 1.204858  | -0.189992 | -        | H        | -0.817624 | 6.136578  |   |
| 0.673772 |           |           | 2.620410 |           |           |           | 0.798308 |          |           |           |   |
| C        | -4.247374 | -0.263663 | -        | C         | 4.019701  | 1.063485  | -        | H        | 0.858493  | 5.573960  |   |
| 0.377302 |           |           | 1.798529 |           |           |           | 0.896370 |          |           |           |   |
| H        | -4.188826 | 0.817904  | -        | H         | 3.180127  | 1.737604  | -        | H        | -0.326388 | 5.034629  |   |
| 0.443439 |           |           | 2.007649 |           |           |           | 2.094037 |          |           |           |   |
| C        | -1.586944 | -0.186567 |          | H         | 3.897081  | 0.179528  | -        | C        | -0.400549 | 4.313813  | - |
| 2.584899 |           |           | 2.435470 |           |           |           | 1.878203 |          |           |           |   |
| C        | -0.766367 | 0.812541  |          | H         | 4.940502  | 1.576085  | -        | H        | -0.653682 | 3.515042  | - |
| 3.421726 |           |           | 2.110058 |           |           |           | 2.584493 |          |           |           |   |
| H        | 0.307756  | 0.649033  |          | C         | 4.436182  | 2.187795  |          | H        | 0.635559  | 4.614396  | - |
| 3.287661 |           |           | 1.019444 |           |           |           | 2.077043 |          |           |           |   |
| H        | -0.999124 | 0.679872  |          | H         | 5.331262  | 2.694499  |          | H        | -1.042442 | 5.172457  | - |
| 4.483284 |           |           | 0.633655 |           |           |           | 2.111606 |          |           |           |   |
| H        | -1.005839 | 1.845744  |          | H         | 4.602141  | 1.975635  |          | C        | -2.441137 | 3.348184  |   |
| 3.147679 |           |           | 2.082255 |           |           |           | 0.222147 |          |           |           |   |
| C        | -1.238607 | -1.622473 |          | H         | 3.600625  | 2.893850  |          | H        | -2.617864 | 3.000723  |   |
| 3.024071 |           |           | 0.952732 |           |           |           | 1.245834 |          |           |           |   |
| H        | -1.824771 | -2.358803 |          | C         | 5.684717  | -0.482003 |          | H        | -2.775408 | 2.563096  | - |
| 2.465248 |           |           | 0.241574 |           |           |           | 0.464241 |          |           |           |   |
| H        | -1.460430 | -1.752628 |          | H         | 6.567798  | 0.090658  | -        | H        | -3.074783 | 4.227913  |   |
| 4.089548 |           |           | 0.072082 |           |           |           | 0.054782 |          |           |           |   |
| H        | -0.174521 | -1.823262 |          | H         | 5.645259  | -1.391054 | -        | N        | -1.183717 | 0.018958  |   |
| 2.865616 |           |           | 0.370030 |           |           |           | 1.167203 |          |           |           |   |
| C        | -3.082967 | 0.091877  |          | H         | 5.838433  | -0.788602 |          | N        | -0.897542 | -0.019607 | - |
| 2.820111 |           |           | 1.282883 |           |           |           | 0.971994 |          |           |           |   |
| H        | -3.368986 | 1.075998  |          | C         | 3.695826  | -3.793316 |          | Si       | 0.407809  | 0.507047  |   |
| 2.434412 |           |           | 1.013661 |           |           |           | 0.295117 |          |           |           |   |
| H        | -3.274884 | 0.082820  |          | H         | 3.438402  | -3.855083 |          | Si       | 2.291297  | -0.631696 |   |
| 3.898649 |           |           | 2.077625 |           |           |           | 1.011578 |          |           |           |   |
| H        | -3.727419 | -0.661280 |          | H         | 4.687946  | -3.332798 |          | Si       | 4.104073  | 0.574721  |   |
| 2.363058 |           |           | 0.942584 |           |           |           | 0.049742 |          |           |           |   |
| C        | -0.974399 | -0.201297 | -        | H         | 3.774673  | -4.817836 |          | Si       | 2.380325  | -2.800296 |   |
| 2.444912 |           |           | 0.625179 |           |           |           | 0.047580 |          |           |           |   |
| C        | -1.094021 | -1.689725 | -        | C         | 0.748378  | -3.773835 |          | Si       | -0.621986 | 3.787872  | - |
| 2.825782 |           |           | 0.257458 |           |           |           | 0.069769 |          |           |           |   |
| H        | -0.267904 | -2.266288 | -        | H         | -0.067994 | -3.331617 | -        | H        | 0.930108  | 2.574214  |   |
| 2.399411 |           |           | 0.324459 |           |           |           | 1.394192 |          |           |           |   |

|          |           |           |          |           |           |   |          |           |           |        |
|----------|-----------|-----------|----------|-----------|-----------|---|----------|-----------|-----------|--------|
| (2) 6    |           |           | C        | 4.672742  | -3.287355 | - | H        | -0.402482 | -3.601396 | -      |
| 85       |           |           | 0.087503 |           |           |   | 0.821552 |           |           |        |
| Te       | -2.878543 | -0.267706 | H        | 4.649011  | -4.369420 | - | C        | -2.954145 | 1.151178  |        |
| 2.213573 |           |           | 0.176251 |           |           |   | 3.323070 |           |           |        |
| Si       | 0.133179  | 0.618073  | C        | 2.008018  | -1.483679 |   | H        | -2.078829 | 1.805457  |        |
| 0.007652 |           |           | 2.981844 |           |           |   | 3.402743 |           |           |        |
| Si       | -2.011498 | -0.429535 | H        | 1.133244  | -2.073717 |   | H        | -2.723432 | 0.212655  |        |
| 0.135440 |           |           | 2.692265 |           |           |   | 3.839827 |           |           |        |
| Si       | -1.981870 | -2.687747 | H        | 2.100840  | -1.528010 |   | H        | -3.775249 | 1.635095  |        |
| 0.907121 |           |           | 4.072620 |           |           |   | 3.868824 |           |           |        |
| Si       | -3.482568 | 0.872854  | H        | 2.898605  | -1.949109 |   | C        | 0.824797  | 5.257263  | -      |
| 1.510677 |           |           | 2.553095 |           |           |   | 1.222644 |           |           |        |
| Si       | 1.320685  | 3.828388  | C        | 1.853478  | -0.015437 |   | H        | -0.179496 | 5.627830  | -      |
| 0.081863 |           |           | 2.541476 |           |           |   | 0.984124 |           |           |        |
| N        | 1.456224  | -0.134535 | C        | 3.065280  | 3.254773  | - | H        | 0.820395  | 4.948648  | -      |
| 1.064805 |           |           | 0.547316 |           |           |   | 2.275192 |           |           |        |
| N        | 1.567054  | 0.100327  | H        | 3.117619  | 2.888657  | - | H        | 1.521783  | 6.099132  | -      |
| 1.083984 |           |           | 1.578872 |           |           |   | 1.125932 |           |           |        |
| C        | 3.188565  | -0.279676 | H        | 3.413721  | 2.455410  |   | C        | -3.817916 | 2.580399  |        |
| 2.896095 |           |           | 0.115661 |           |           |   | 0.746575 |           |           |        |
| H        | 3.639547  | 0.647444  | H        | 3.771325  | 4.089765  | - | H        | -4.702745 | 3.031086  |        |
| 2.526939 |           |           | 0.458162 |           |           |   | 1.215186 |           |           |        |
| H        | 3.266383  | -0.278235 | C        | 3.493596  | -1.172304 |   | H        | -4.004474 | 2.493963  | -      |
| 3.988305 |           |           | 0.029840 |           |           |   | 0.328776 |           |           |        |
| H        | 3.771997  | -1.124370 | C        | 0.643568  | 0.598779  |   | H        | -2.980776 | 3.273882  |        |
| 2.526300 |           |           | 3.262343 |           |           |   | 0.890474 |           |           |        |
| C        | 1.696121  | -0.369095 | H        | 0.492052  | 1.642268  |   | C        | -2.022673 | -2.826692 |        |
| 2.524561 |           |           | 2.964713 |           |           |   | 2.810991 |           |           |        |
| C        | 1.130938  | -1.745766 | H        | 0.804647  | 0.580502  |   | H        | -2.922009 | -2.352271 |        |
| 2.920376 |           |           | 4.344579 |           |           |   | 3.221912 |           |           |        |
| H        | 1.651500  | -2.552112 | H        | -0.272096 | 0.039543  |   | H        | -1.154473 | -2.366510 |        |
| 2.393375 |           |           | 3.050472 |           |           |   | 3.296527 |           |           |        |
| H        | 1.266243  | -1.903392 | C        | 2.209821  | -0.411755 |   | H        | -2.044940 | -3.883390 |        |
| 3.996456 |           |           | 0.012570 |           |           |   | 3.109508 |           |           |        |
| H        | 0.059906  | -1.802301 | C        | -3.539923 | -3.541278 |   | C        | 3.116959  | 0.782740  |        |
| 2.701874 |           |           | 0.240874 |           |           |   | 2.918764 |           |           |        |
| C        | 3.475959  | -2.569848 | H        | -3.580579 | -3.471080 | - | H        | 4.018261  | 0.339977  |        |
| 0.091569 |           |           | 0.850933 |           |           |   | 2.488929 |           |           |        |
| H        | 2.529974  | -3.093770 | H        | -4.453969 | -3.082102 |   | H        | 3.234531  | 0.786789  |        |
| 0.181338 |           |           | 0.633260 |           |           |   | 4.007986 |           |           |        |
| C        | 0.943674  | 0.735157  | H        | -3.543595 | -4.602324 |   | H        | 3.041631  | 1.821081  |        |
| 3.287470 |           |           | 0.524058 |           |           |   | 2.581076 |           |           |        |
| H        | -0.131394 | 0.702732  | C        | 5.893008  | -2.617503 |   | C        | -5.118450 | -0.098911 |        |
| 3.080539 |           |           | 0.025882 |           |           |   | 1.544555 |           |           |        |
| H        | 1.075962  | 0.582171  | H        | 6.823556  | -3.177558 |   | H        | -5.906493 | 0.505478  |        |
| 4.363510 |           |           | 0.023504 |           |           |   | 2.012821 |           |           |        |
| H        | 1.337175  | 1.726557  | C        | -0.012713 | 2.474985  | - | H        | -5.027315 | -1.028444 |        |
| 3.036889 |           |           | 0.266645 |           |           |   | 2.119120 |           |           |        |
| C        | 4.720609  | -0.503525 | H        | -0.854007 | 2.794016  |   | H        | -5.443368 | -0.356517 |        |
| 0.144249 |           |           | 0.365814 |           |           |   | 0.530961 |           |           |        |
| H        | 4.744740  | 0.579161  | H        | -0.416479 | 2.543740  | - | C        | 1.332906  | 4.463683  |        |
| 0.210771 |           |           | 1.287649 |           |           |   | 1.704594 |           |           |        |
| C        | 5.914302  | -1.225667 | C        | -0.473188 | -3.659073 |   | H        | 2.041063  | 5.294851  |        |
| 0.138923 |           |           | 0.270077 |           |           |   | 1.811480 |           |           |        |
| H        | 6.860228  | -0.698266 | H        | -0.559522 | -4.718043 |   | H        | 1.623325  | 3.692413  |        |
| 0.219243 |           |           | 0.546280 |           |           |   | 2.427159 |           |           |        |
|          |           |           | H        | 0.463286  | -3.280728 |   | H        | 0.343488  | 4.836113  | 1.9975 |
|          |           |           | 0.695031 |           |           |   |          |           |           |        |
